# Supplementary material for: Prevalence of caregiver hesitancy for vaccinations in children and its associated factors: A systematic review and meta-analysis
Source: PubMed Central journal article supplement (PMC11500859; doi:10.1371/journal.pone.0302379), 2024-10-24
Supplement: pone.0302379.s001.pdf [file pone.0302379.s001.pdf]

**S1 Figure: PRISMA flow diagram on selection process**

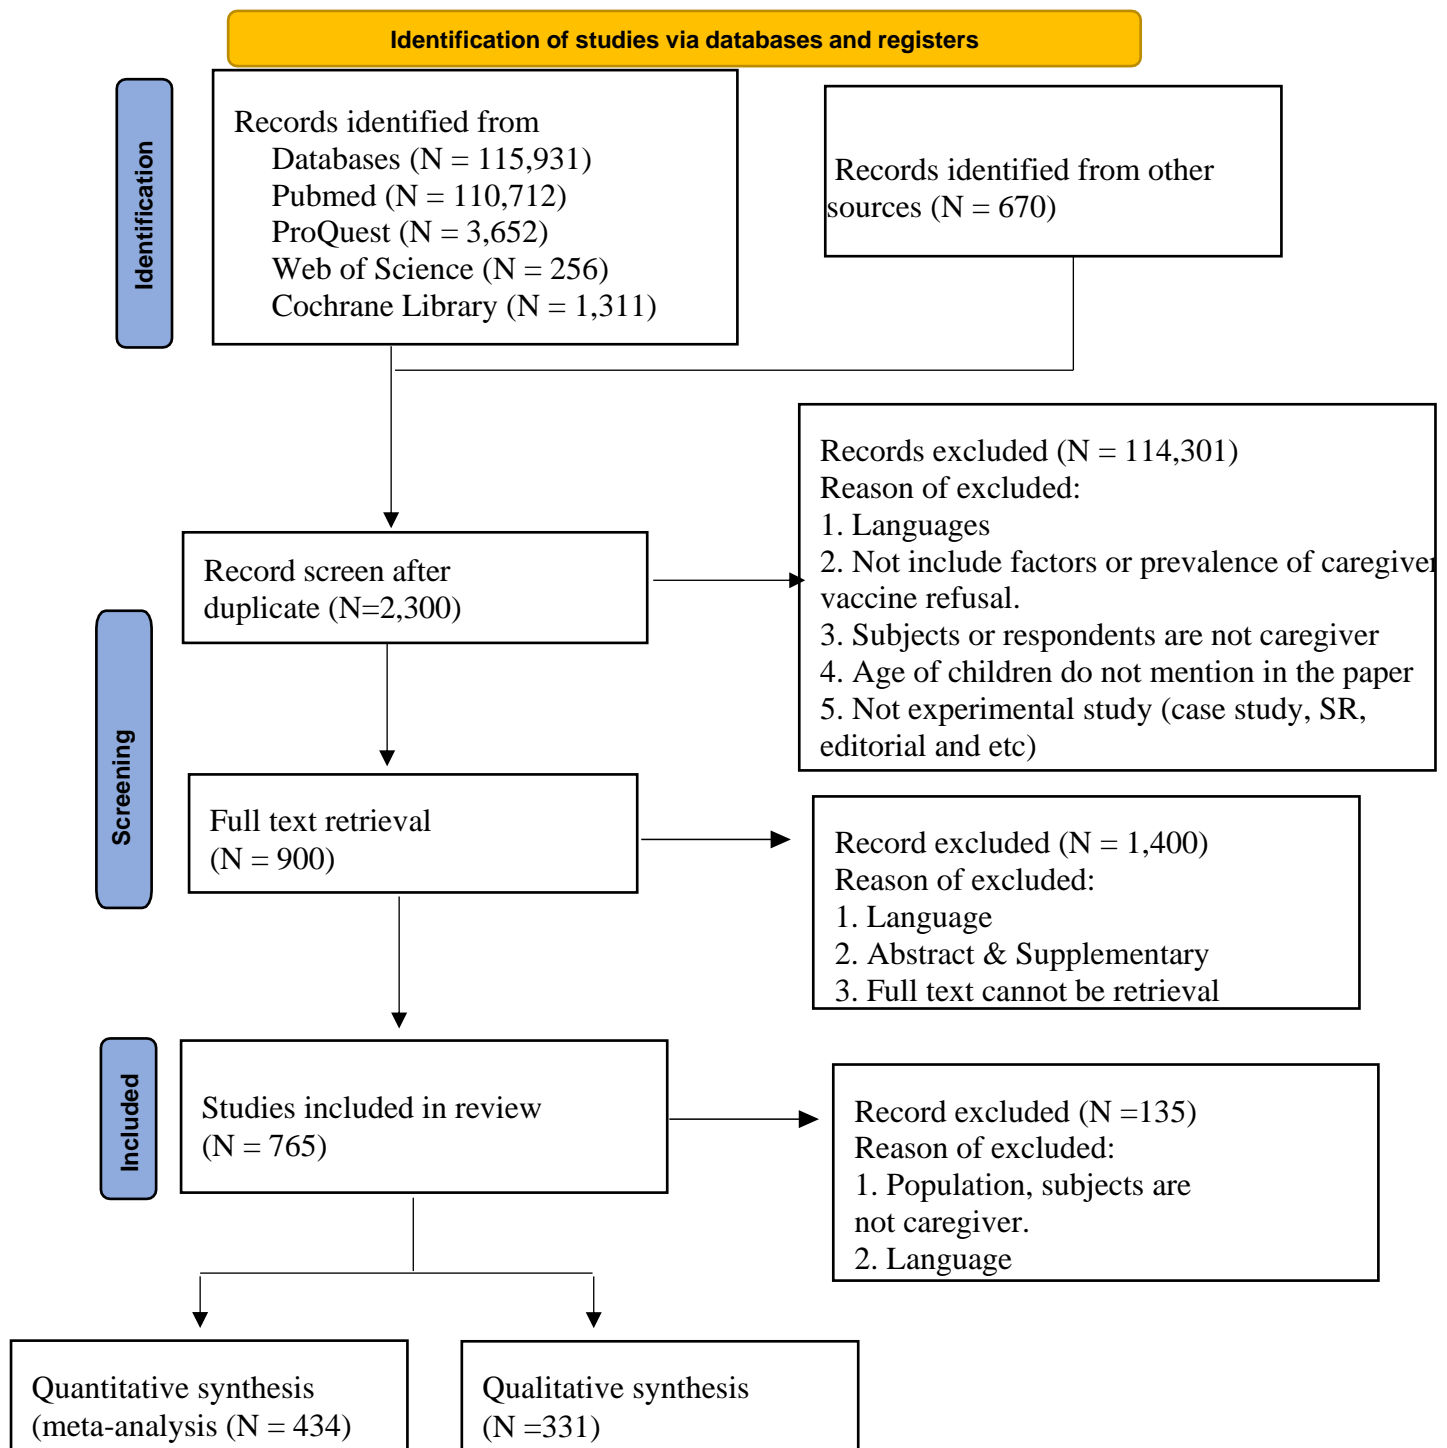

From: Page MJ, McKenzie JE, Bossuyt PM, Boutron I, Hoffmann TC, Mulrow CD, et al. The PRISMA 2020 statement: an updated guideline for reporting systematic reviews. *BMJ* 2021;372:n71. doi: 10.1136/bmj.n71. For more information, visit: <http://www.prisma-statement.org/>
