# Supplementary material for: Prevalence of caregiver hesitancy for vaccinations in children and its associated factors: A systematic review and meta-analysis
Source: PubMed Central journal article supplement (PMC11500859; doi:10.1371/journal.pone.0302379), 2024-10-24

**S2 Figure: Included papers reported on the reason of the parental vaccine hesitancy across the region in the review**

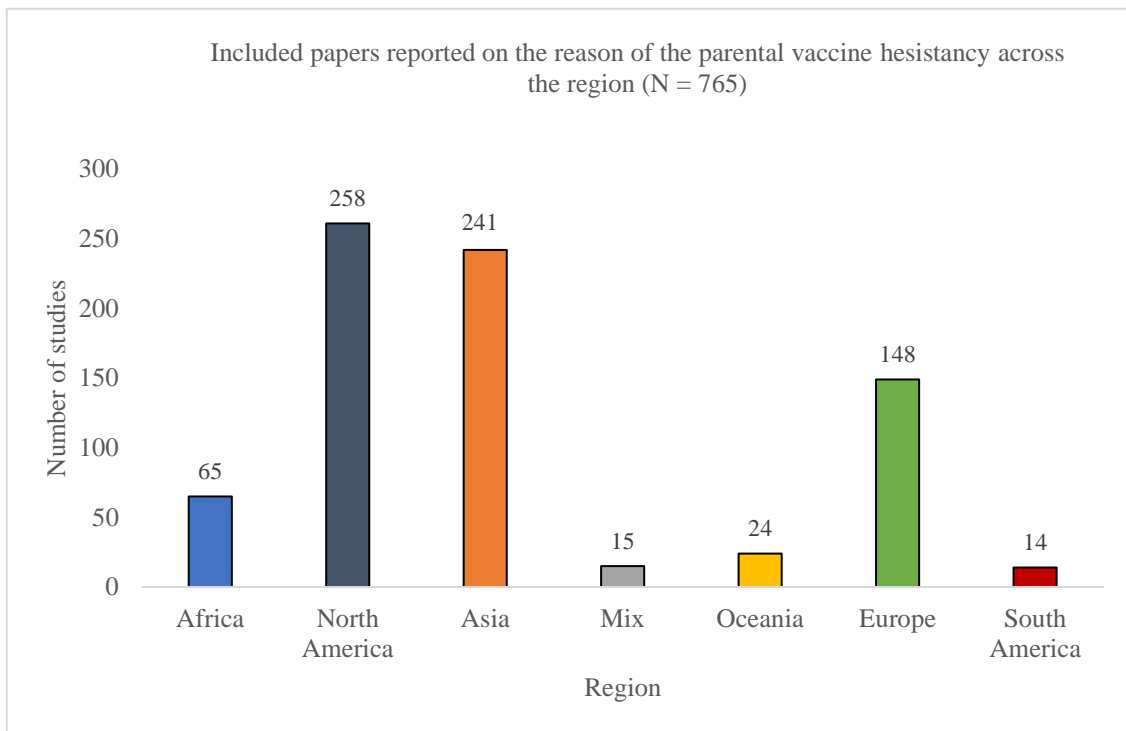

Supplement: pone.0302379.s002.pdf [file pone.0302379.s002.pdf]
