# Supplementary material for: Prevalence of caregiver hesitancy for vaccinations in children and its associated factors: A systematic review and meta-analysis
Source: PubMed Central journal article supplement (PMC11500859; doi:10.1371/journal.pone.0302379), 2024-10-24
Supplement: pone.0302379.s004.pdf [file pone.0302379.s004.pdf]

## S4 Figure: Forest plot overall prevalence of vaccine hesitancy

### (1) All vaccine

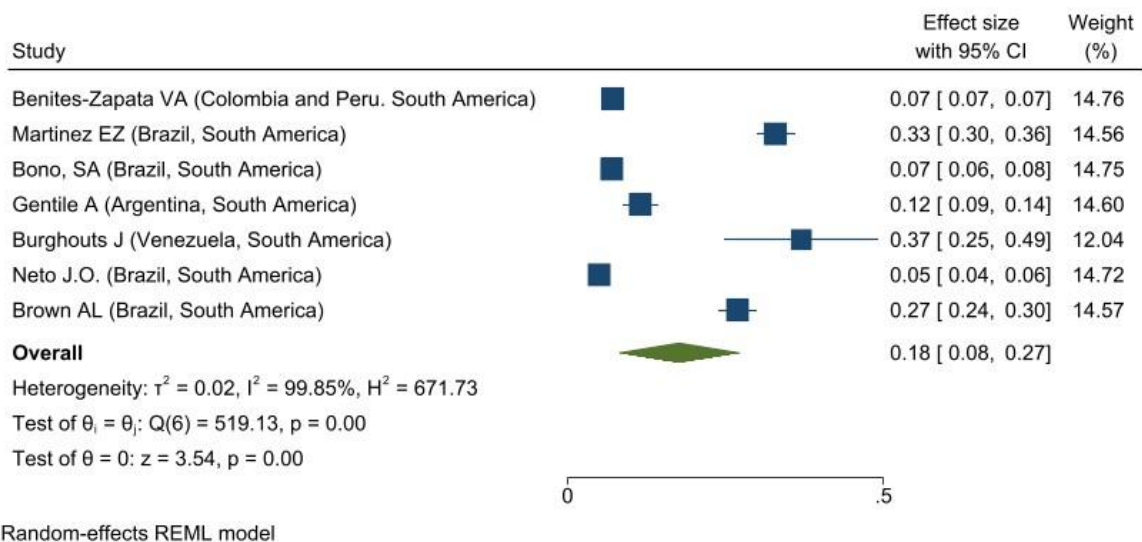

### i. *South America region*

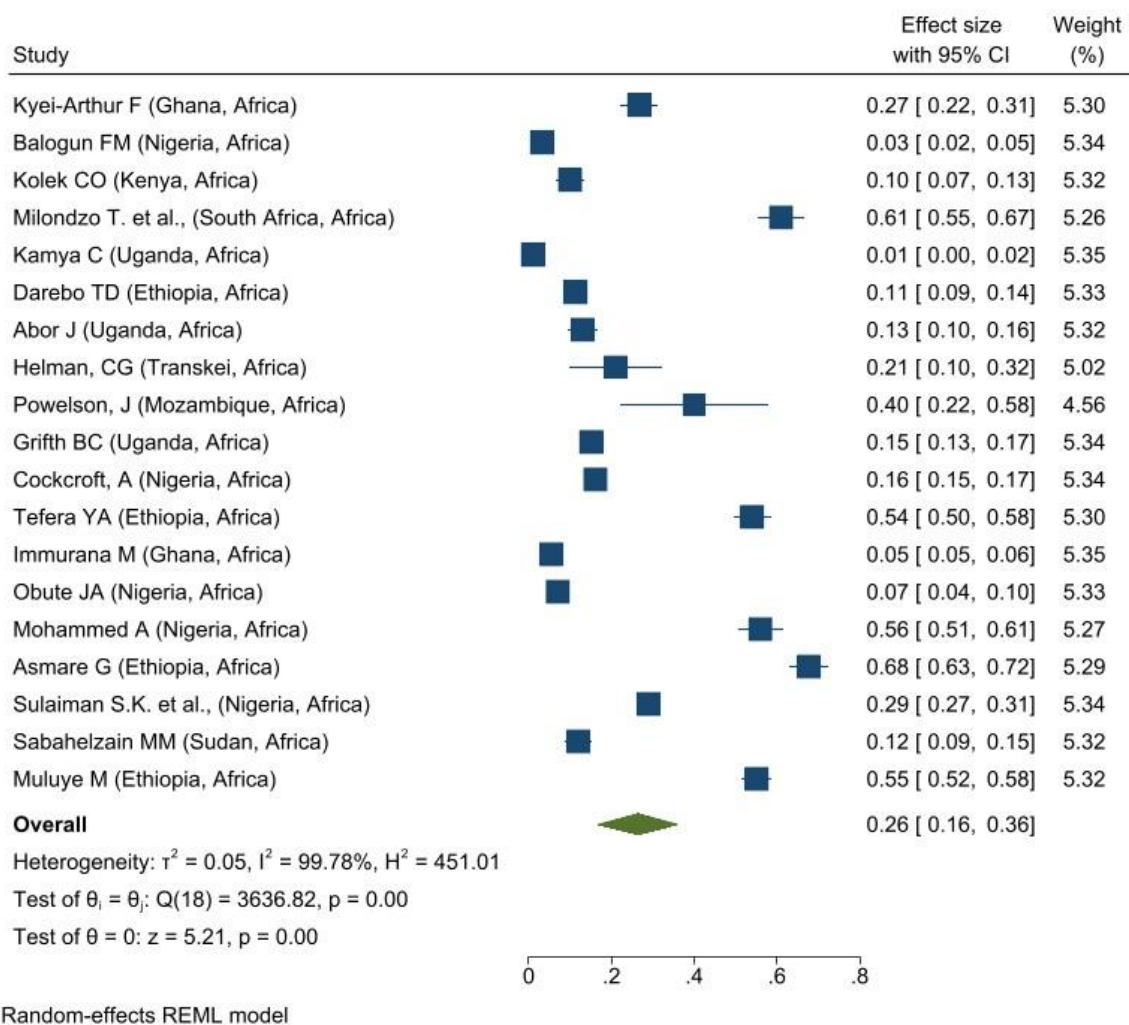

### ii. *Africa region*

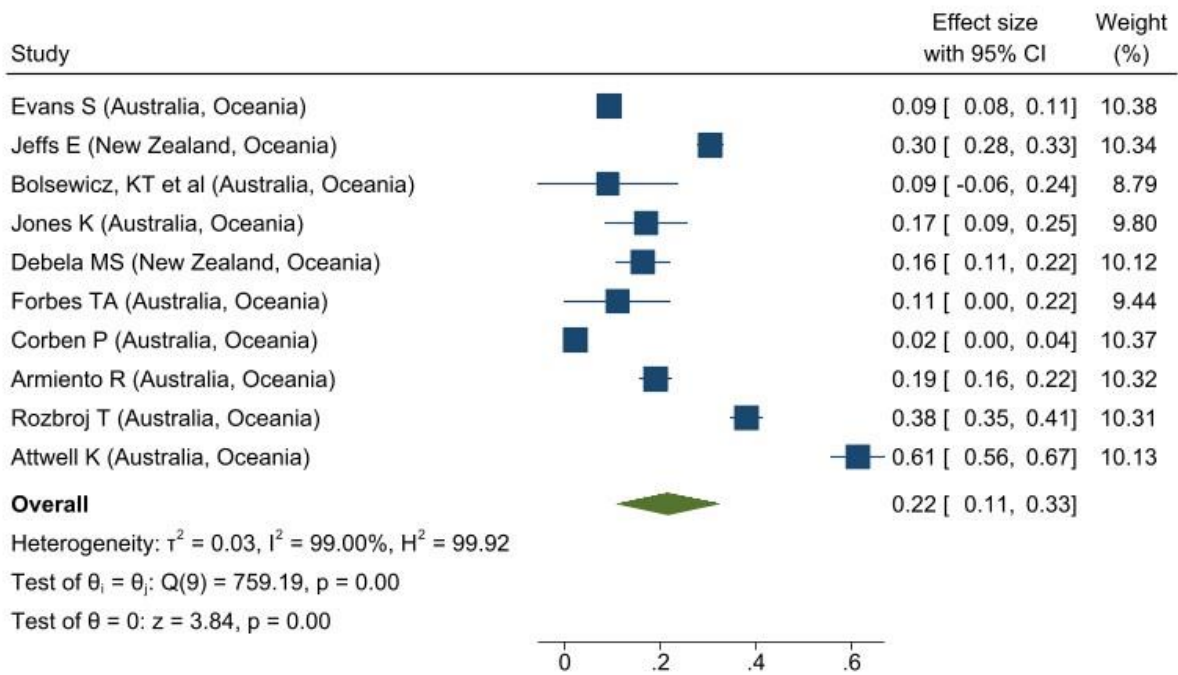

Random-effects REML model

iii. *Oceania region*

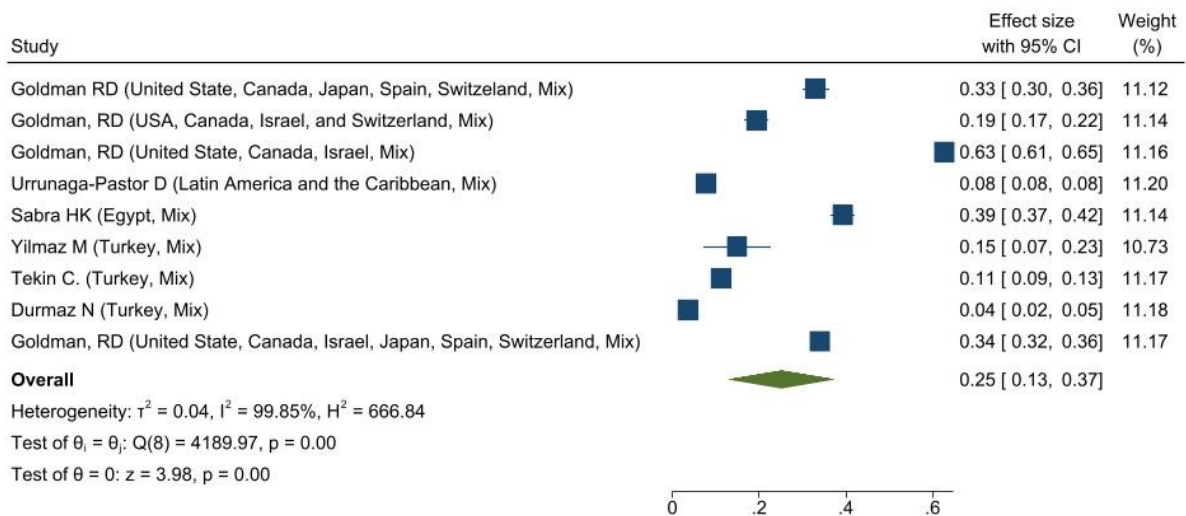

Random-effects REML model

v. *Mix region*

- Forest plot for all regions, Asia, North America and Europe are unable to be generated due to the total of articles (high number of articles) included for all type of vaccines.

## (2) Covid-19 vaccine

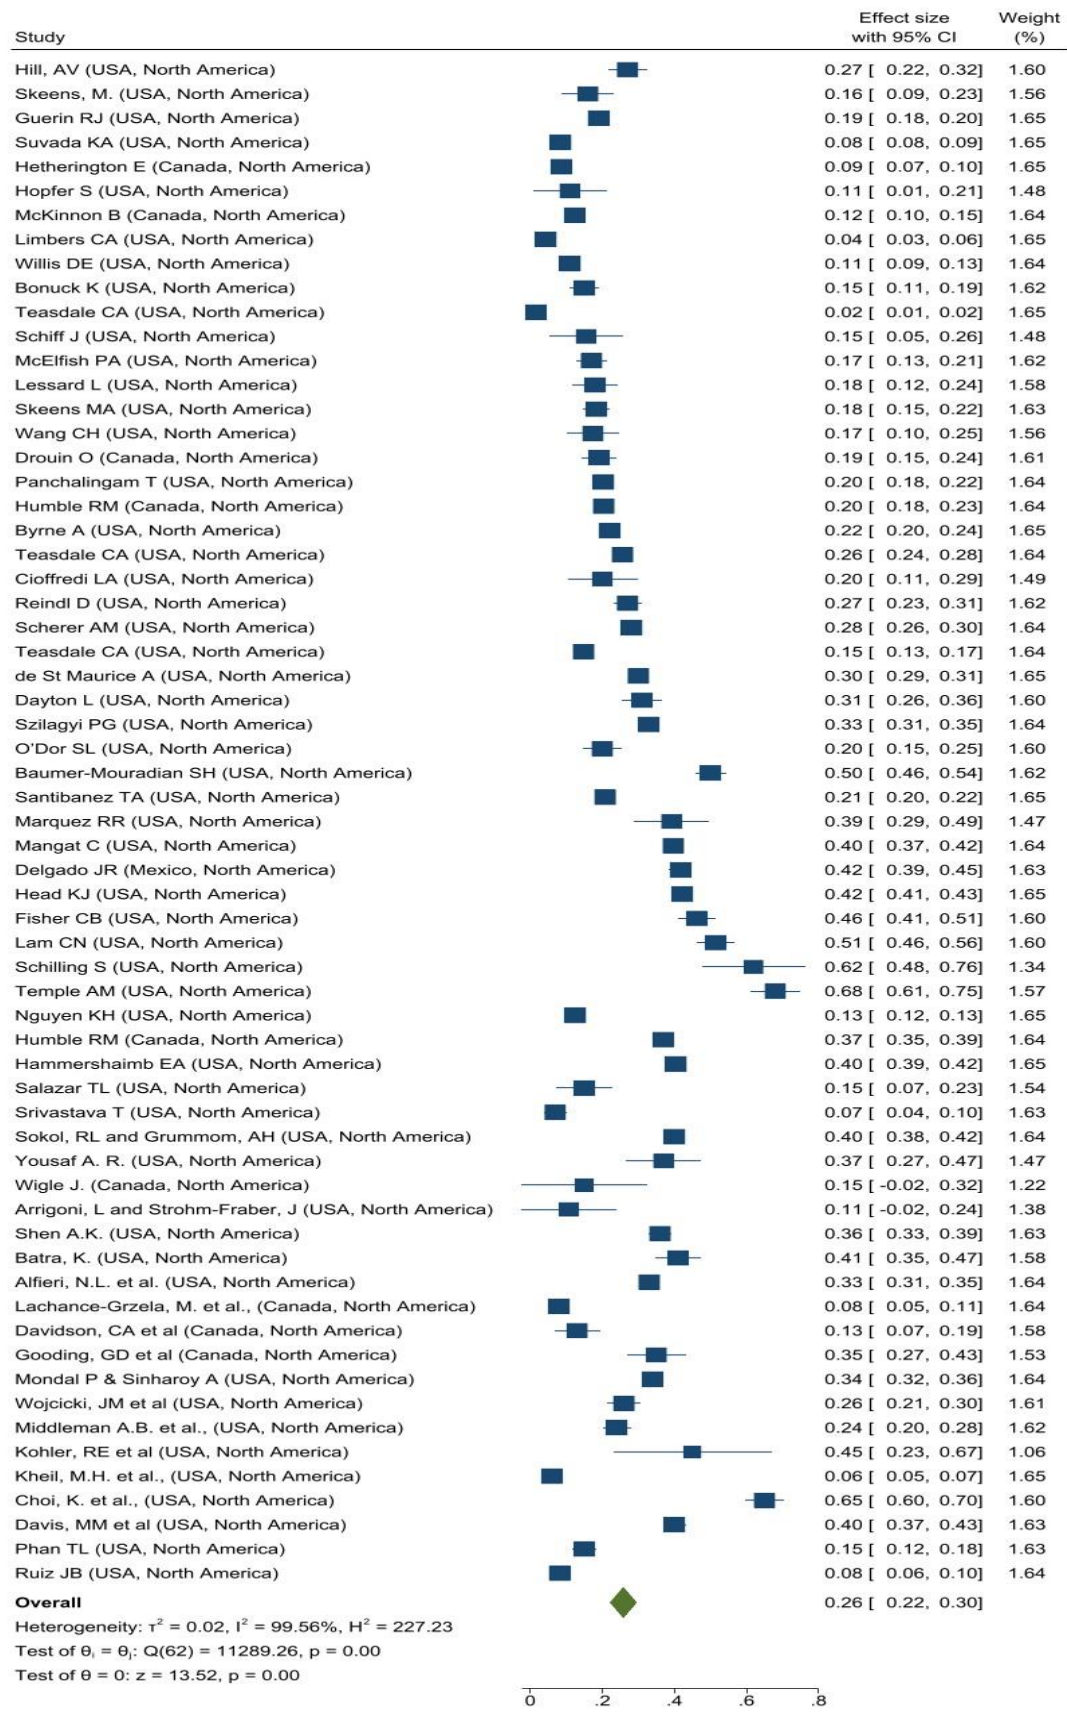

i. *North America region*

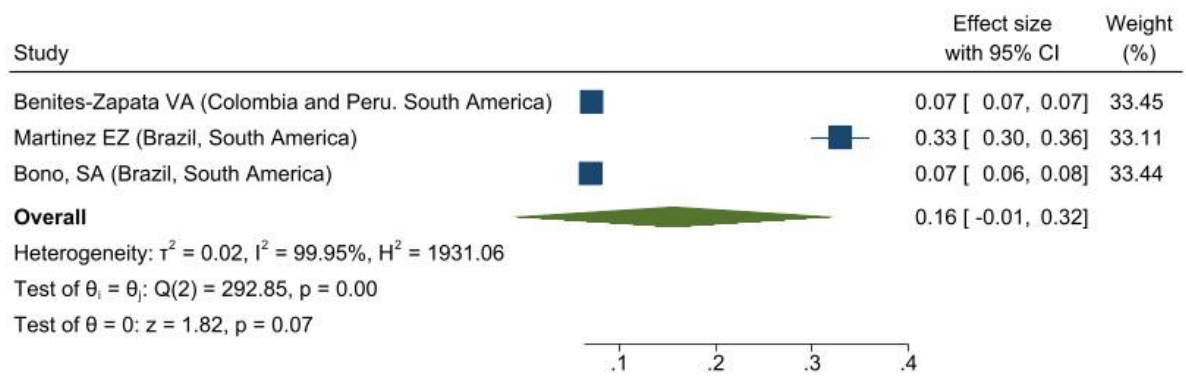

Random-effects REML model

*ii. South America region*

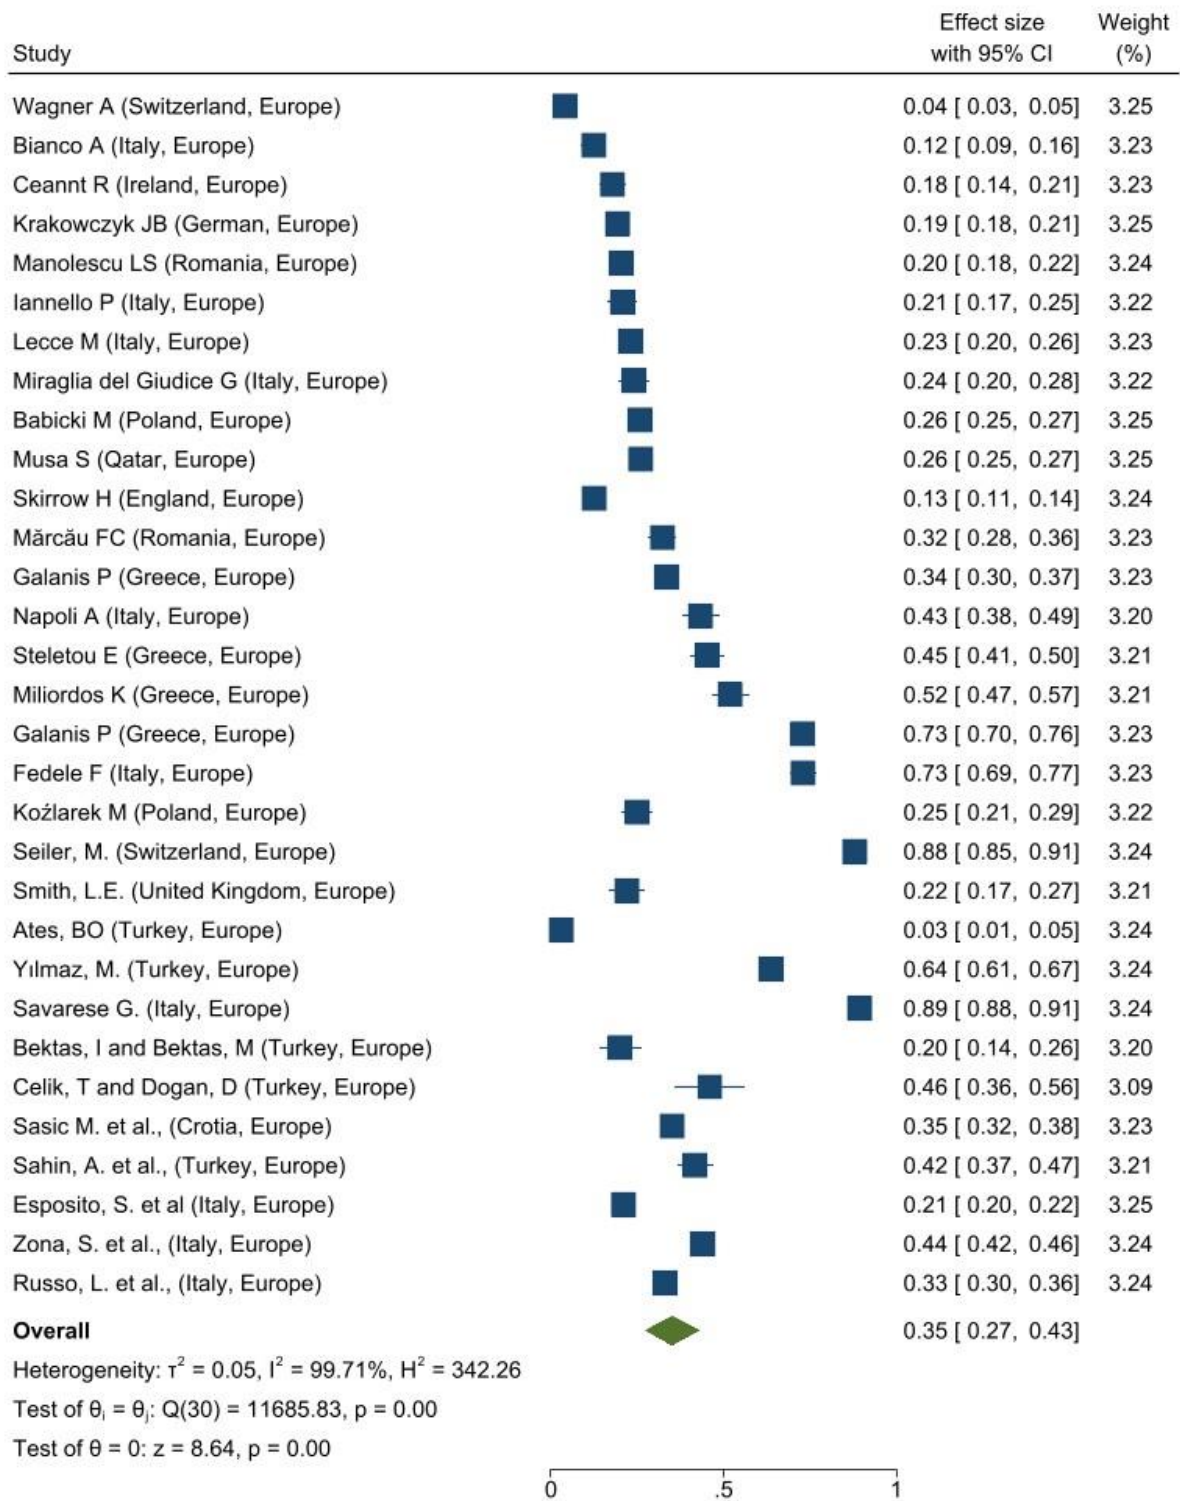

Random-effects REML model

*iii. Europe region*

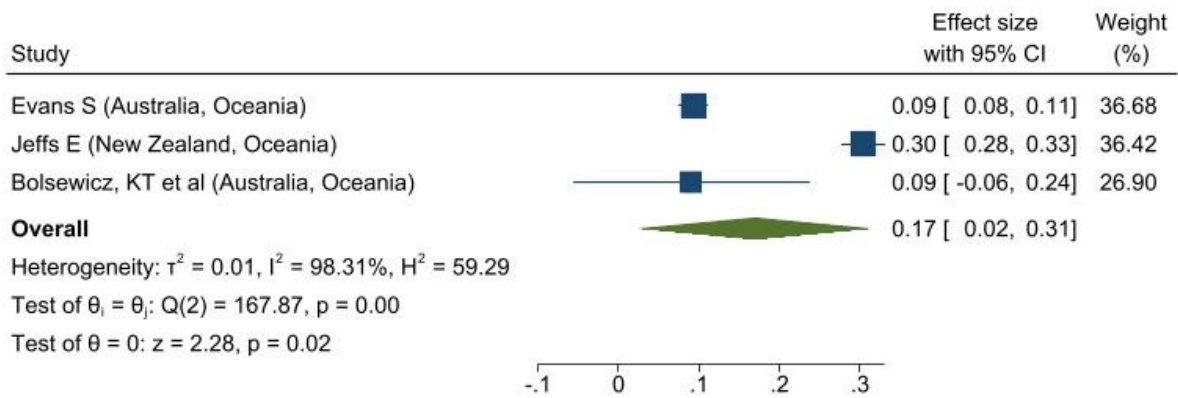

Random-effects REML model

iv. *Oceania region*

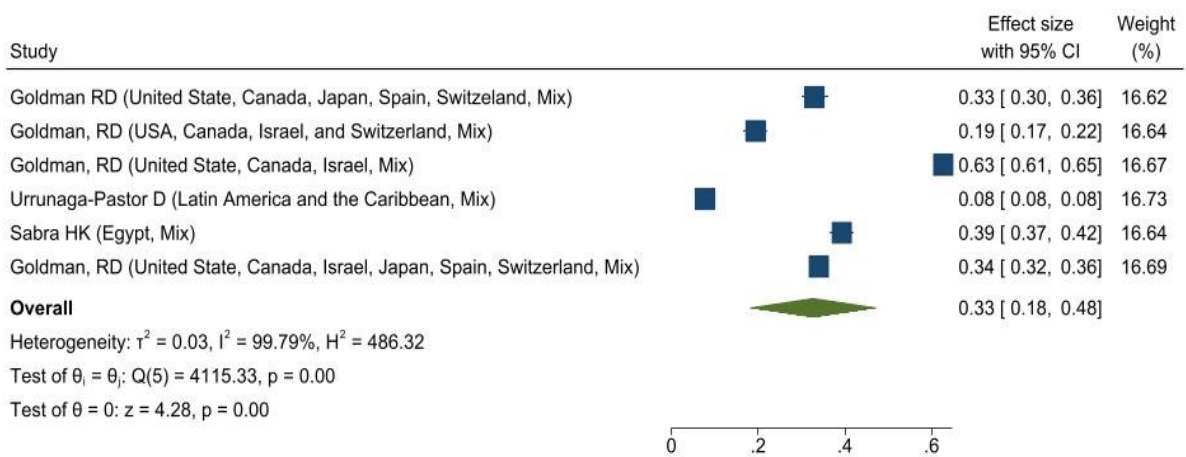

Random-effects REML model

v. *Mix region*

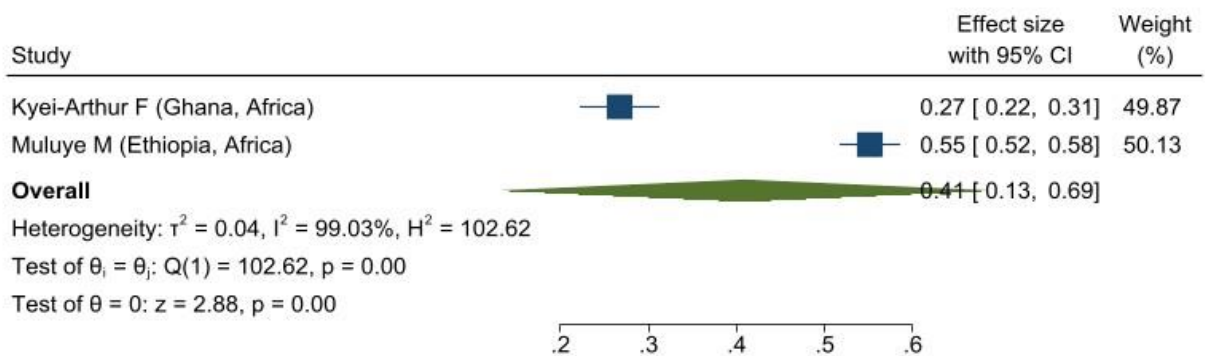

Random-effects REML model

vi. *Africa region*

- Forest plot for all regions and Asia are unable to be generated due to the total of articles (high number of articles) included for COVID-19 vaccine.

### (3) HPV vaccine

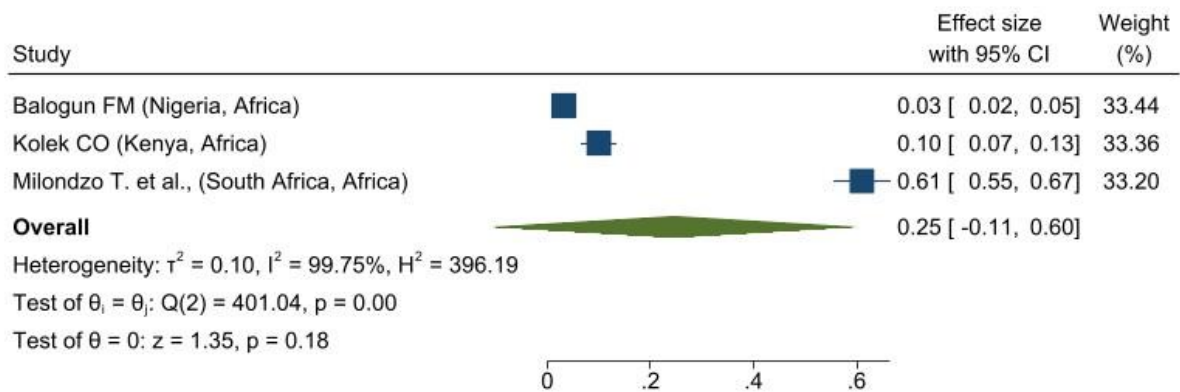

Random-effects REML model

#### *i. Africa region*

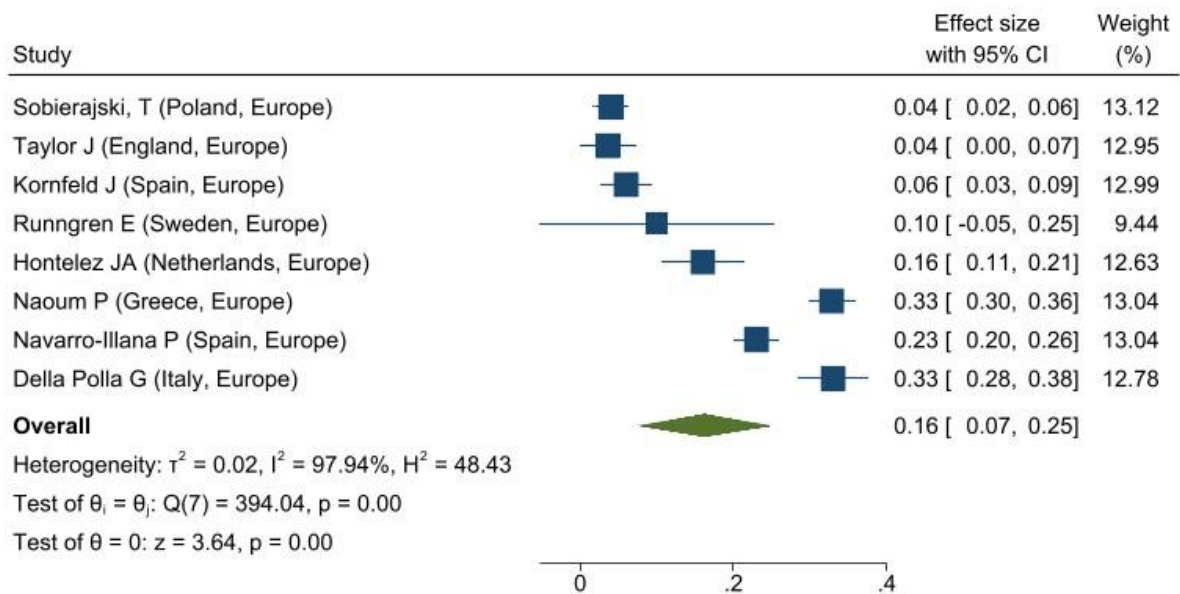

Random-effects REML model

#### *ii. Europe region*

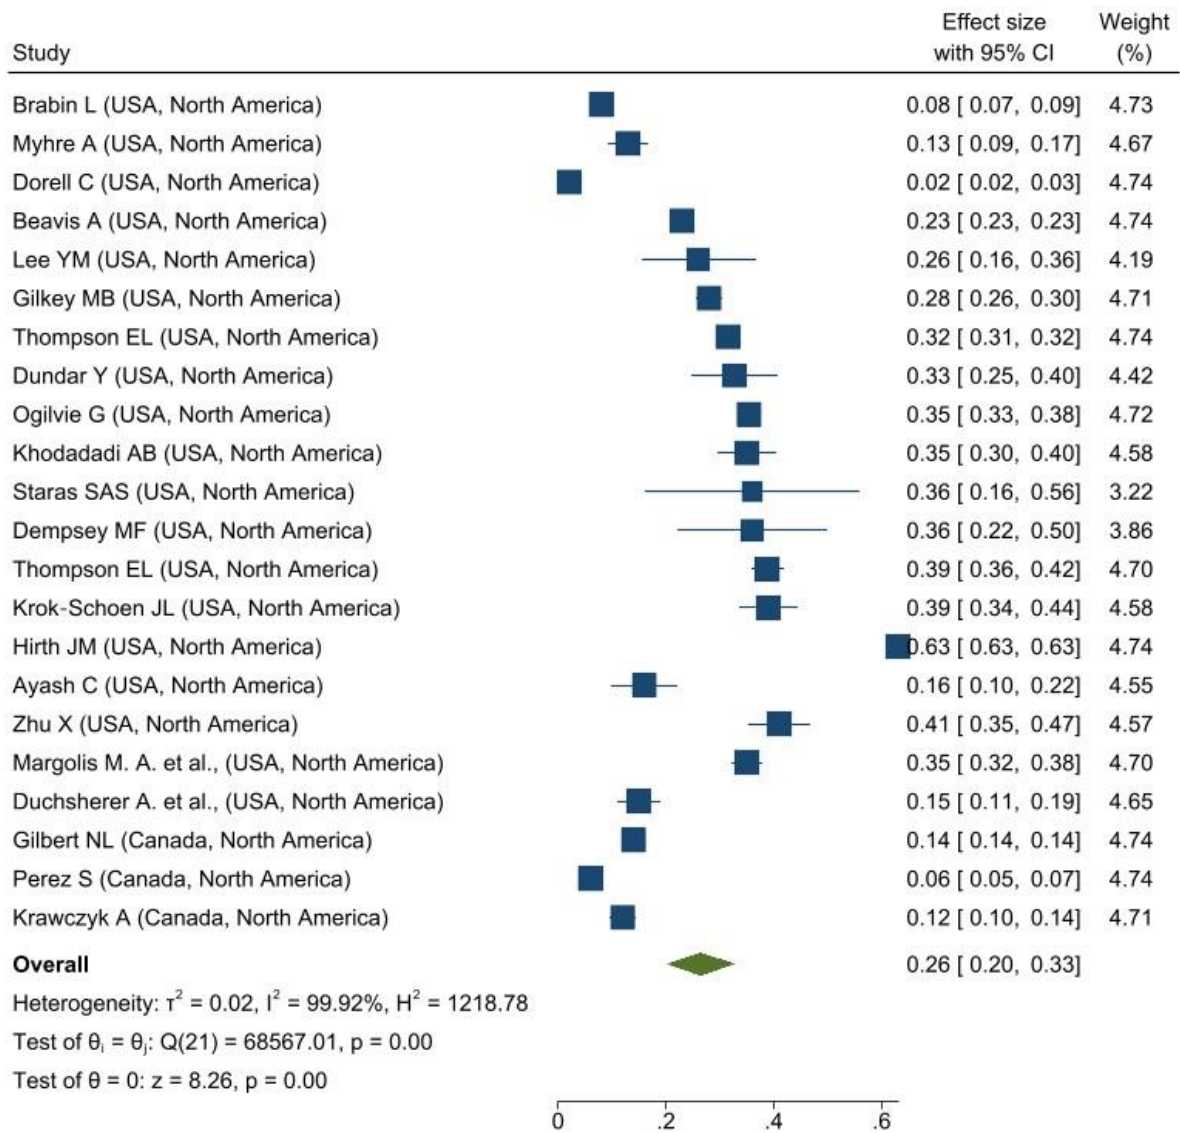

Random-effects REML model

*iii. North America region*



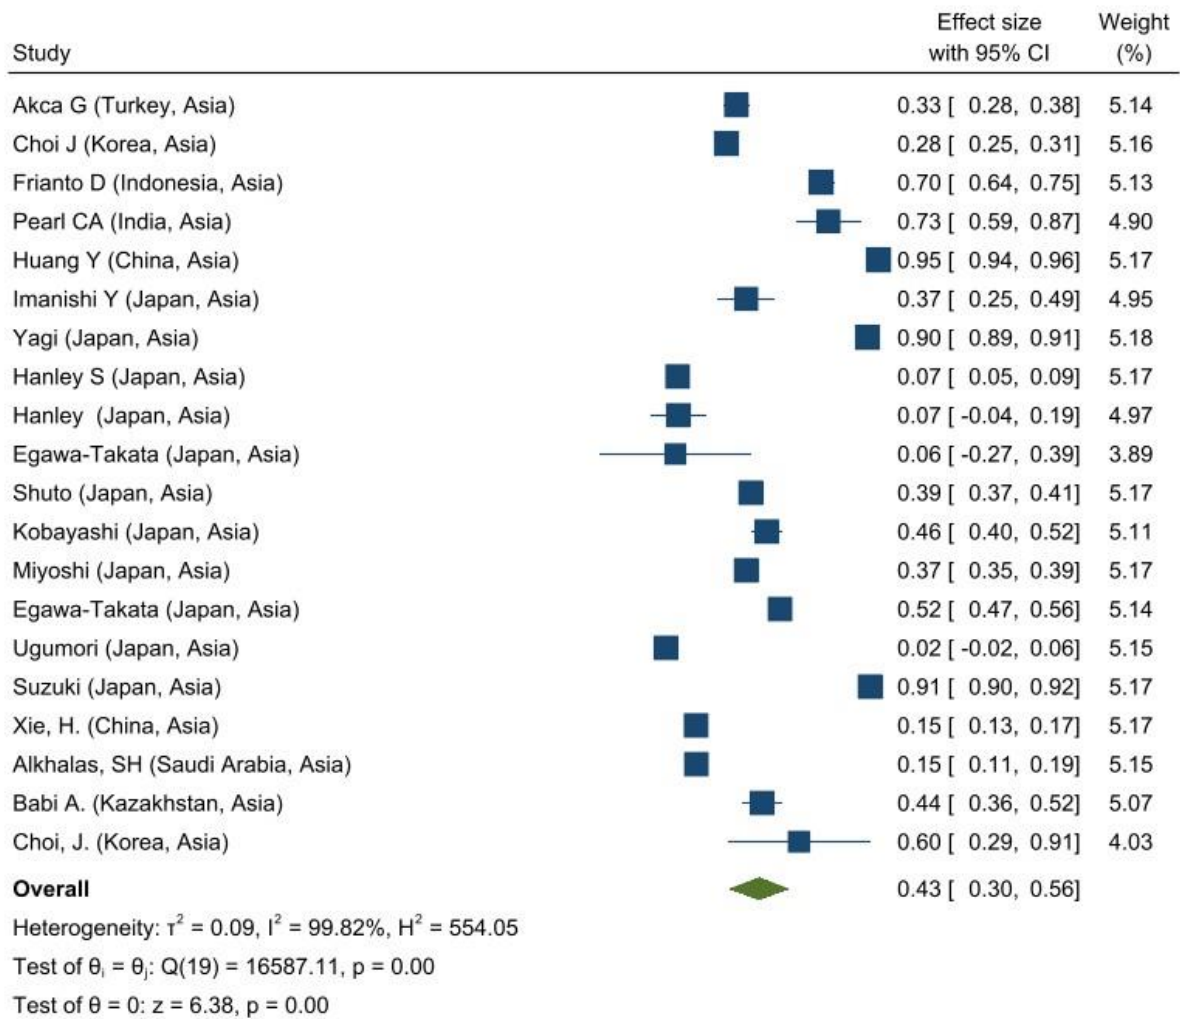

Random-effects REML model

*iv. Asia region*

#### 4) Influenza vaccine

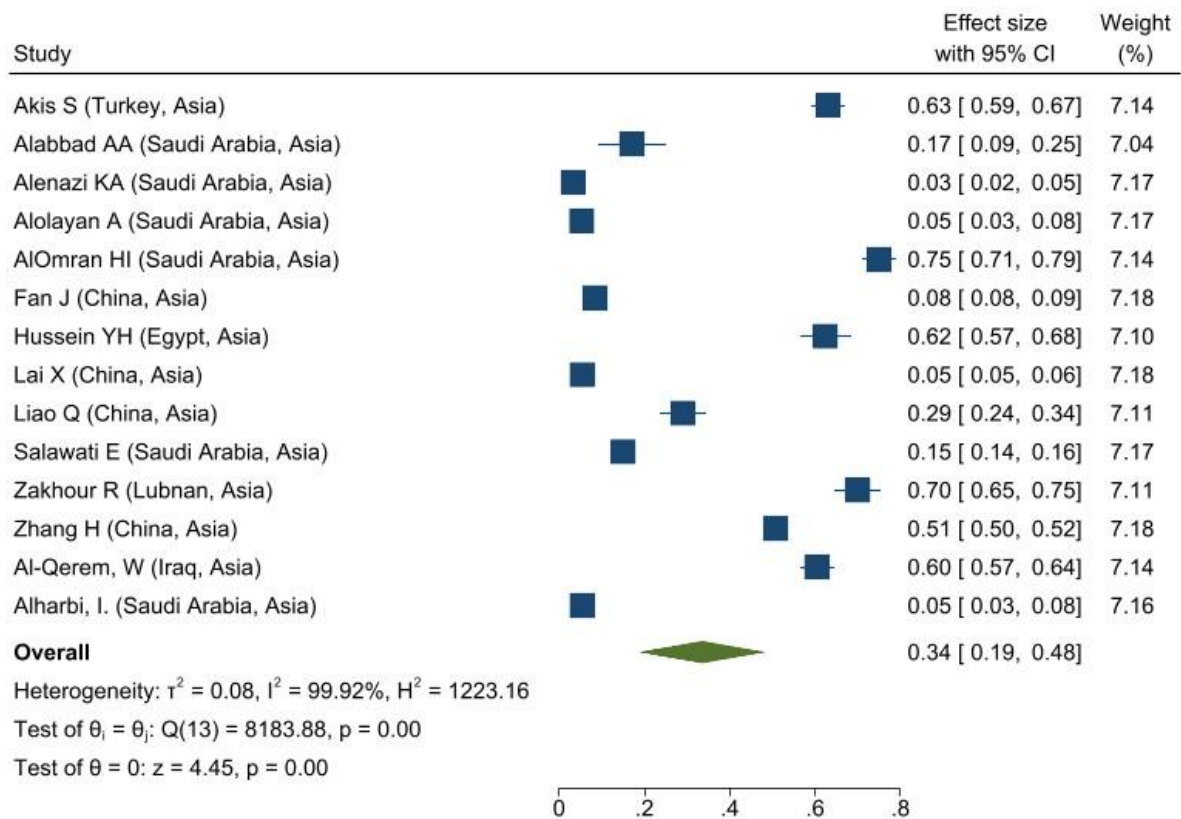

Random-effects REML model

##### i. Asia region

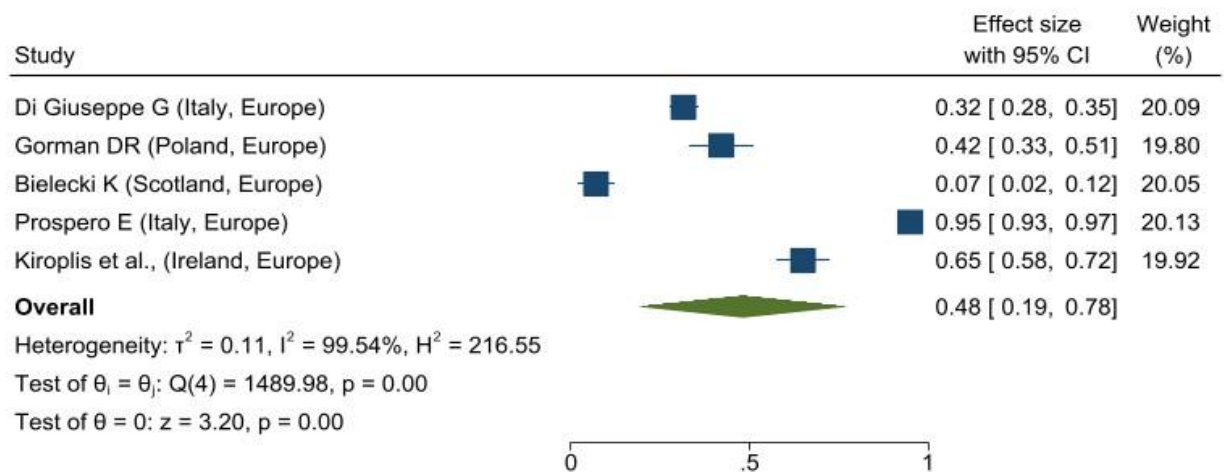

Random-effects REML model

##### ii. Europe region

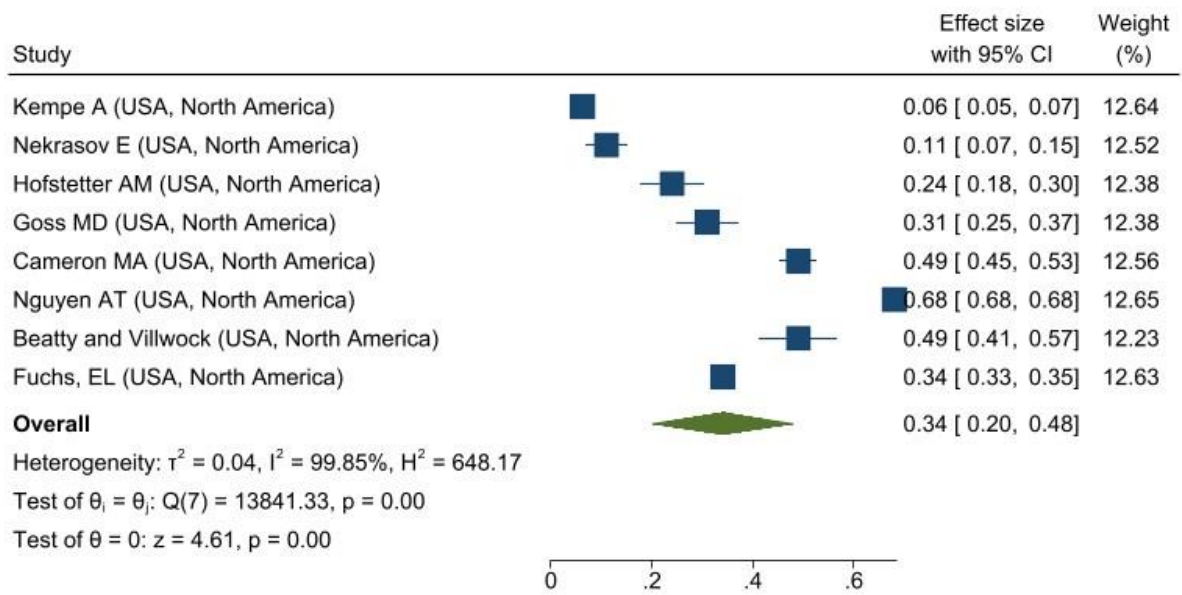

Random-effects REML model

*iii. North America*

## 5) Mix vaccine

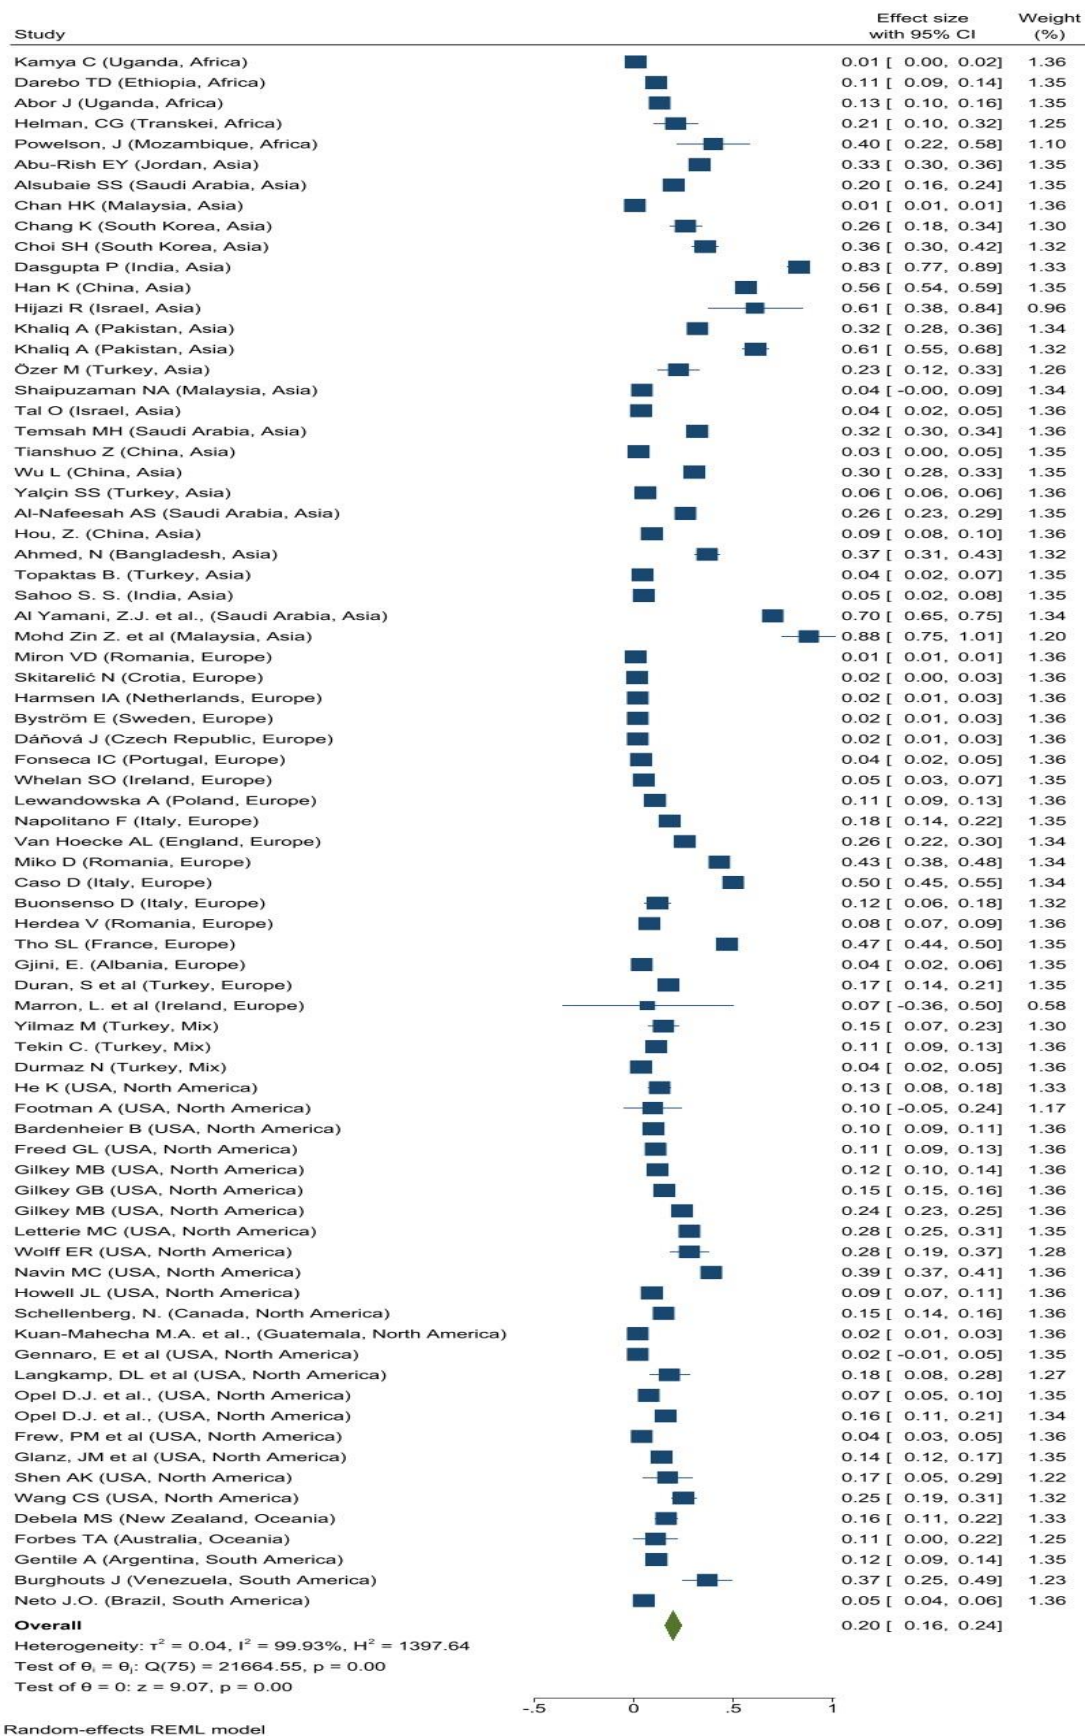

i. All region

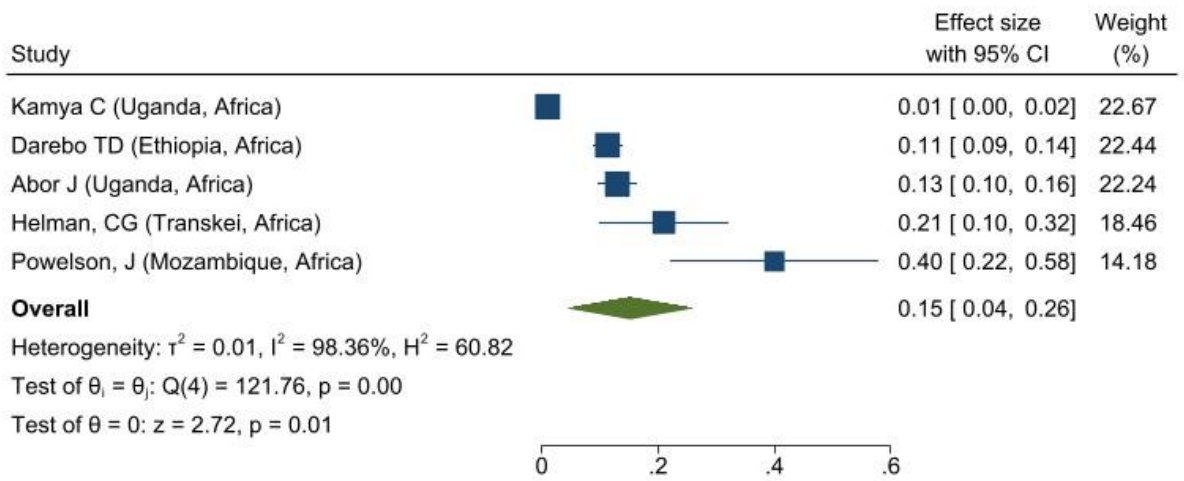

Random-effects REML model

*ii. Africa region*

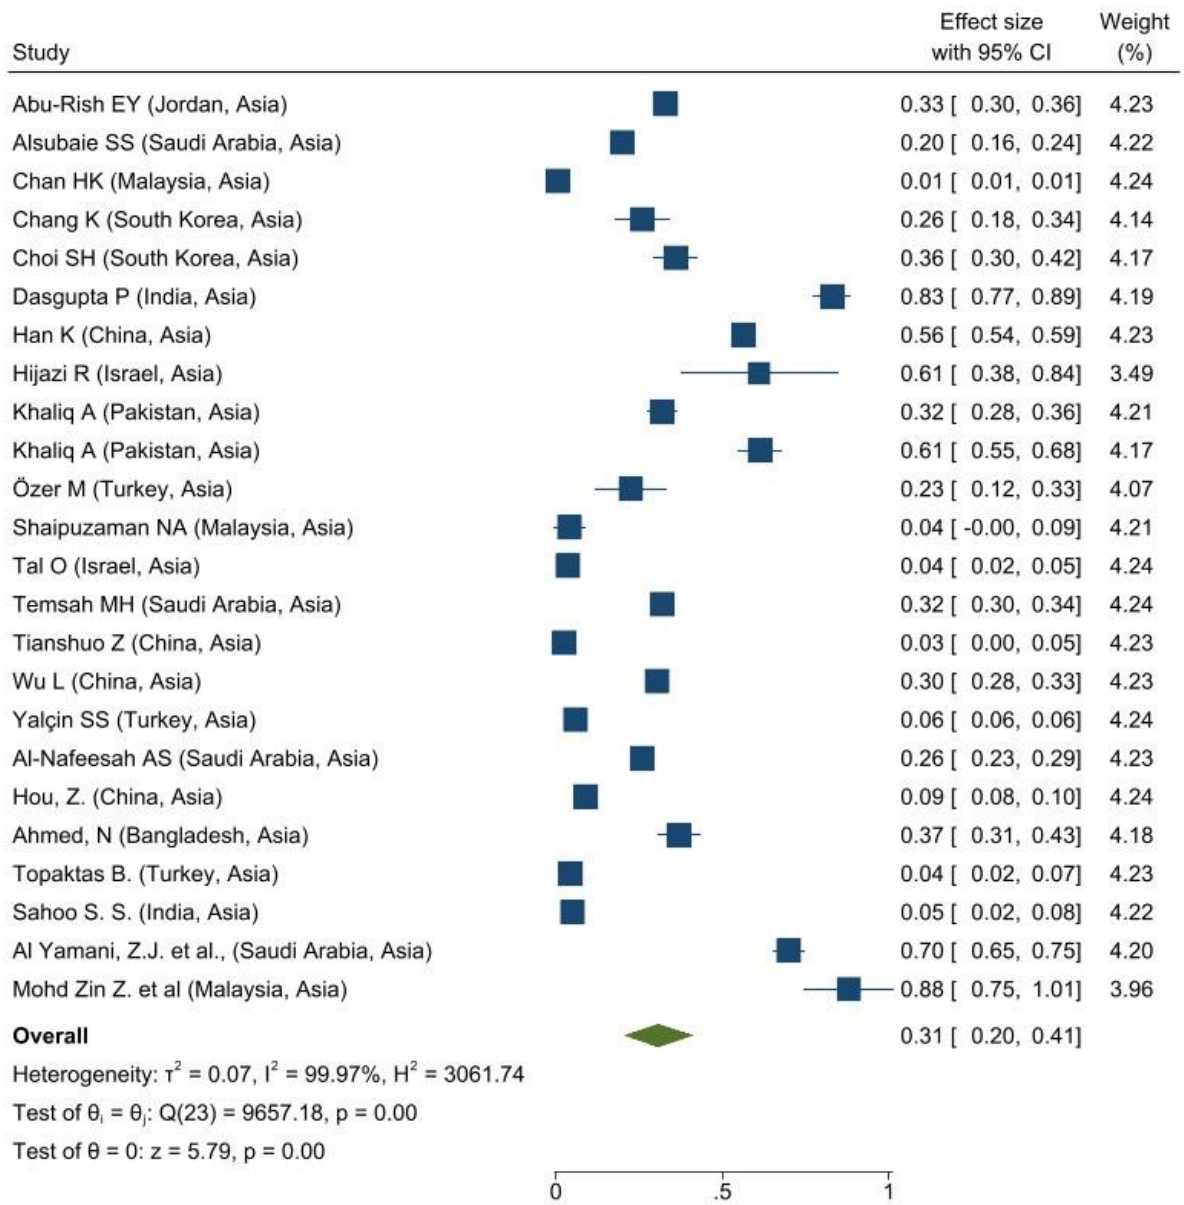

Random-effects REML model

iii. Asia region

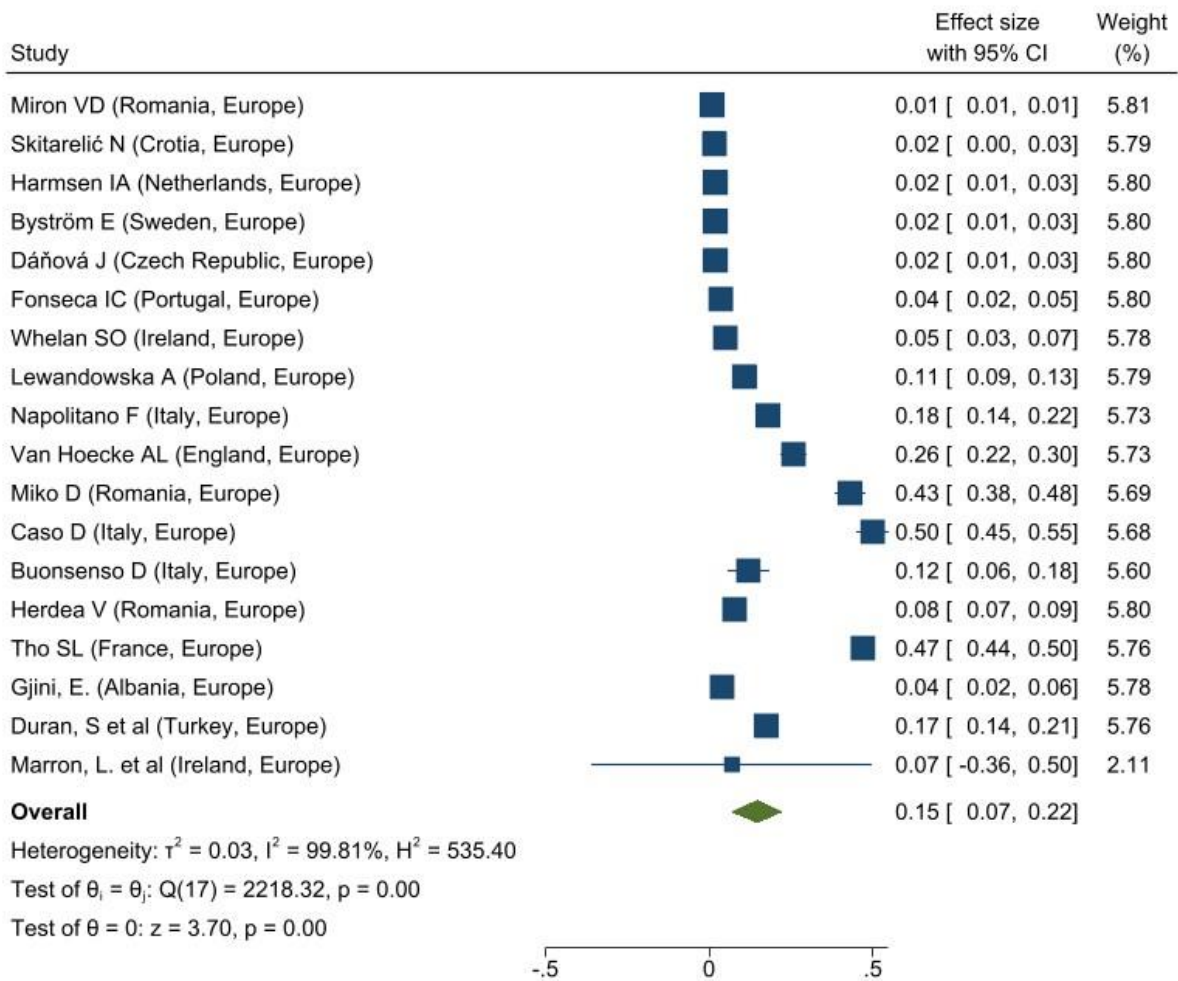

Random-effects REML model

iv. *Europe region*

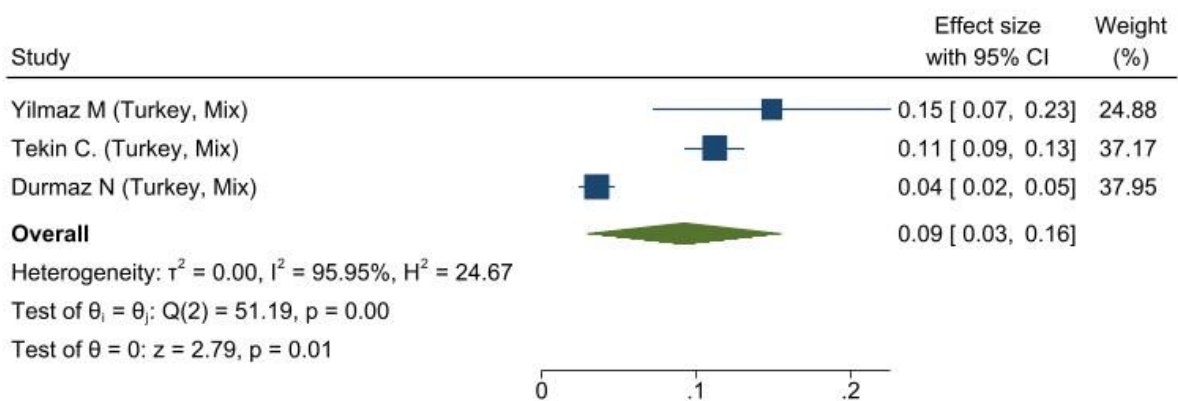

Random-effects REML model

v. *Mix region*

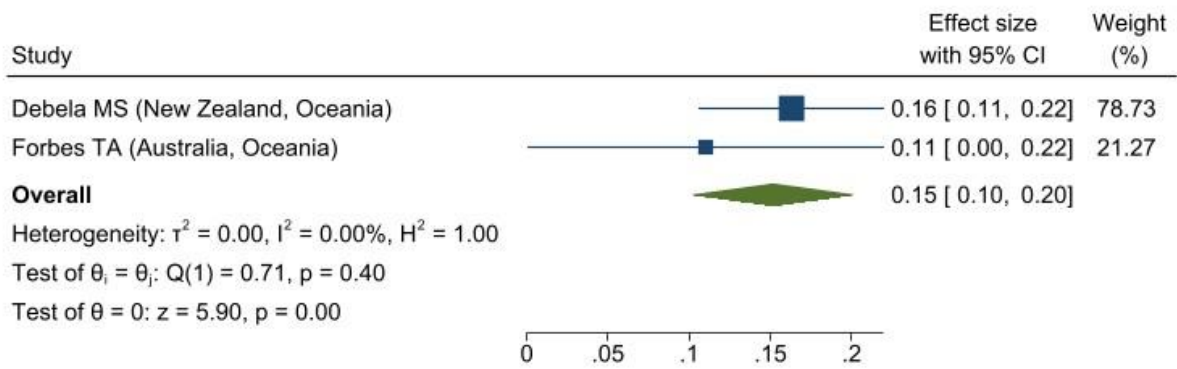

Random-effects REML model

vi. *Oceania region*

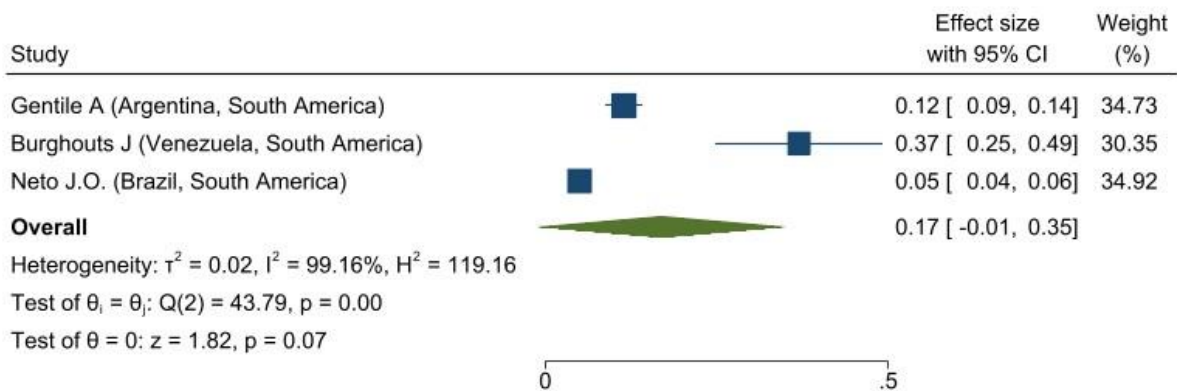

Random-effects REML model

vii. *South America region*



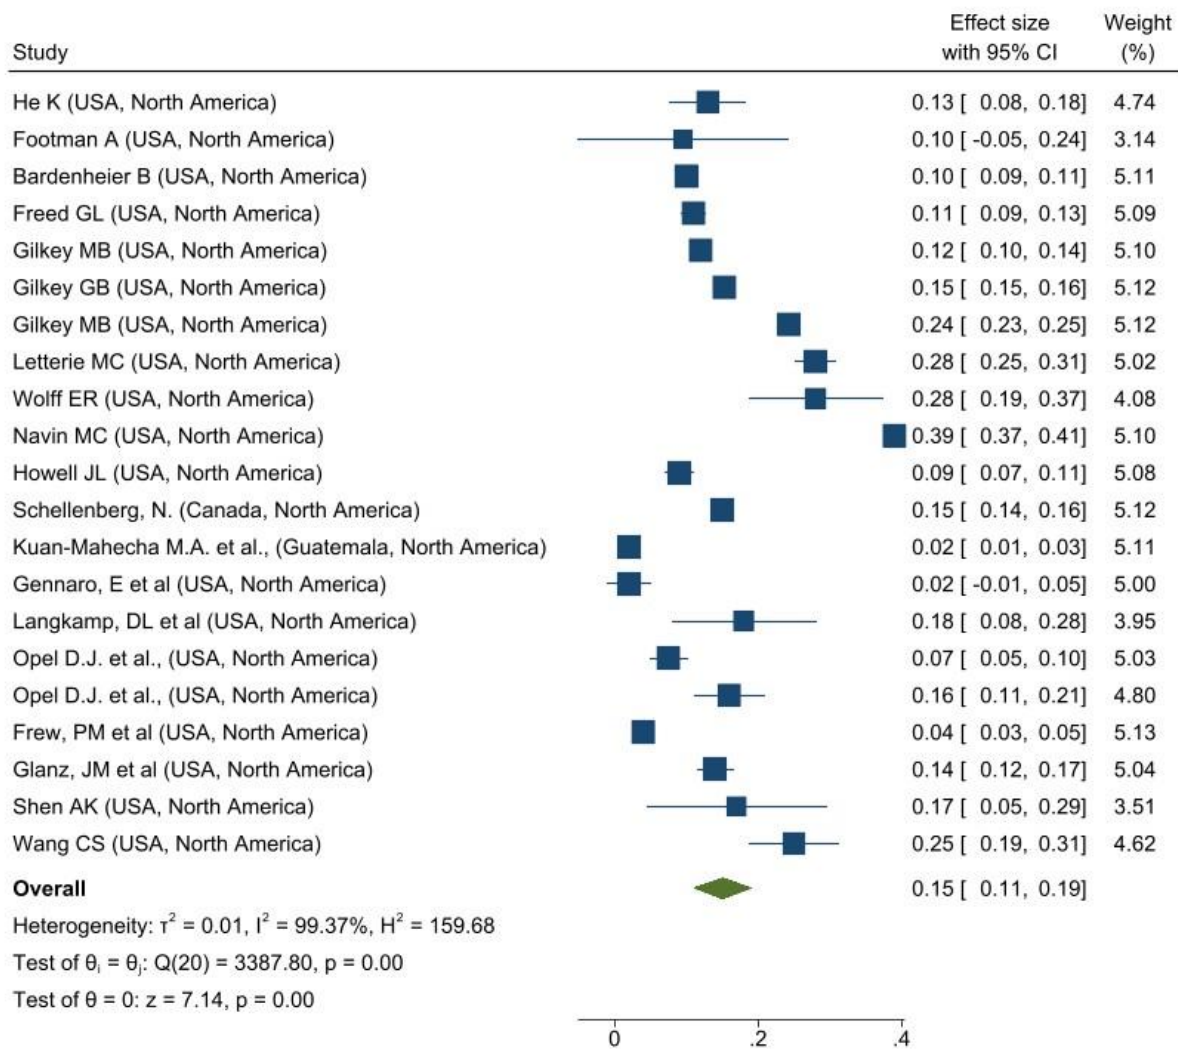

Random-effects REML model

viii. *North America region*

## 6) MMR vaccine

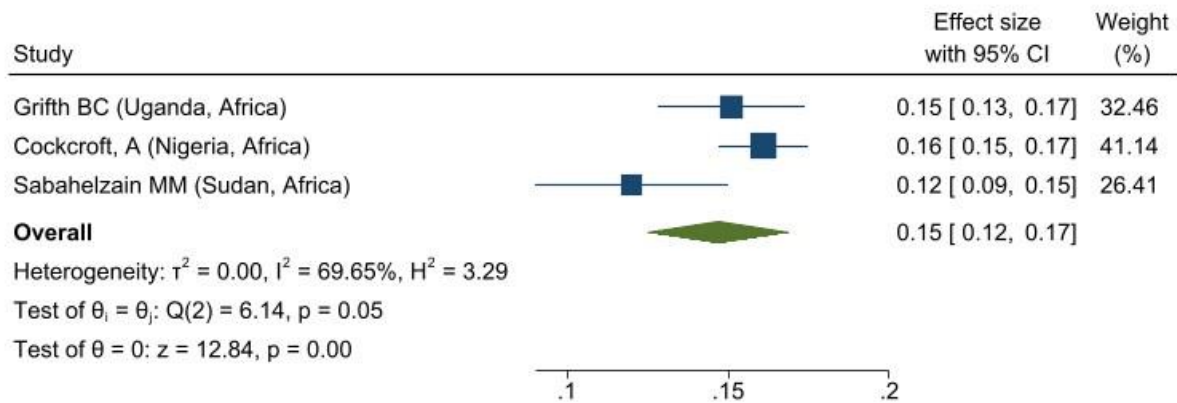

Random-effects REML model

### i. Africa region

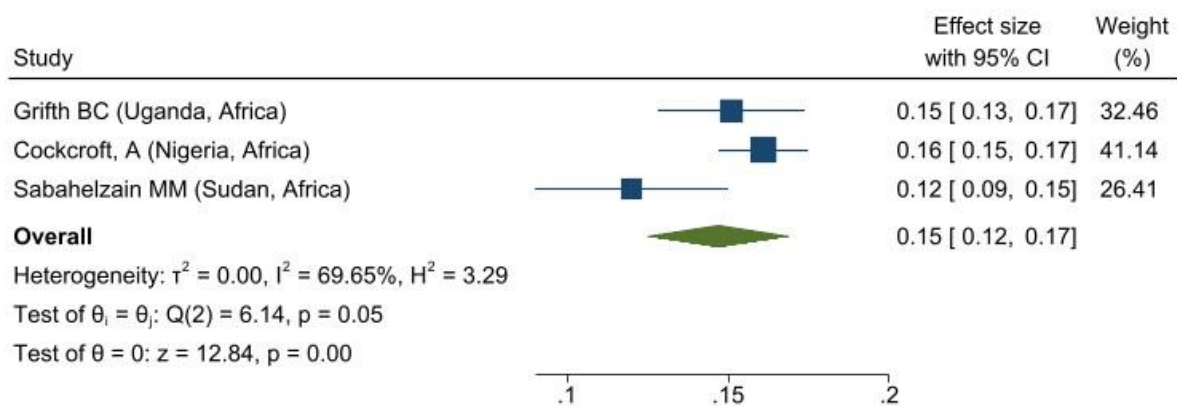

Random-effects REML model

### ii. Asia region

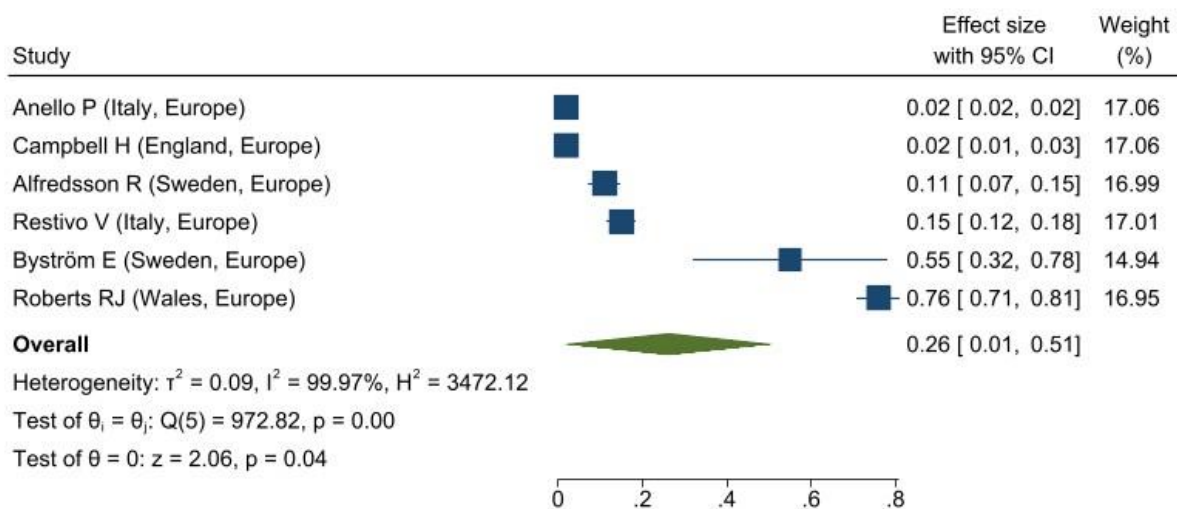

Random-effects REML model

iii. *Europe region*

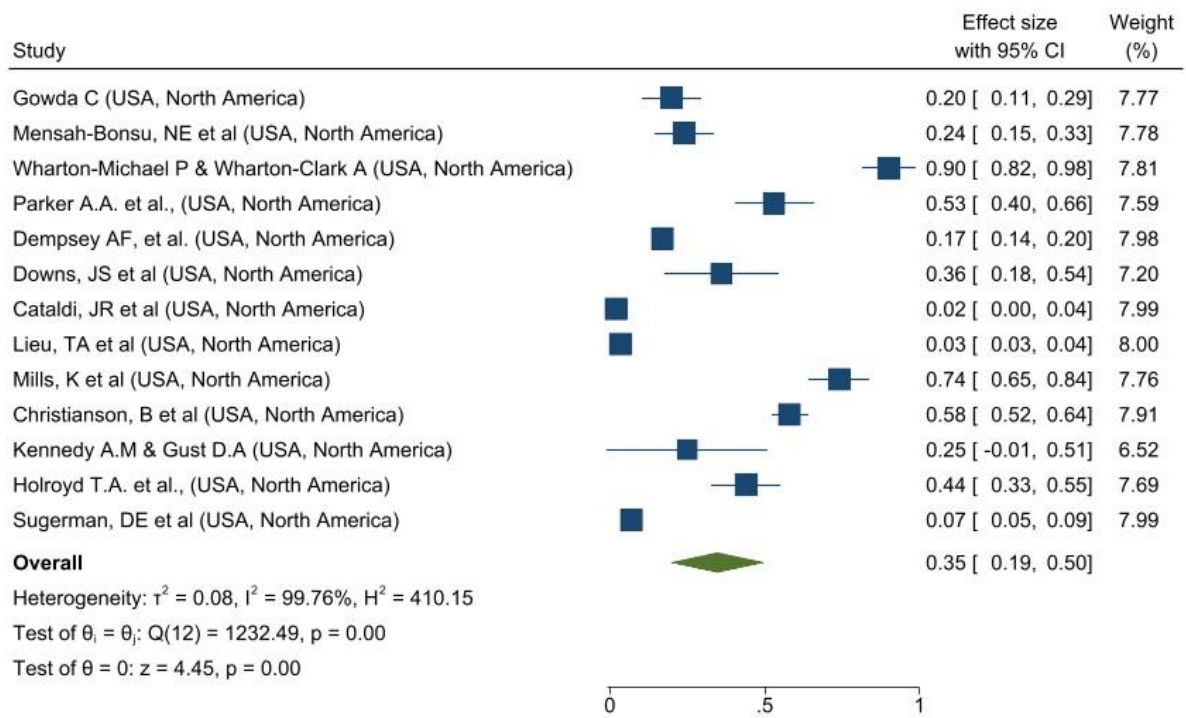

Random-effects REML model

iv. *North America region*

## 7) Others vaccine

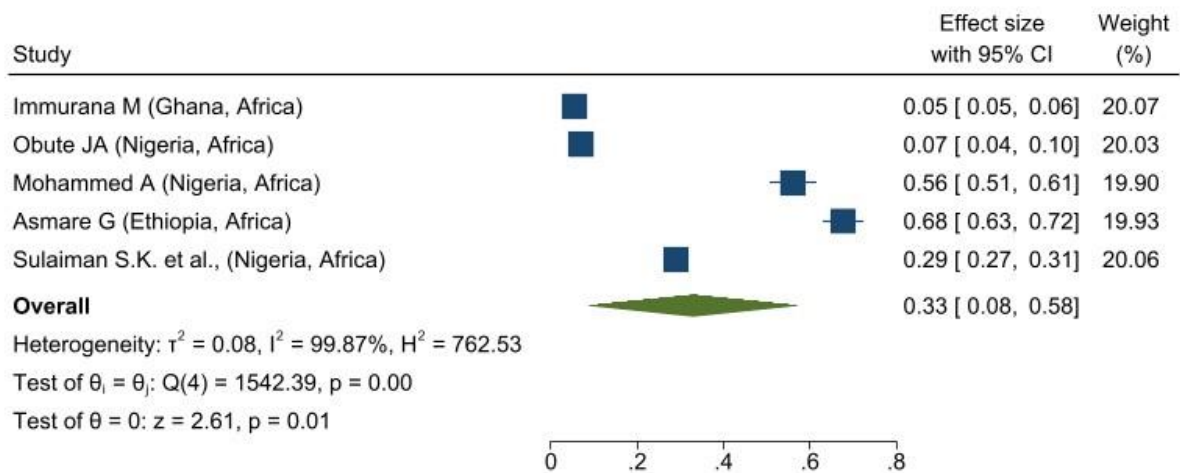

Random-effects REML model

### i. Africa region

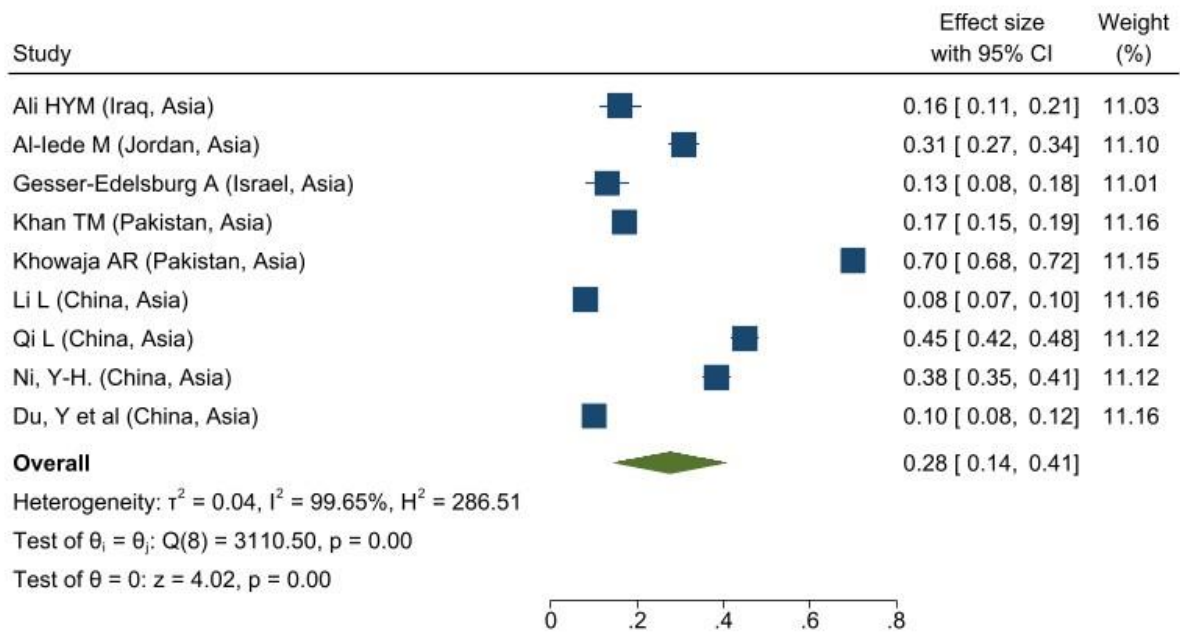

Random-effects REML model

### i. Asia region

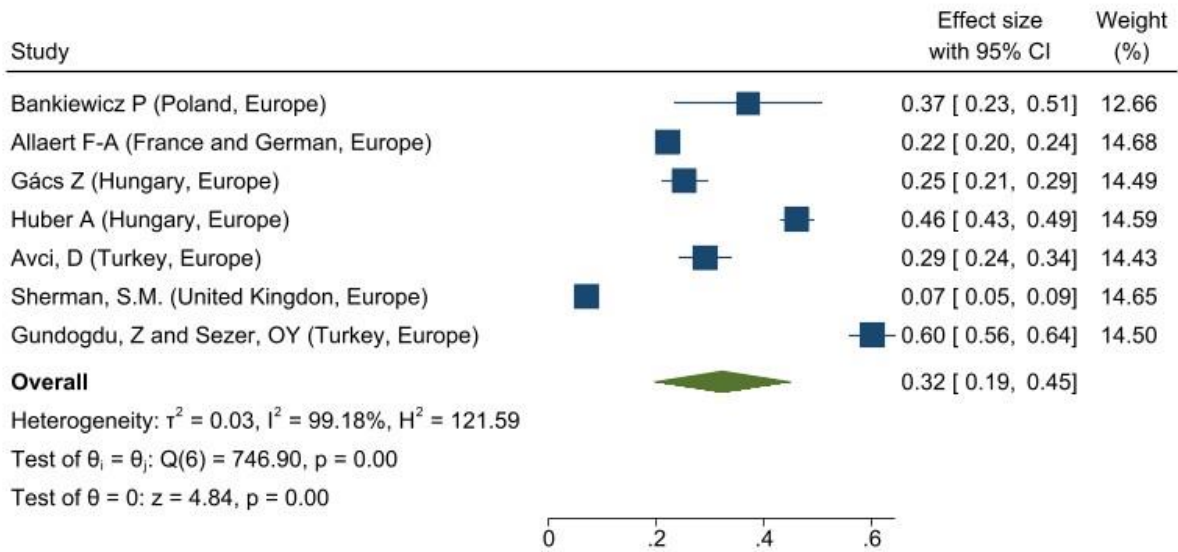

Random-effects REML model

ii. *Europe region*

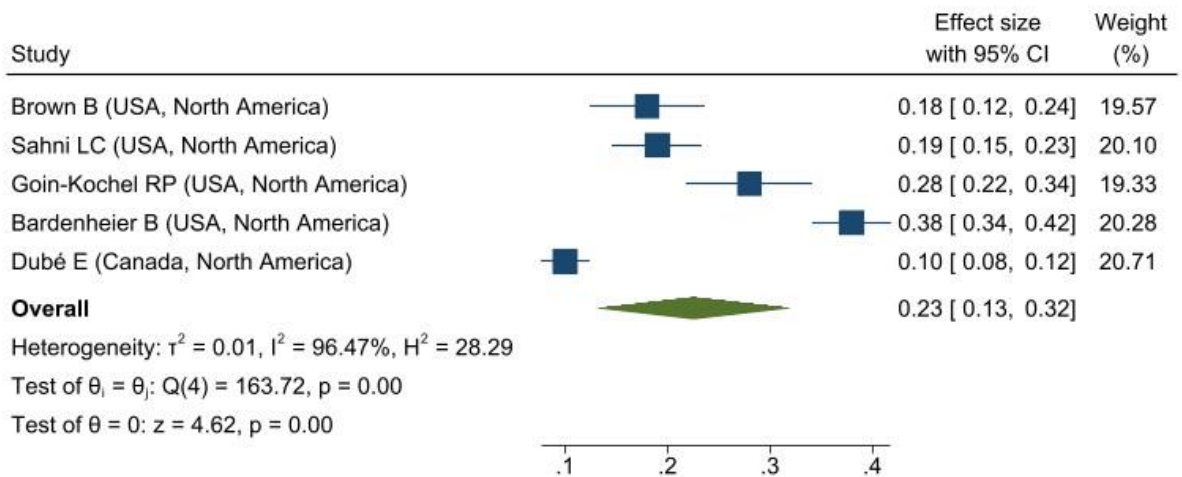

Random-effects REML model

iii. *North America region*

## 8) Not stated vaccine

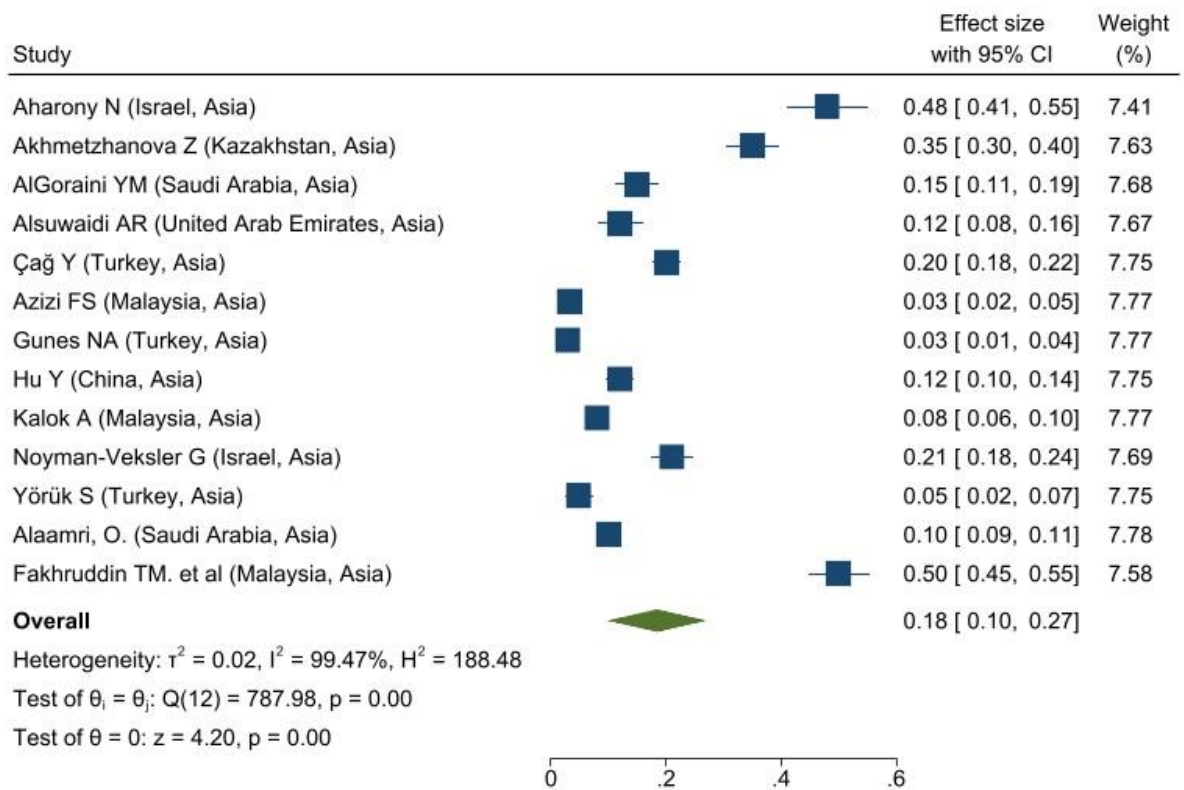

Random-effects REML model

### i. Asia region

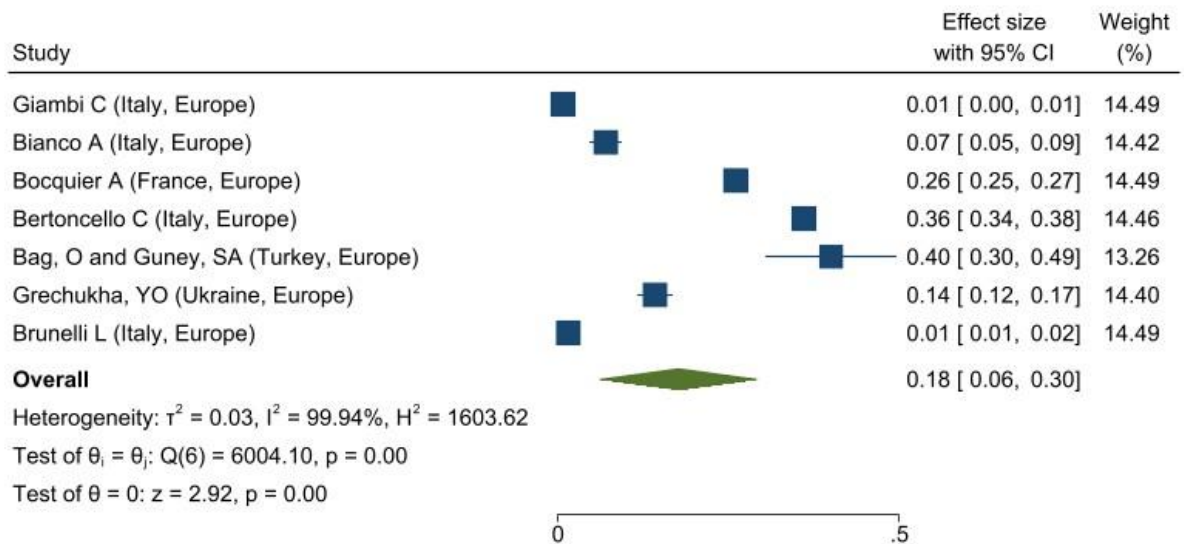

Random-effects REML model

### ii. Europe region

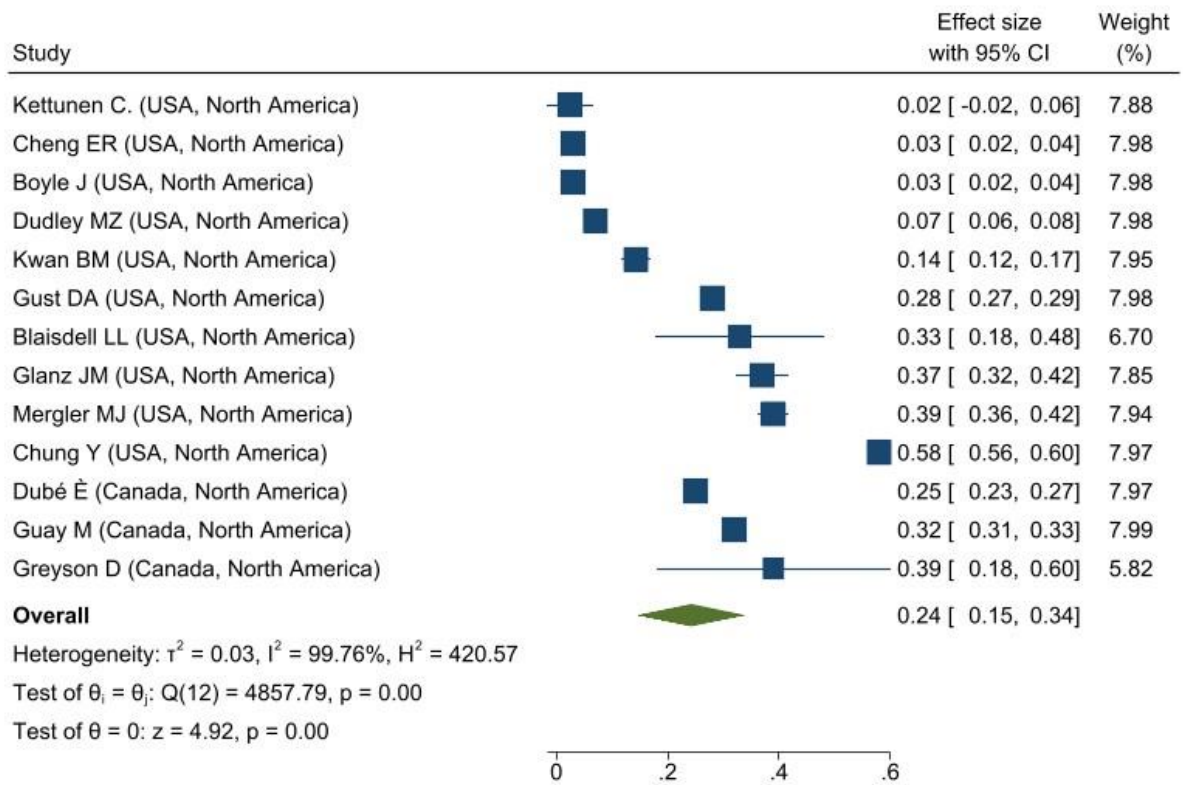

Random-effects REML model

iii. *North America region*

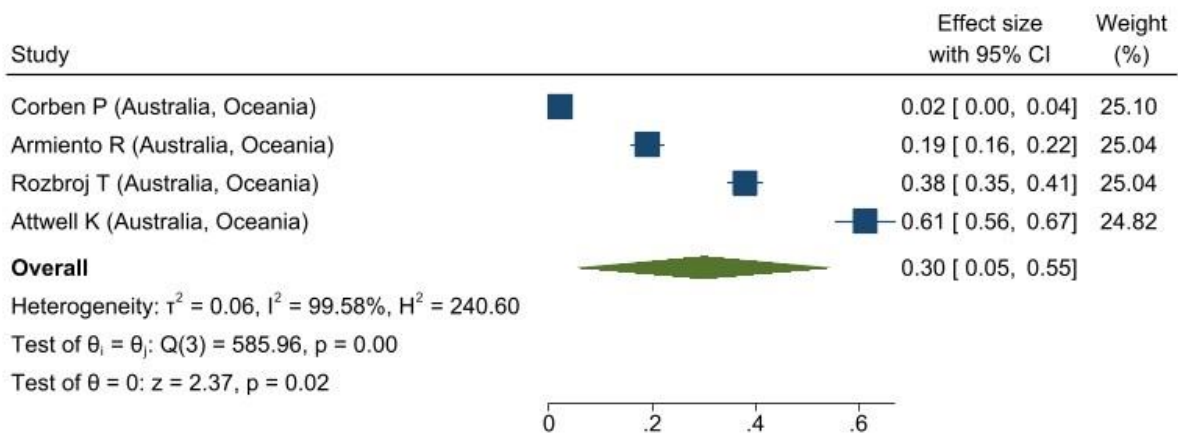

Random-effects REML model

iv. *Oceania region*
