# Supplementary material for: Prevalence of caregiver hesitancy for vaccinations in children and its associated factors: A systematic review and meta-analysis
Source: PubMed Central journal article supplement (PMC11500859; doi:10.1371/journal.pone.0302379), 2024-10-24
Supplement: pone.0302379.s005.pdf [file pone.0302379.s005.pdf]

**S1 Table: Key Search Strategy Vaccine hesitancy**

| Key search strategy                                                                                                                                                                                                                                                                                                                                                                                                                                                                                                                                                                                                                                                                                                                                                                                                                                                                                                                                                                                                                                                                                                                                                                                                                                                                                                                                                                                                                                                                                                                                                                                                                                                                                                                                                                                                                                                                                                                                                                                                                                                                                                                                                                                                                                                                                                                                                                                                                                                                                                                                                                                                                | Search date                        |
|------------------------------------------------------------------------------------------------------------------------------------------------------------------------------------------------------------------------------------------------------------------------------------------------------------------------------------------------------------------------------------------------------------------------------------------------------------------------------------------------------------------------------------------------------------------------------------------------------------------------------------------------------------------------------------------------------------------------------------------------------------------------------------------------------------------------------------------------------------------------------------------------------------------------------------------------------------------------------------------------------------------------------------------------------------------------------------------------------------------------------------------------------------------------------------------------------------------------------------------------------------------------------------------------------------------------------------------------------------------------------------------------------------------------------------------------------------------------------------------------------------------------------------------------------------------------------------------------------------------------------------------------------------------------------------------------------------------------------------------------------------------------------------------------------------------------------------------------------------------------------------------------------------------------------------------------------------------------------------------------------------------------------------------------------------------------------------------------------------------------------------------------------------------------------------------------------------------------------------------------------------------------------------------------------------------------------------------------------------------------------------------------------------------------------------------------------------------------------------------------------------------------------------------------------------------------------------------------------------------------------------|------------------------------------|
| <p>The databases searched include PubMed, Google Scholar, ProQuest and Cochrane library.</p> <p><b>Keywords using PubMed Search</b></p> <p>1 Vaccine* Refusal* [Title/Abstract]<br/>           2 Anti Vaccination Movement* [Title/Abstract]<br/>           3 Anti vaccin* [Title/Abstract]<br/>           4 Antivaccin*[Title/Abstract]<br/>           5 Vaccin*[Title/Abstract]<br/>           6 Vaccination [Title/Abstract]<br/>           7 Mass Vaccination*[Title/Abstract]<br/>           8 Immunization [Title/Abstract]<br/>           9 Immunization Program* [Title/Abstract]<br/>           10 Treatment Refusal* [Title/Abstract]<br/>           11 Patient Acceptance of vaccin* [Title/Abstract]<br/>           12 Attitude to vaccin* [Title/Abstract]<br/>           13 Health* [Title/Abstract]<br/>           14 Knowledge* [Title/Abstract]<br/>           15 Vaccin* Practice [Title/Abstract]<br/>           16 Vaccin* Coverage* [Title/Abstract]<br/>           17 Vaccine* Refusal*[Title/Abstract] or Anti Vaccination Movement* [Title/Abstract]or Anti vaccin*[Title/Abstract]or Antivaccin*[Title/Abstract] or Vaccin*[Title/Abstract] or Vaccination[Title/Abstract] or Mass Vaccination*[Title/Abstract] or Immunization[Title/Abstract] or Immunization Program*[Title/Abstract] or Treatment Refusal*[Title/Abstract] or Patient Acceptance of vaccin*[Title/Abstract] or Attitude to vaccin*[Title/Abstract]or Health* Knowledge*[Title/Abstract] or Vaccin* Practice [Title/Abstract]or Vaccin* Coverage* [Title/Abstract]<br/>           18 Child*[Title/Abstract]<br/>           19 Preschool*[Title/Abstract]<br/>           20 Infant*[Title/Abstract]<br/>           21 Newborn*[Title/Abstract]<br/>           22 Neonat*[Title/Abstract]<br/>           23 Baby*[Title/Abstract]<br/>           24 Toddler*[Title/Abstract]<br/>           25 Young adult*[Title/Abstract]<br/>           26 Teenager*[Title/Abstract]<br/>           27 Child*[Title/Abstract] or Preschool*[Title/Abstract] or Infant*[Title/Abstract] or Newborn*[Title/Abstract] or Neonat*[Title/Abstract] or Baby* [Title/Abstract]or Toddler*[Title/Abstract] or Young adult*[Title/Abstract] or Teenager*[Title/Abstract]<br/>           28 Parent*[Title/Abstract]<br/>           29 Guardian*[Title/Abstract]<br/>           30 Caregiver*[Title/Abstract]<br/>           31 Mother*[Title/Abstract]<br/>           32 Father*[Title/Abstract]<br/>           33 Parent*[Title/Abstract] or Guardian*[Title/Abstract] or Caregiver*[Title/Abstract] or Mother*[Title/Abstract] or Father*[Title/Abstract]</p> | <p>January 2023 to August 2023</p> |

|                                                                                                                                                                                                                                                                                                                                                                                                                                                                                                                                                                                                                                                                                                                                                                                                                                                                                                                                   |  |
|-----------------------------------------------------------------------------------------------------------------------------------------------------------------------------------------------------------------------------------------------------------------------------------------------------------------------------------------------------------------------------------------------------------------------------------------------------------------------------------------------------------------------------------------------------------------------------------------------------------------------------------------------------------------------------------------------------------------------------------------------------------------------------------------------------------------------------------------------------------------------------------------------------------------------------------|--|
| 30 Vaccine* Refusal* [Title/Abstract]or Anti Vaccination Movement* [Title/Abstract]or Anti vaccin*[Title/Abstract]or Antivaccin*[Title/Abstract]or Vaccin*[Title/Abstract] or Vaccination or Mass Vaccination*[Title/Abstract] or Immunization or Immunization Program*[Title/Abstract] or Treatment Refusal*[Title/Abstract] or Patient Acceptance of vaccin*[Title/Abstract] or Attitude to vaccin*[Title/Abstract]or Health* Knowledge*[Title/Abstract] or Vaccin* Practice[Title/Abstract] or Vaccin* [Title/Abstract]AND Child*[Title/Abstract] or Preschool*[Title/Abstract] or Infant*[Title/Abstract] or Newborn* [Title/Abstract]or Neonat*[Title/Abstract] or Baby* [Title/Abstract]or Toddler*[Title/Abstract] or Young adult* [Title/Abstract]or Teenager*[Title/Abstract]AND Parent*[Title/Abstract] or Guardian*[Title/Abstract] or Caregiver*[Title/Abstract] or Mother*[Title/Abstract]or Father*[Title/Abstract] |  |
|-----------------------------------------------------------------------------------------------------------------------------------------------------------------------------------------------------------------------------------------------------------------------------------------------------------------------------------------------------------------------------------------------------------------------------------------------------------------------------------------------------------------------------------------------------------------------------------------------------------------------------------------------------------------------------------------------------------------------------------------------------------------------------------------------------------------------------------------------------------------------------------------------------------------------------------|--|

Note: This review not applied the MESH term during the search strategy.
