# Supplementary material for: Prevalence of caregiver hesitancy for vaccinations in children and its associated factors: A systematic review and meta-analysis
Source: PubMed Central journal article supplement (PMC11500859; doi:10.1371/journal.pone.0302379), 2024-10-24
Supplement: pone.0302379.s006.pdf [file pone.0302379.s006.pdf]

**S2 Table: Search Strategy Vaccine hesitancy using CoCoPop**

|            |                      |                                                                                                                                              |
|------------|----------------------|----------------------------------------------------------------------------------------------------------------------------------------------|
| <b>Co</b>  | Condition or problem | Prevalence estimates of caregiver hesitancy                                                                                                  |
| <b>Co</b>  | Context              | Contributing to the outcome such as caregiver knowledge, information, attitudes, safety and efficiency as well as beliefs regarding vaccines |
| <b>PoP</b> | Population           | Parents; caregivers; guardians; mothers; fathers; infant; child; preschool child; adolescent; young adult                                    |
