# Supplementary material for: Prevalence of caregiver hesitancy for vaccinations in children and its associated factors: A systematic review and meta-analysis
Source: PubMed Central journal article supplement (PMC11500859; doi:10.1371/journal.pone.0302379), 2024-10-24
Supplement: pone.0302379.s007.pdf [file pone.0302379.s007.pdf]

**S3 Table: Data collection form**

| No | Author                | Year of publication | Country      | Region | Study design    | Total of number responders | Religious belief | Knowledge | Information | Safety and efficacy | Others | Type of vaccine assess |
|----|-----------------------|---------------------|--------------|--------|-----------------|----------------------------|------------------|-----------|-------------|---------------------|--------|------------------------|
| 1  | Kyei-Arthur, F        | 2022                | Ghana        | Africa | Cross sectional | 415                        | No               | Yes       | Yes         | Yes                 | Yes    | Covid-19               |
| 2  | Al-Wutayd, O          | 2022                | Egypt        | Africa | Cross sectional | 1458                       | No               | Yes       | Yes         | Yes                 | Yes    | Covid-19               |
| 3  | Carcelen, AC          | 2022                | Zimbabwe     | Africa | Cross sectional | 2400                       | No               | Yes       | Yes         | Yes                 | No     | Covid-19               |
| 4  | Muluye, M             | 2022                | Ethiopia     | Africa | Cross sectional | 874                        | No               | Yes       | Yes         | Yes                 | Yes    | Covid-19               |
| 5  | Lubeya M.K. et al.,   | 2023                | Zambia       | Africa | Cross sectional | 400                        | No               | Yes       | No          | No                  | No     | HPV                    |
| 6  | Balogun, FM           | 2022                | Nigeria      | Africa | Cross sectional | 678                        | No               | Yes       | Yes         | Yes                 | Yes    | HPV                    |
| 7  | Elit L                | 2022                | Cameroon     | Africa | Cross sectional | 45                         | No               | Yes       | Yes         | Yes                 | Yes    | HPV                    |
| 8  | Horn, S               | 2022                | Kenya        | Africa | Cross sectional | 600                        | No               | No        | No          | Yes                 | No     | HPV                    |
| 9  | Kolek, C. O.          | 2022                | Kenya        | Africa | Cross sectional | 195                        | Yes              | No        | Yes         | Yes                 | Yes    | HPV                    |
| 10 | Mihretic, G. N.       | 2022                | Ethiopia     | Africa | Cross sectional | 638                        | No               | Yes       | Yes         | Yes                 | Yes    | HPV                    |
| 11 | Milondzo T. et al.,   | 2022                | South Africa | Africa | Cross sectional | 320                        | No               | No        | Yes         | Yes                 | Yes    | HPV                    |
| 12 | Popelsky, BK          | 2021                | Ghana        | Africa | Cross sectional | 380                        | Yes              | No        | Yes         | Yes                 | Yes    | HPV                    |
| 13 | Kamya, C              | 2022                | Uganda       | Africa | Cross sectional | 590                        | No               | Yes       | Yes         | Yes                 | Yes    | Mix                    |
| 14 | Darebo, TD            | 2022                | Ethiopia     | Africa | Cross sectional | 657                        | No               | Yes       | Yes         | Yes                 | No     | Mix                    |
| 15 | Abor J                | 2022                | Uganda       | Africa | Cross sectional | 420                        | No               | Yes       | Yes         | Yes                 | Yes    | Mix                    |
| 16 | Kemeugni Ngandjon, J. | 2022                | Cameroon     | Africa | Cross sectional | 160                        | Yes              | Yes       | Yes         | Yes                 | Yes    | Mix                    |
| 17 | Killion JP            | 2022                | South Africa | Africa | Cross sectional | 317                        | No               | No        | Yes         | Yes                 | Yes    | Mix                    |
| 18 | Tayu B                | 2022                | Ethiopia     | Africa | Cross sectional | 633                        | No               | Yes       | Yes         | No                  | Yes    | Mix                    |
| 19 | Idris, I. O.          | 2022                | Sudan        | Africa | Cross sectional | 428                        | No               | No        | Yes         | Yes                 | No     | Mix                    |
| 20 | Jalloh, MF            | 2022                | Sierra Leone | Africa | Cross sectional | 16                         | No               | Yes       | Yes         | Yes                 | Yes    | Mix                    |
| 21 | Powelson, J           | 2022                | Mozambique   | Africa | Cross sectional | 32                         | No               | No        | Yes         | Yes                 | Yes    | Mix                    |
| 22 | Olaniyan, A. et al.,  | 2022                | Nigeria      | Africa | Cross sectional | 44                         | No               | Yes       | Yes         | Yes                 | Yes    | Mix                    |
| 23 | Ames, H.              | 2021                | Cameroon     | Africa | Cross sectional | 199                        | No               | Yes       | Yes         | Yes                 | No     | Mix                    |
| 24 | Vasudevan L           | 2020                | Tanzania     | Africa | Cross sectional | 134                        | Yes              | Yes       | Yes         | Yes                 | No     | Mix                    |
| 25 | Kagone, M             | 2018                | Burkina Faso | Africa | Cross sectional | 32                         | No               | Yes       | Yes         | Yes                 | Yes    | Mix                    |
| 26 | Abakar, M.F.          | 2018                | Chad         | Africa | Cross sectional | 47                         | No               | No        | Yes         | Yes                 | No     | Mix                    |
| 27 | Tadesse, T.           | 2017                | Ethiopia     | Africa | Cross sectional | 693                        | No               | Yes       | Yes         | Yes                 | Yes    | Mix                    |
| 28 | Handy, LK             | 2017                | Botswana     | Africa | Cross sectional | 96                         | No               | Yes       | Yes         | No                  | No     | Mix                    |
| 29 | Tabana, H             | 2016                | South Africa | Africa | Cross sectional | 229                        | No               | Yes       | Yes         | Yes                 | No     | Mix                    |
| 30 | Zewdie, A             | 2016                | Ethiopia     | Africa | Cross sectional | 28                         | No               | Yes       | Yes         | Yes                 | Yes    | Mix                    |
| 31 | Babirye, J.N          | 2011                | Uganda       | Africa | Cross sectional | 73                         | No               | No        | Yes         | Yes                 | Yes    | Mix                    |
| 32 | Schwarz, NG           | 2009                | Gabon        | Africa | Cross sectional | 262                        | No               | No        | No          | Yes                 | Yes    | Mix                    |
| 33 | Tadesse, H.           | 2009                | Ethiopia     | Africa | Cross sectional | 6                          | No               | Yes       | Yes         | Yes                 | Yes    | Mix                    |
| 34 | Leach, MA             | 2008                | Guinea       | Africa | Cross sectional | 1550                       | No               | Yes       | Yes         | Yes                 | No     | Mix                    |
| 35 | Cassell, JA           | 2006                | Gambia       | Africa | Cross sectional | 1600                       | No               | Yes       | Yes         | Yes                 | Yes    | Mix                    |
| 36 | Helman, CG            | 2004                | Transkei     | Africa | Cross sectional | 60                         | No               | Yes       | Yes         | Yes                 | Yes    | Mix                    |
| 37 | Eng, E.               | 1991                | Togo         | Africa | Cross sectional | 110                        | No               | Yes       | Yes         | No                  | No     | Mix                    |
| 38 | Cutts, FT             | 1990                | Guinea       | Africa | Cross sectional | 24                         | No               | Yes       | Yes         | Yes                 | Yes    | Mix                    |
| 39 | Griffith, BC          | 2022                | Uganda       | Africa | Cross sectional | 999                        | No               | Yes       | No          | No                  | Yes    | MMR                    |
| 40 | Hailu, C.             | 2022                | Ethiopia     | Africa | Case control    | 487                        | No               | Yes       | Yes         | Yes                 | Yes    | MMR                    |
| 41 | Sababelzain, M.M.     | 2022                | Sudan        | Africa | Cross sectional | 495                        | No               | Yes       | Yes         | Yes                 | No     | MMR                    |

|    |                          |      |                |               |                 |       |     |     |     |     |     |            |
|----|--------------------------|------|----------------|---------------|-----------------|-------|-----|-----|-----|-----|-----|------------|
| 42 | Gil Cuesta, JG           | 2021 | Guinea         | Africa        | Cross sectional | 68    | Yes | Yes | No  | Yes | No  | MMR        |
| 43 | Machekanyanga Z          | 2017 | Zimbabwe       | Africa        | Case control    | 90    | Yes | Yes | Yes | Yes | No  | MMR        |
| 44 | Cockcroft, A             | 2014 | Nigeria        | Africa        | Cross sectional | 2836  | No  | Yes | Yes | Yes | Yes | MMR        |
| 45 | Asmare, G.               | 2022 | Ethiopia       | Africa        | Cross sectional | 635   | No  | Yes | Yes | Yes | Yes | Not stated |
| 46 | Dejene, H.               | 2022 | Ethiopia       | Africa        | Cross sectional | 413   | No  | Yes | Yes | Yes | Yes | Not stated |
| 47 | Mebrate, M.              | 2022 | Ethiopia       | Africa        | Cross sectional | 664   | No  | Yes | Yes | Yes | No  | Not stated |
| 48 | Abdullahi MF             | 2020 | Somalia        | Africa        | Cross sectional | 48    | Yes | Yes | Yes | Yes | No  | Not stated |
| 49 | Tefera YA                | 2018 | Ethiopia       | Africa        | Cross sectional | 484   | Yes | Yes | Yes | Yes | No  | Not stated |
| 50 | Mcknight, J and Holt, DB | 2014 | Ethiopia       | Africa        | Cross sectional | 83    | No  | Yes | Yes | No  | Yes | Not stated |
| 51 | Dugas M                  | 2009 | Burkina Faso   | Africa        | Cross sectional | 2052  | Yes | Yes | Yes | Yes | No  | Not stated |
| 52 | Antai D                  | 2008 | Nigeria        | Africa        | Cross sectional | 9966  | Yes | Yes | Yes | Yes | No  | Not stated |
| 53 | Sulaiman S.K. et al.,    | 2023 | Nigeria        | Africa        | Cross sectional | 3377  | Yes | No  | No  | Yes | Yes | Others     |
| 54 | Asmare, G.               | 2022 | Ethiopia       | Africa        | Cross sectional | 406   | Yes | Yes | Yes | Yes | Yes | Others     |
| 55 | Yeboah, D.               | 2022 | Ghana          | Africa        | Cross sectional | 422   | No  | Yes | Yes | Yes | No  | Others     |
| 56 | Immurana, M              | 2021 | Ghana          | Africa        | Cross sectional | 3004  | No  | Yes | Yes | Yes | Yes | Others     |
| 57 | Abubakar A               | 2019 | Nigeria        | Africa        | Case Control    | 465   | Yes | Yes | Yes | Yes | No  | Others     |
| 58 | Fleming, JA              | 2019 | Malawi         | Africa        | Cross sectional | 274   | No  | Yes | Yes | Yes | Yes | Others     |
| 59 | Stamidis, KV             | 2019 | Ethiopia       | Africa        | Cross sectional | 151   | No  | Yes | Yes | Yes | No  | Others     |
| 60 | Umeh GC                  | 2018 | Nigeria        | Africa        | Cross sectional | 396   | Yes | Yes | Yes | Yes | No  | Others     |
| 61 | Closser, S               | 2016 | Ethiopia       | Africa        | Cross sectional | 50    | Yes | No  | Yes | No  | Yes | Others     |
| 62 | Giles-Vernick, T         | 2016 | Burkina Faso   | Africa        | Cross sectional | 68    | No  | Yes | Yes | Yes | No  | Others     |
| 63 | Mohammed A               | 2014 | Nigeria        | Africa        | Case control    | 121   | Yes | Yes | Yes | Yes | No  | Others     |
| 64 | Obute JA                 | 2007 | Nigeria        | Africa        | Cross sectional | 353   | Yes | Yes | Yes | Yes | No  | Others     |
| 65 | Renne, E                 | 2006 | Nigeria        | Africa        | Cross sectional | 27    | Yes | Yes | No  | Yes | No  | Others     |
| 66 | Yousaf A. R.             | 2023 | United State   | North America | Cohort study    | 94    | No  | No  | Yes | Yes | No  | Covid-19   |
| 67 | Wigle J.                 | 2023 | Canada         | North America | Cross sectional | 20    | No  | Yes | Yes | Yes | Yes | Covid-19   |
| 68 | Allen, JD                | 2023 | United State   | North America | Cross sectional | 591   | No  | Yes | Yes | Yes | Yes | Covid-19   |
| 69 | Arrigoni, L              | 2023 | United State   | North America | Cohort study    | 28    | No  | No  | Yes | Yes | No  | Covid-19   |
| 70 | Batra, K.                | 2023 | United State   | North America | Cross sectional | 263   | No  | Yes | Yes | Yes | Yes | Covid-19   |
| 71 | Davidson, CA et al       | 2023 | Canada         | North America | Cross sectional | 129   | No  | Yes | Yes | Yes | Yes | Covid-19   |
| 72 | Durkin, LK               | 2023 | United State   | North America | Cross sectional | 144   | No  | No  | Yes | Yes | Yes | Covid-19   |
| 73 | Gooding, GD et al        | 2023 | Canada         | North America | Cross sectional | 146   | No  | No  | Yes | Yes | No  | Covid-19   |
| 74 | Mondal P & Sinharoy A    | 2023 | United State   | North America | Cross sectional | 2622  | No  | No  | Yes | Yes | Yes | Covid-19   |
| 75 | Kohler, RE et al         | 2023 | United State   | North America | Cross sectional | 22    | No  | No  | Yes | Yes | Yes | Covid-19   |
| 76 | Shen A.K.                | 2022 | United State   | North America | Cross sectional | 971   | No  | No  | Yes | Yes | Yes | Covid-19   |
| 77 | Hill, AV                 | 2022 | United State   | North America | Cross sectional | 299   | No  | No  | No  | No  | No  | Covid-19   |
| 78 | Zhu, Y                   | 2022 | United State   | North America | Cross sectional | 714   | No  | Yes | Yes | Yes | No  | Covid 19   |
| 79 | Phan TL                  | 2022 | United America | North America | Cross sectional | 513   | No  | Yes | Yes | Yes | No  | Covid-19   |
| 80 | Ali S                    | 2022 | Canada         | North America | Cross sectional | 331   | No  | Yes | Yes | No  | Yes | Covid-19   |
| 81 | Baumer-Mouradian, S.H.   | 2022 | United State   | North America | Cross sectional | 4393  | No  | No  | Yes | Yes | No  | Covid-19   |
| 82 | Cioffredi, LA            | 2022 | United State   | North America | Cross sectional | 78    | No  | Yes | Yes | Yes | Yes | Covid-19   |
| 83 | de St Maurice, A.        | 2022 | United State   | North America | Cross sectional | 12288 | No  | Yes | Yes | Yes | No  | Covid-19   |
| 84 | Delgado, JR              | 2022 | United State   | North America | Cross sectional | 1051  | No  | Yes | No  | No  | Yes | Covid-19   |
| 85 | Drouin, O.               | 2022 | Canada         | North America | Cross sectional | 305   | No  | Yes | Yes | Yes | No  | Covid-19   |
| 86 | Egbert N                 | 2022 | United State   | North America | Cross sectional | 702   | No  | Yes | No  | Yes | No  | Covid-19   |
| 87 | Goulding, M              | 2022 | United State   | North America | Cross sectional | 67    | No  | Yes | Yes | Yes | No  | Covid-19   |

|     |                             |      |              |               |                 |       |     |     |     |     |     |          |
|-----|-----------------------------|------|--------------|---------------|-----------------|-------|-----|-----|-----|-----|-----|----------|
| 88  | Gray A                      | 2022 | United State | North America | Cross sectional | 242   | No  | Yes | Yes | Yes | Yes | Covid-19 |
| 89  | Guerin, RJ                  | 2022 | United State | North America | Cross sectional | 7298  | No  | No  | No  | No  | Yes | Covid-19 |
| 90  | Hammershaimb, EA            | 2022 | United State | North America | Cross sectional | 3230  | No  | Yes | Yes | Yes | No  | Covid-19 |
| 91  | Head, K.J                   | 2022 | United State | North America | Cross sectional | 10266 | No  | No  | Yes | Yes | No  | Covid-19 |
| 92  | Hopfer, S                   | 2022 | United State | North America | Cross sectional | 46    | No  | Yes | Yes | Yes | Yes | Covid-19 |
| 93  | Humble, RM                  | 2022 | Canada       | North America | Cross sectional | 1129  | No  | Yes | Yes | Yes | Yes | Covid-19 |
| 94  | Kreuter, MW                 | 2022 | United State | North America | Cross sectional | 1951  | No  | No  | No  | Yes | No  | Covid-19 |
| 95  | Lam, C.N                    | 2022 | United State | North America | Cross sectional | 401   | No  | Yes | Yes | Yes | No  | Covid-19 |
| 96  | Limbers, CA                 | 2022 | United State | North America | Cross sectional | 821   | No  | Yes | Yes | Yes | No  | Covid-19 |
| 97  | Mangat, C                   | 2022 | United State | North America | Cross sectional | 1301  | No  | No  | No  | Yes | No  | Covid-19 |
| 98  | McElfish, P.A.              | 2022 | United State | North America | Cross sectional | 369   | No  | Yes | Yes | Yes | No  | Covid-19 |
| 99  | Nguyen, KH                  | 2022 | United State | North America | Cross sectional | 11478 | No  | Yes | Yes | Yes | Yes | Covid-19 |
| 100 | Nguyen, KH                  | 2022 | United State | North America | Cross sectional | 59424 | No  | No  | No  | Yes | Yes | Covid-19 |
| 101 | Panchalingam, T.            | 2022 | United State | North America | Cross sectional | 1456  | No  | Yes | Yes | Yes | No  | Covid-19 |
| 102 | Reindl, D.                  | 2022 | United State | North America | Cross sectional | 582   | No  | No  | Yes | Yes | No  | Covid-19 |
| 103 | Salazar, TL                 | 2022 | United State | North America | Cross sectional | 93    | No  | Yes | Yes | Yes | No  | Covid-19 |
| 104 | Scherer, AM                 | 2022 | United State | North America | Cross sectional | 2031  | No  | Yes | Yes | Yes | No  | Covid-19 |
| 105 | Schiff, J.                  | 2022 | United State | North America | Cross sectional | 58    | No  | Yes | Yes | Yes | Yes | Covid-19 |
| 106 | Schilling, S                | 2022 | United State | North America | Cross sectional | 50    | No  | Yes | Yes | Yes | No  | Covid-19 |
| 107 | Skeens, M.                  | 2022 | United State | North America | Cross sectional | 113   | No  | Yes | Yes | Yes | No  | Covid-19 |
| 108 | Skeens, M. A.               | 2022 | United State | North America | Cross sectional | 491   | No  | No  | Yes | Yes | Yes | Covid-19 |
| 109 | Srivastava, T               | 2022 | United State | North America | Cohort study    | 334   | No  | Yes | Yes | Yes | Yes | Covid-19 |
| 110 | Suvada, KA                  | 2022 | United State | North America | Cross sectional | 6068  | No  | Yes | Yes | Yes | Yes | Covid-19 |
| 111 | Temple, AM                  | 2022 | United State | North America | Cross sectional | 204   | No  | Yes | Yes | Yes | No  | Covid-19 |
| 112 | Willis, DE                  | 2022 | United State | North America | Cross sectional | 665   | No  | No  | No  | No  | No  | Covid-19 |
| 113 | Ruiz JB                     | 2022 | United State | North America | Cross sectional | 637   | No  | Yes | Yes | Yes | Yes | Covid-19 |
| 114 | Lacy, R.                    | 2022 | United State | North America | Cross sectional | 41    | No  | Yes | Yes | Yes | No  | Covid-19 |
| 115 | Lessard, L                  | 2022 | United State | North America | Cross sectional | 168   | No  | Yes | Yes | Yes | No  | Covid-19 |
| 116 | Bonuck, K                   | 2022 | United State | North America | Cross sectional | 352   | No  | Yes | Yes | Yes | Yes | Covid-19 |
| 117 | Byrne, A                    | 2022 | United State | North America | Cross sectional | 2620  | No  | Yes | Yes | Yes | No  | Covid-19 |
| 118 | Dayton, L.                  | 2022 | United State | North America | Cohort study    | 297   | No  | Yes | Yes | Yes | Yes | Covid-19 |
| 119 | Ellithorpe, ME              | 2022 | United State | North America | Cross sectional | 682   | No  | No  | Yes | Yes | No  | Covid-19 |
| 120 | Fisher, C.B.                | 2022 | United State | North America | Cross sectional | 411   | No  | Yes | Yes | Yes | Yes | Covid-19 |
| 121 | O'Dor SL                    | 2022 | United State | North America | Cross sectional | 254   | No  | No  | Yes | Yes | No  | Covid-19 |
| 122 | M. Baumann, B               | 2022 | United State | North America | Cross sectional | 1298  | Yes | Yes | Yes | Yes | No  | Covid-19 |
| 123 | Santibanez, TA              | 2022 | United State | North America | Cross sectional | 4496  | No  | Yes | Yes | Yes | Yes | Covid-19 |
| 124 | Wang, CH                    | 2022 | United State | North America | Cross sectional | 121   | No  | Yes | Yes | Yes | No  | Covid-19 |
| 125 | Yeo, J                      | 2022 | Canada       | North Amerika | Cross sectional | 23    | No  | Yes | Yes | Yes | No  | Covid-19 |
| 126 | Olagoke, A.                 | 2022 | United State | North America | Cross sectional | 342   | Yes | No  | No  | Yes | No  | Covid-19 |
| 127 | Lachance-Grzela, M. et al., | 2022 | Canada       | North America | Cross sectional | 406   | No  | No  | Yes | Yes | Yes | Covid-19 |
| 128 | Wojcicki, JM et al          | 2022 | United State | North America | Cohort study    | 391   | No  | No  | Yes | Yes | Yes | Covid-19 |
| 129 | Kheil, M.H. et al.,         | 2022 | United State | North America | Cross sectional | 1746  | Yes | No  | No  | Yes | Yes | Covid-19 |
| 130 | Choi, K. et al.,            | 2022 | United State | North America | Cross sectional | 322   | No  | Yes | Yes | Yes | No  | Covid-19 |
| 131 | Alferi, N. L                | 2021 | United State | North America | Cross sectional | 1425  | No  | Yes | Yes | Yes | No  | Covid-19 |
| 132 | Humble, RM                  | 2021 | Canada       | North America | Cross sectional | 1702  | No  | Yes | Yes | Yes | No  | Covid-19 |
| 133 | Marquez, RR                 | 2021 | United State | North America | Cross sectional | 97    | No  | Yes | Yes | Yes | Yes | Covid-19 |

|     |                           |      |              |               |                 |       |     |     |     |     |     |          |
|-----|---------------------------|------|--------------|---------------|-----------------|-------|-----|-----|-----|-----|-----|----------|
| 134 | McKinnon, B.              | 2021 | Canada       | North America | Cross sectional | 809   | No  | Yes | Yes | Yes | No  | Covid-19 |
| 135 | Szilagy, PG               | 2021 | United State | North America | Cross sectional | 1745  | No  | Yes | Yes | Yes | No  | Covid-19 |
| 136 | Teasdale, CA              | 2021 | United State | North America | Cross sectional | 1119  | Yes | No  | No  | Yes | Yes | Covid-19 |
| 137 | Teasdale, CA              | 2021 | United State | North America | Cross sectional | 2074  | Yes | No  | No  | Yes | Yes | Covid-19 |
| 138 | Waring, M. E.             | 2022 | United State | North America | Cross sectional | 203   | No  | Yes | Yes | Yes | No  | Covid-19 |
| 139 | Delgado-Gallegos, J.L.    | 2021 | Mexico       | North America | Cross sectional | 699   | No  | Yes | Yes | Yes | No  | Covid-19 |
| 140 | Hetherington, E           | 2021 | Canada       | North Amerika | Cohort study    | 1321  | No  | Yes | Yes | Yes | Yes | Covid-19 |
| 141 | Lackner, CL               | 2021 | Canada       | North Amerika | Cross sectional | 455   | No  | No  | Yes | Yes | No  | Covid-19 |
| 142 | Middleman A.B. et al.,    | 2021 | United State | North America | Cohort study    | 500   | No  | No  | Yes | Yes | Yes | Covid-19 |
| 143 | Sokol, RL and Grummom, AH | 2020 | United State | North America | Cross sectional | 1893  | No  | No  | Yes | Yes | No  | Covid-19 |
| 144 | Davis, MM et al           | 2020 | United State | North America | Cross sectional | 1008  | No  | No  | Yes | Yes | No  | Covid-19 |
| 145 | Zhu X                     | 2023 | United State | North America | Cross sectional | 342   | No  | Yes | No  | Yes | Yes | HPV      |
| 146 | Shin, M.B.                | 2023 | United State | North America | Cross sectional | 20    | No  | Yes | Yes | Yes | Yes | HPV      |
| 147 | Jin, SW et al             | 2023 | United State | North America | Cross sectional | 497   | No  | Yes | No  | Yes | No  | HPV      |
| 148 | Anuforo, B.               | 2022 | United State | North America | Cross sectional | 77    | No  | Yes | Yes | Yes | No  | HPV      |
| 149 | Ayash, C                  | 2022 | United State | North America | Cross sectional | 162   | Yes | Yes | Yes | Yes | Yes | HPV      |
| 150 | Ayres, S                  | 2022 | United State | North America | Cross sectional | 99    | No  | Yes | No  | No  | No  | HPV      |
| 151 | Beavis, AL                | 2022 | United State | North America | Cross sectional | 22    | No  | Yes | Yes | Yes | Yes | HPV      |
| 152 | Chido-Amajuoyi, OG        | 2022 | United State | North America | Cross sectional | 38706 | No  | No  | No  | Yes | Yes | HPV      |
| 153 | Lee, G.                   | 2022 | United State | North America | Cross sectional | 275   | No  | No  | Yes | Yes | Yes | HPV      |
| 154 | Rositch, A. F.            | 2022 | United State | North America | Cross sectional | 13090 | No  | Yes | Yes | Yes | Yes | HPV      |
| 155 | Staras, SA                | 2022 | United State | North America | Cross sectional | 25    | No  | Yes | Yes | Yes | Yes | HPV      |
| 156 | Thompson, EL              | 2022 | United State | North America | Cross sectional | 1192  | No  | Yes | Yes | No  | No  | HPV      |
| 157 | Tsui, J.                  | 2022 | United State | North America | Cross sectional | 357   | No  | Yes | Yes | Yes | No  | HPV      |
| 158 | Varisco, T. J.            | 2022 | United State | North America | Cross sectional | 416   | No  | Yes | Yes | Yes | No  | HPV      |
| 159 | Vasudevan, L.             | 2022 | United State | North America | Cross sectional | 987   | No  | Yes | Yes | Yes | No  | HPV      |
| 160 | Vu, M                     | 2022 | United State | North America | Cross sectional | 32    | No  | Yes | Yes | Yes | Yes | HPV      |
| 161 | Xiong, S                  | 2022 | United State | North America | Cross sectional | 25    | No  | Yes | Yes | Yes | Yes | HPV      |
| 162 | Cui Z. et al.,            | 2022 | United State | North America | Cohort study    | 243   | No  | No  | Yes | Yes | No  | HPV      |
| 163 | Margolis M. A. et al.,    | 2022 | United State | North America | Cross sectional | 1263  | No  | No  | Yes | No  | Yes | HPV      |
| 164 | Dundar, Y.                | 2021 | United State | North America | Cross sectional | 150   | No  | Yes | Yes | Yes | No  | HPV      |
| 165 | Myhre A                   | 2020 | United State | North America | Cross sectional | 355   | Yes | Yes | Yes | Yes | No  | HPV      |
| 166 | Khodadadi AB              | 2020 | United State | North America | RCT             | 317   | Yes | Yes | Yes | Yes | No  | HPV      |
| 167 | Newcomer SR               | 2020 | United State | North America | Cross sectional | 71    | Yes | Yes | Yes | Yes | No  | HPV      |
| 168 | Pomares TD                | 2020 | United State | North America | Cross sectional | 1400  | Yes | Yes | Yes | Yes | No  | HPV      |
| 169 | Yankey D                  | 2020 | United State | North America | Cross sectional | 40929 | Yes | Yes | Yes | Yes | No  | HPV      |
| 170 | Duchscherer A. et al.,    | 2020 | United State | North America | Cross sectional | 343   | No  | Yes | Yes | Yes | Yes | HPV      |
| 171 | Auslander BA              | 2019 | United State | North America | Cross sectional | 50    | Yes | Yes | Yes | Yes | No  | HPV      |
| 172 | Hirth JM                  | 2019 | United State | North America | Cross sectional | 90866 | Yes | Yes | Yes | Yes | No  | HPV      |
| 173 | Thomas TL                 | 2019 | United State | North America | Cross sectional | 123   | Yes | Yes | Yes | Yes | No  | HPV      |
| 174 | Beavis A                  | 2018 | United State | North America | Cross sectional | 46853 | Yes | Yes | Yes | Yes | No  | HPV      |
| 175 | Hanson KE                 | 2018 | United State | North America | Cross sectional | 76971 | Yes | Yes | Yes | Yes | No  | HPV      |
| 176 | Krok-Schoen JL            | 2018 | United State | North America | Cross sectional | 337   | Yes | Yes | Yes | Yes | No  | HPV      |
| 177 | Lee Y.M                   | 2018 | United State | North America | Cross sectional | 74    | Yes | Yes | Yes | Yes | No  | HPV      |
| 178 | Albright K                | 2017 | United State | North America | Cross sectional | 41    | Yes | Yes | Yes | Yes | No  | HPV      |
| 179 | Brown B                   | 2017 | United State | North America | Cross sectional | 200   | Yes | Yes | Yes | Yes | No  | HPV      |

|     |                        |      |              |               |                 |       |     |     |     |     |     |           |
|-----|------------------------|------|--------------|---------------|-----------------|-------|-----|-----|-----|-----|-----|-----------|
| 180 | Gilkey MB              | 2017 | United State | North America | Cross sectional | 1484  | Yes | Yes | Yes | Yes | No  | HPV       |
| 181 | Thompson EL            | 2017 | United State | North America | Cross sectional | 59897 | Yes | Yes | Yes | Yes | No  | HPV       |
| 182 | Gilbert NL             | 2016 | Canada       | North America | Cross sectional | 5720  | Yes | Yes | Yes | Yes | No  | HPV       |
| 183 | Krawczyk A             | 2015 | Canada       | North America | Cross sectional | 806   | Yes | Yes | Yes | Yes | Yes | HPV       |
| 184 | Perez S                | 2015 | Canada       | North America | Cross sectional | 2874  | Yes | Yes | Yes | Yes | No  | HPV       |
| 185 | Dorell C               | 2014 | United State | North America | Cross sectional | 4103  | Yes | Yes | Yes | Yes | No  | HPV       |
| 186 | Staras SA              | 2014 | United State | North America | Cross sectional | 2127  | Yes | Yes | Yes | Yes | No  | HPV       |
| 187 | Pitts MJ               | 2013 | United State | North America | Cross sectional | 33    | Yes | Yes | Yes | Yes | No  | HPV       |
| 188 | Ogilvie G              | 2010 | Canada       | North America | Cross sectional | 2025  | Yes | Yes | Yes | Yes | No  | HPV       |
| 189 | Dempsey MF             | 2009 | United State | North America | Cross sectional | 52    | Yes | Yes | Yes | Yes | No  | HPV       |
| 190 | Brabin L               | 2008 | United State | North America | Cohort study    | 2817  | Yes | Yes | Yes | Yes | No  | HPV       |
| 191 | Toffolon-Weiss M       | 2008 | United State | North America | Cross sectional | 79    | Yes | Yes | Yes | Yes | No  | HPV       |
| 192 | Nguyen, AT             | 2022 | United State | North America | Cross sectional | 59424 | No  | No  | No  | Yes | Yes | Influenza |
| 193 | Fisher, W.A            | 2022 | Canada       | North America | Cohort study    | 207   | No  | Yes | Yes | Yes | Yes | Influenza |
| 194 | Beatty and Villwock    | 2021 | United State | North America | Cross sectional | 179   | No  | No  | Yes | Yes | No  | Influenza |
| 195 | Fogel BN               | 2020 | United State | North America | Cross sectional | 141   | Yes | Yes | Yes | Yes | No  | Influenza |
| 196 | Kempe A                | 2020 | United State | North America | Cross sectional | 2176  | Yes | Yes | Yes | Yes | No  | Influenza |
| 197 | Nekrasov E             | 2020 | United State | North America | Cross sectional | 257   | Yes | Yes | Yes | Yes | No  | Influenza |
| 198 | Goss MD                | 2020 | United State | North America | Cross sectional | 244   | Yes | Yes | Yes | Yes | No  | Influenza |
| 199 | Hofstetter AM          | 2018 | United State | North America | Cross sectional | 199   | Yes | Yes | Yes | Yes | No  | Influenza |
| 200 | Baumgaetner, B et al   | 2018 | United State | North America | Cross sectional | 1006  | No  | Yes | Yes | Yes | Yes | Influenza |
| 201 | Cameron MA             | 2016 | United State | North America | Cross sectional | 786   | Yes | Yes | Yes | Yes | No  | Influenza |
| 202 | Santibanez TA          | 2016 | United State | North America | Cross sectional | 3548  | Yes | Yes | Yes | Yes | No  | Influenza |
| 203 | Fuchs, EL              | 2016 | United State | North America | Cohort study    | 4022  | No  | No  | Yes | Yes | No  | Influenza |
| 204 | Strelitz B             | 2015 | United State | North America | Cross sectional | 152   | Yes | Yes | Yes | Yes | No  | Influenza |
| 205 | Frew PM                | 2011 | United State | North America | Cross sectional | 223   | Yes | Yes | Yes | Yes | No  | Influenza |
| 206 | Schellenberg, N.       | 2023 | Canada       | North America | Cross sectional | 6125  | Yes | Yes | No  | Yes | Yes | Mix       |
| 207 | Shen, AK               | 2023 | United State | North America | Cross sectional | 41    | Yes | Yes | Yes | Yes | Yes | Mix       |
| 208 | Baumer-Mouradian, S.H. | 2022 | United State | North America | Cross sectional | 589   | No  | Yes | Yes | Yes | Yes | Mix       |
| 209 | Ellithorpe, M          | 2022 | United State | North America | Cross sectional | 779   | No  | No  | No  | Yes | No  | Mix       |
| 210 | Freeman RE             | 2022 | United State | North America | Cross sectional | 15333 | No  | No  | No  | No  | Yes | Mix       |
| 211 | He, K                  | 2022 | United State | North America | Cross sectional | 175   | No  | Yes | Yes | Yes | Yes | Mix       |
| 212 | Howell, JL             | 2022 | United State | North America | Cross sectional | 863   | Yes | Yes | Yes | Yes |     | Mix       |
| 213 | Hsu, C                 | 2022 | United State | North America | Cross sectional | 41    | No  | Yes | Yes | Yes | Yes | Mix       |
| 214 | Kaufmann J             | 2022 | United State | North America | Cross sectional | 35444 | No  | No  | No  | No  | No  | Mix       |
| 215 | Letterie MC            | 2022 | United State | North America | Cross sectional | 1066  | No  | No  | Yes | No  | Yes | Mix       |
| 216 | Nguyen, K.H            | 2022 | United State | North America | Cross sectional | 7645  | No  | Yes | Yes | Yes | Yes | Mix       |
| 217 | Opel, D. J.            | 2022 | United State | North America | Cross sectional | 4562  | No  | No  | Yes | Yes | No  | Mix       |
| 218 | Shah, MD               | 2022 | United State | North America | Cross sectional | 1009  | No  | Yes | No  | Yes | No  | Mix       |
| 219 | Wang, CS               | 2022 | United State | North America | Cross sectional | 207   | No  | Yes | Yes | Yes | No  | Mix       |
| 220 | Anderson-Chavarria, M  | 2022 | Puerto Rico  | North America | Cross sectional | 35    | No  | No  | Yes | Yes | No  | Mix       |
| 221 | Boyce, TG              | 2022 | United State | North America | Cross sectional | 536   | Yes | Yes | Yes | Yes | No  | Mix       |
| 222 | Footman, A             | 2022 | United State | North America | Cross sectional | 21    | No  | Yes | Yes | Yes | Yes | Mix       |
| 223 | Cole J.W. et al.,      | 2022 | United State | North America | Cohort study    | 2504  | No  | No  | Yes | Yes | No  | Mix       |
| 224 | Gennaro, E et al       | 2021 | United State | North America | Cross sectional | 135   | No  | No  | Yes | Yes | Yes | Mix       |
| 225 | Newcomer S.R. et al.,  | 2021 | United State | North America | Cohort study    | 31422 | No  | No  | No  | No  | Yes | Mix       |

|     |                                     |      |              |               |                 |            |     |     |     |     |     |     |
|-----|-------------------------------------|------|--------------|---------------|-----------------|------------|-----|-----|-----|-----|-----|-----|
| 226 | Langkamp, DL et al                  | 2020 | United State | North America | Cross sectional | 63         | No  | No  | No  | Yes | Yes | Mix |
| 227 | Glanz, JM et al                     | 2020 | United State | North America | RCT             | 824        | No  | No  | Yes | Yes | No  | Mix |
| 228 | Navin MC                            | 2019 | United State | North America | Cross sectional | 4098       | Yes | Yes | Yes | Yes | No  | Mix |
| 229 | Carpiano RM                         | 2019 | Canada       | North America | Cross sectional | 12478      | Yes | Yes | Yes | Yes | No  | Mix |
| 230 | Deas J                              | 2018 | United State | North America | Cross sectional | 39         | Yes | Yes | Yes | Yes | No  | Mix |
| 231 | Gilkey MB                           | 2016 | United State | North America | Cross sectional | 9354       | Yes | Yes | Yes | Yes | No  | Mix |
| 232 | Gilkey MB                           | 2016 | United State | North America | Cross sectional | 9018       | Yes | Yes | Yes | Yes | No  | Mix |
| 233 | Wolf E. et al.,                     | 2016 | United State | North America | Cohort study    | 277098     | No  | No  | No  | No  | Yes | Mix |
| 234 | William S.E. et al.,                | 2016 | United State | North America | Cross sectional | 158        | No  | No  | No  | No  | No  | Mix |
| 235 | Frew, PM et al                      | 2016 | United State | North America | Cross sectional | 5121       | No  | No  | Yes | Yes | No  | Mix |
| 236 | Greenfield LS                       | 2015 | United State | North America | Cross sectional | 202        | Yes | Yes | Yes | Yes | No  | Mix |
| 237 | Roberts JR                          | 2015 | United State | North America | Cross sectional | 363        | Yes | Yes | Yes | Yes | No  | Mix |
| 238 | Wolff ER                            | 2014 | United State | North America | Cross sectional | 99         | Yes | Yes | Yes | Yes | No  | Mix |
| 239 | Darden PM                           | 2013 | United State | North America | Cross sectional | 98086      | Yes | Yes | Yes | Yes | No  | Mix |
| 240 | Gilkey MB                           | 2013 | United State | North America | Cross sectional | 1847       | Yes | Yes | Yes | Yes | No  | Mix |
| 241 | Opel D.J. et al.,                   | 2013 | United State | North America | Cross sectional | 437        | No  | No  | No  | Yes | Yes | Mix |
| 242 | Opel D.J. et al.,                   | 2013 | United State | North America | Cross sectional | 237        | No  | No  | Yes | Yes | Yes | Mix |
| 243 | Bazzano A                           | 2012 | United State | North America | Cross sectional | 197        | Yes | Yes | Yes | Yes | No  | Mix |
| 244 | Freed GL                            | 2010 | United State | North America | Cross sectional | 1552       | Yes | Yes | Yes | Yes | No  | Mix |
| 245 | Smith P.J. et al.,                  | 2010 | United State | North America | Cross sectional | 2921       | No  | No  | Yes | Yes | Yes | Mix |
| 246 | Salmon DA                           | 2009 | United State | North America | Cross sectional | 963        | Yes | Yes | Yes | Yes | No  | Mix |
| 247 | Wu AC                               | 2008 | United State | North America | Cross sectional | 228        | Yes | Yes | Yes | Yes | No  | Mix |
| 248 | Salmon DA                           | 2005 | United State | North America | Case control    | 1253       | Yes | Yes | Yes | Yes | No  | Mix |
| 249 | Bardenheier B                       | 2004 | United State | North America | Case control    | 2315       | Yes | Yes | Yes | Yes | No  | Mix |
| 250 | Xu, Y.                              | 2021 | United State | North America | Cross sectional | 1803       | No  | No  | Yes | Yes | Yes | MMR |
| 251 | Mensah-Bonsu, NE et al              | 2021 | United State | North America | Cross sectional | 89         | Yes | No  | No  | Yes | Yes | MMR |
| 252 | Doll, MK et al                      | 2021 | United State | North America | Cohort study    | 34,471,357 | No  | Yes | No  | No  | Yes | MMR |
| 253 | Holroyd T.A. et al.,                | 2021 | United State | North America | Cross sectional | 37         | No  | Yes | Yes | Yes | Yes | MMR |
| 254 | Wharton-Michael P & Wharton-Clark A | 2020 | United State | North America | Cross sectional | 20         | No  | No  | Yes | No  | No  | MMR |
| 255 | Rodriguez-Nava G. et al.,           | 2020 | United State | North America | Cross sectional | 158602     | No  | No  | No  | Yes | No  | MMR |
| 256 | Qian M. et al.,                     | 2020 | United State | North America | Cross sectional | 271487     | No  | No  | Yes | Yes | Yes | MMR |
| 257 | Mills, K et al                      | 2020 | United State | North America | Cross sectional | 89         | No  | Yes | Yes | Yes | Yes | MMR |
| 258 | Christianson, B et al               | 2020 | United State | North America | Cross sectional | 300        | No  | No  | Yes | Yes | Yes | MMR |
| 259 | Estep, K and Greenberg, P.          | 2020 | United State | North America | Cross sectional | 747        | No  | No  | No  | Yes | Yes | MMR |
| 260 | Nyathi S. et al.,                   | 2019 | United State | North America | Cross sectional | -          | No  | No  | No  | Yes | Yes | MMR |
| 261 | Moyer-Guse E. et al.,               | 2018 | United State | North America | Cross sectional | 187        | No  | No  | Yes | Yes | No  | MMR |
| 262 | Krishna A                           | 2017 | United State | North America | Cross sectional | 435        | Yes | Yes | Yes | Yes | No  | MMR |
| 263 | Kang G.J. et al.,                   | 2017 | United State | North America | Cross sectional | 50         | No  | No  | Yes | Yes | Yes | MMR |
| 264 | Cacciatore MA                       | 2016 | United State | North America | Cross sectional | 1000       | Yes | Yes | Yes | Yes | No  | MMR |
| 265 | Cataldi, JR et al                   | 2016 | United State | North America | Cross sectional | 306        | No  | Yes | No  | No  | No  | MMR |
| 266 | McNutt, LA                          | 2016 | United State | North America | Cross sectional | 565        | Yes | No  | No  | No  | Yes | MMR |
| 267 | Lieu, TA et al                      | 2015 | United State | North America | Cross sectional | 50233      | No  | Yes | Yes | Yes | No  | MMR |
| 268 | Nyhan B, et al                      | 2014 | United State | North America | Cross sectional | 4058       | No  | No  | Yes | Yes | No  | MMR |
| 269 | Gahr, P et al                       | 2014 | United State | North America | Cohort study    | 21         | No  | Yes | Yes | Yes | No  | MMR |
| 270 | Gowda C                             | 2013 | United State | North America | Cross sectional | 79         | Yes | Yes | Yes | Yes | No  | MMR |

|     |                        |      |              |               |                 |       |     |     |     |     |     |            |
|-----|------------------------|------|--------------|---------------|-----------------|-------|-----|-----|-----|-----|-----|------------|
| 271 | Downs, JS et al        | 2013 | United state | North America | Cross sectional | 30    | No  | Yes | Yes | Yes | No  | MMR        |
| 272 | Dempsey AF, et al.     | 2011 | United State | North America | Cross sectional | 748   | No  | No  | No  | Yes | No  | MMR        |
| 273 | Sugerman, DE et al     | 2010 | United State | North America | Cohort study    | 839   | No  | No  | Yes | Yes | No  | MMR        |
| 274 | Kennedy A.M & Gust D.A | 2008 | United State | North America | Cross sectional | 12    | Yes | Yes | Yes | Yes | Yes | MMR        |
| 275 | Parker A.A. et al.,    | 2006 | United State | North America | Cohort study    | 66    | No  | No  | No  | Yes | Yes | MMR        |
| 276 | Kwan, B. M.            | 2022 | United State | North America | RCT             | 824   | No  | No  | Yes | Yes | No  | Not stated |
| 277 | Boyle J                | 2020 | United State | North America | Cross sectional | 1029  | Yes | Yes | Yes | Yes | No  | Not stated |
| 278 | Buttenheim AM          | 2020 | United State | North America | Cross sectional | 257   | Yes | Yes | Yes | Yes | No  | Not stated |
| 279 | Dudley MZ              | 2020 | United State | North America | Cross sectional | 2196  | Yes | Yes | Yes | Yes | No  | Not stated |
| 280 | Finkelstein SR         | 2020 | United State | North America | Cross sectional | 300   | Yes | Yes | Yes | Yes | No  | Not stated |
| 281 | Mohanty S              | 2020 | United State | North America | Cross sectional | 140   | Yes | Yes | Yes | Yes | No  | Not stated |
| 282 | Buckman, C. et al      | 2020 | United State | North America | Cross sectional | -     | Yes | No  | No  | No  | Yes | Not stated |
| 283 | Arora G                | 2019 | United State | North America | Cross sectional | 87    | Yes | Yes | Yes | Yes | No  | Not stated |
| 284 | Cataldi JR             | 2019 | United State | North America | Cross sectional | 295   | Yes | Yes | Yes | Yes | No  | Not stated |
| 285 | Cheng ER               | 2019 | United State | North America | Cross sectional | 1047  | Yes | Yes | Yes | Yes | No  | Not stated |
| 286 | Eller NM               | 2019 | United State | North America | Cross sectional | 488   | Yes | Yes | Yes | Yes | No  | Not stated |
| 287 | McCoy JD               | 2019 | United State | North America | Cross sectional | 14    | Yes | Yes | Yes | Yes | No  | Not stated |
| 288 | McDonald P             | 2019 | United State | North America | Cross sectional | 23    | Yes | Yes | Yes | Yes | No  | Not stated |
| 289 | Dubé                   | 2019 | Canada       | North America | Cross sectional | 2645  | Yes | Yes | Yes | Yes | No  | Not stated |
| 290 | Guay M                 | 2019 | Canada       | North America | Cross sectional | 8737  | Yes | Yes | Yes | Yes | No  | Not stated |
| 291 | Carrion ML             | 2018 | United State | North America | Cross sectional | 50    | Yes | Yes | Yes | Yes | No  | Not stated |
| 292 | Carrion ML             | 2018 | United State | North America | Cross sectional | 50    | No  | Yes | Yes | Yes | No  | Not stated |
| 293 | Delamater PL           | 2018 | United State | North America | Cohort study    | 4177  | Yes | Yes | Yes | Yes | No  | Not stated |
| 294 | Estep KA               | 2018 | United State | North America | Cross sectional | 77244 | Yes | Yes | Yes | Yes | No  | Not stated |
| 295 | Reich J A              | 2018 | United State | North America | Cross sectional | 28    | Yes | Yes | Yes | Yes | No  | Not stated |
| 296 | Amin AB                | 2017 | United State | North America | Cross sectional | 1417  | Yes | Yes | Yes | Yes | No  | Not stated |
| 297 | Chung Y                | 2017 | United State | North America | Cross sectional | 2603  | Yes | Yes | Yes | Yes | No  | Not stated |
| 298 | Henrikson NB           | 2017 | United State | North America | Cohort study    | 391   | Yes | Yes | Yes | Yes | No  | Not stated |
| 299 | Kettunen C.            | 2017 | United State | North America | Cross sectional | 84    | Yes | Yes | Yes | Yes | No  | Not stated |
| 300 | Dubé E                 | 2017 | Canada       | North America | Cross sectional | 2013  | Yes | Yes | Yes | Yes | No  | Not stated |
| 301 | Greyson D              | 2017 | Canada       | North America | Cohort study    | 23    | Yes | Yes | Yes | Yes | No  | Not stated |
| 302 | Blaisdell LL           | 2016 | United State | North America | Cross sectional | 42    | Yes | Yes | Yes | Yes | No  | Not stated |
| 303 | Lee C                  | 2016 | United State | North America | Cross sectional | 1253  | Yes | Yes | Yes | Yes | No  | Not stated |
| 304 | Wang E                 | 2015 | United State | North America | Cross sectional | 23    | Yes | Yes | Yes | Yes | No  | Not stated |
| 305 | Dubé E                 | 2015 | Canada       | North America | Cross sectional | 54    | Yes | Yes | Yes | Yes | No  | Not stated |
| 306 | MacDonald SE           | 2014 | Canada       | North America | Cross sectional | 247   | Yes | Yes | Yes | Yes | No  | Not stated |
| 307 | Glanz JM               | 2013 | United State | North America | Cross sectional | 443   | Yes | Yes | Yes | Yes | No  | Not stated |
| 308 | Mergler M.J            | 2013 | United State | North America | Cross sectional | 1367  | Yes | Yes | Yes | Yes | No  | Not stated |
| 309 | Gaudino JA             | 2012 | United State | North America | Cohort study    | 1567  | Yes | Yes | Yes | Yes | No  | Not stated |
| 310 | Luthy KE               | 2012 | United State | North America | Cross sectional | 287   | Yes | Yes | Yes | Yes | No  | Not stated |
| 311 | Smith PJ               | 2011 | United State | North America | Cross sectional | 11206 | Yes | Yes | Yes | Yes | No  | Not stated |
| 312 | Luthy KE               | 2010 | United State | North America | Cross sectional | 86    | Yes | Yes | Yes | Yes | No  | Not stated |
| 313 | Gullion JS             | 2008 | United State | North America | Cross sectional | 25    | Yes | Yes | Yes | Yes | No  | Not stated |
| 314 | Gust D. A              | 2008 | United State | North America | Cross sectional | 3924  | Yes | Yes | Yes | Yes | No  | Not stated |
| 315 | Fredrickson DD         | 2004 | United State | North America | Cross sectional | 544   | Yes | Yes | Yes | Yes | No  | Not stated |
| 316 | Kulig JC               | 2002 | Canada       | North America | Cross sectional | 47    | Yes | Yes | Yes | Yes | No  | Not stated |

|     |                            |      |              |               |                 |        |     |     |     |     |     |          |
|-----|----------------------------|------|--------------|---------------|-----------------|--------|-----|-----|-----|-----|-----|----------|
| 317 | Goin-Kochel RP             | 2020 | United State | North America | Cross sectional | 225    | Yes | Yes | Yes | Yes | No  | Others   |
| 318 | Sahni LC                   | 2020 | United State | North America | Cross sectional | 338    | Yes | Yes | Yes | Yes | No  | Others   |
| 319 | Gromis A & Liu K.Y         | 2020 | United State | North America | Cross sectional | 4763   | No  | No  | No  | No  | Yes | Others   |
| 320 | Dubé E                     | 2016 | Canada       | North America | Cohort study    | 510    | Yes | Yes | Yes | Yes | No  | Others   |
| 321 | Bardenheier B              | 2003 | United State | North America | Cross sectional | 648    | Yes | Yes | Yes | Yes | No  | Others   |
| 322 | Fair E                     | 2002 | United State | North America | Cohort study    | 15     | Yes | Yes | Yes | Yes | No  | Others   |
| 323 | Zhou T                     | 2023 | China        | Asia          | Cross sectional | 2630   | No  | Yes | Yes | Yes | Yes | Covid 19 |
| 324 | Zhang H.                   | 2023 | China        | Asia          | Cross sectional | 346    | No  | Yes | No  | Yes | Yes | Covid 19 |
| 325 | Zhang K                    | 2023 | China        | Asia          | Cross sectional | 437    | No  | Yes | Yes | Yes | No  | Covid-19 |
| 326 | Bourguiba, A               | 2023 | UAE          | Asia          | Cross sectional | 437    | No  | Yes | Yes | Yes | Yes | Covid-19 |
| 327 | Alhuzaimi, AN              | 2023 | Saudi Arabia | Asia          | Cross sectional | 873    | No  | No  | Yes | Yes | Yes | Covid-19 |
| 328 | Almuqbil, M.               | 2023 | Saudi Arabia | Asia          | Cross sectional | 699    | Yes | No  | Yes | Yes | Yes | Covid-19 |
| 329 | Ashour, HA                 | 2023 | Saudi Arabia | Asia          | Cross sectional | 293    | No  | Yes | Yes | Yes | Yes | Covid-19 |
| 330 | Chawanpaiboon S.           | 2023 | Thailand     | Asia          | Cross sectional | 400    | No  | Yes | Yes | Yes | Yes | Covid-19 |
| 331 | Dao, T.L. et al.,          | 2023 | Vietnam      | Asia          | Cross sectional | 602    | No  | No  | Yes | Yes | No  | Covid-19 |
| 332 | Deng, JS et al             | 2023 | Taiwan       | Asia          | Cross sectional | 384    | No  | Yes | No  | Yes | Yes | Covid-19 |
| 333 | Ghazy, RM et al            | 2023 | Egypt        | Asia          | Cross sectional | 321    | No  | No  | Yes | Yes | Yes | Covid-19 |
| 334 | Maneesriwongul W. et al.,  | 2023 | Thailand     | Asia          | Cross sectional | 455    | No  | Yes | Yes | Yes | Yes | Covid-19 |
| 335 | Khatawri, EM and Sayed, AA | 2023 | Saudi Arabia | Asia          | Cross sectional | 344    | No  | No  | Yes | Yes | Yes | Covid-19 |
| 336 | Khodoruth, MAS et al       | 2023 | Qatar        | Asia          | Cross sectional | 488    | No  | Yes | No  | Yes | Yes | Covid-19 |
| 337 | Zheng, Z                   | 2023 | China        | Asia          | Cross sectional | 707    | No  | Yes | Yes | Yes | Yes | Covid-19 |
| 338 | Tang, S.                   | 2023 | China        | Asia          | Cross sectional | 2054   | No  | Yes | Yes | Yes | No  | Covid-19 |
| 339 | Zhou , Y                   | 2023 | China        | Asia          | Cross sectional | 792    | No  | Yes | No  | Yes | Yes | Covid-19 |
| 340 | Zhou Y                     | 2022 | China        | Asia          | Cross sectional | 3541   | No  | Yes | No  | Yes | Yes | Covid-19 |
| 341 | Tavakoli, N                | 2022 | Iran         | Asia          | Cohort study    | 11042  | No  | Yes | Yes | Yes | No  | Covid 19 |
| 342 | Zhou, M                    | 2022 | China        | Asia          | Cross sectional | 1602   | No  | Yes | Yes | Yes | No  | Covid-19 |
| 343 | Abdalla, SM                | 2022 | Saudi Arabia | Asia          | Cross sectional | 420    | No  | Yes | Yes | Yes | No  | Covid 19 |
| 344 | Alhazza, SF                | 2022 | Saudi Arabia | Asia          | Cross sectional | 1052   | No  | No  | No  | No  | Yes | Covid-19 |
| 345 | Ali M.                     | 2022 | Bangladesh   | Asia          | Cross sectional | 396    | No  | Yes | Yes | Yes | No  | Covid-19 |
| 346 | Ali, M                     | 2022 | Bangladesh   | Asia          | Cross sectional | 2633   | Yes | Yes | Yes | Yes | No  | Covid-19 |
| 347 | Ali-Saleh, O               | 2022 | Israel       | Asia          | Cross sectional | 2483   | No  | Yes | Yes | Yes | No  | Covid-19 |
| 348 | Almalki OS                 | 2022 | Saudi Arabia | Asia          | Cross sectional | 4135   | No  | Yes | Yes | Yes | No  | Covid-19 |
| 349 | Chia MY                    | 2022 | Singapore    | Asia          | Cross sectional | 1481   | No  | Yes | No  | No  | Yes | Covid-19 |
| 350 | Choi, U. I.                | 2022 | China        | Asia          | Cross sectional | 1217   | Yes | Yes | Yes | Yes | Yes | Covid-19 |
| 351 | Duong, A.H                 | 2022 | Vietnam      | Asia          | Cross sectional | 5357   | No  | No  | Yes | Yes | Yes | Covid-19 |
| 352 | Gunes, O                   | 2022 | Turkey       | Asia          | Cross sectional | 369    | No  | No  | Yes | Yes | No  | Covid-19 |
| 353 | Hou, Z.                    | 2022 | China        | Asia          | Cross sectional | 3897   | No  | Yes | Yes | Yes | Yes | Covid-19 |
| 354 | Huang, L.L                 | 2022 | China        | Asia          | Cross sectional | 514    | No  | Yes | Yes | Yes | Yes | Covid-19 |
| 355 | Khan, YH                   | 2022 | Saudi Arabia | Asia          | Cross sectional | 444    | Yes | Yes | Yes | Yes | Yes | Covid-19 |
| 356 | Kitro, A                   | 2022 | Thailand     | Asia          | Cross sectional | 1064   | No  | Yes | Yes | Yes | No  | Covid-19 |
| 357 | Lee, M.                    | 2022 | South Korea  | Asia          | Cross sectional | 113450 | No  | No  | Yes | Yes | No  | Covid-19 |
| 358 | Li, JB                     | 2022 | China        | Asia          | Cross sectional | 11141  | No  | Yes | Yes | Yes | No  | Covid-19 |
| 359 | Low, JM                    | 2022 | Singapore    | Asia          | Cross sectional | 628    | No  | Yes | Yes | Yes | No  | Covid-19 |
| 360 | Lu, L                      | 2022 | China        | Asia          | Cross sectional | 868    | No  | Yes | Yes | Yes | No  | Covid-19 |
| 361 | Ma, L.                     | 2022 | China        | Asia          | Cross sectional | 9424   | No  | Yes | Yes | Yes | Yes | Covid-19 |
| 362 | Ma, Y                      | 2022 | China        | Asia          | Cross sectional | 424    | No  | Yes | Yes | Yes | Yes | Covid-19 |



|     |                 |      |                                                                                                         |      |                 |       |     |     |     |     |     |          |
|-----|-----------------|------|---------------------------------------------------------------------------------------------------------|------|-----------------|-------|-----|-----|-----|-----|-----|----------|
| 363 | Mohan, R.       | 2022 | India                                                                                                   | Asia | Cross sectional | 204   | No  | Yes | Yes | Yes | Yes | Covid-19 |
| 364 | Ng, DL          | 2022 | Malaysia                                                                                                | Asia | Cross sectional | 3528  | Yes | Yes | Yes | Yes | Yes | Covid-19 |
| 365 | Parinyarux, P.  | 2022 | Thailand                                                                                                | Asia | Cross sectional | 488   | No  | Yes | Yes | Yes | No  | Covid-19 |
| 366 | Qin C           | 2022 | China                                                                                                   | Asia | Cross sectional | 1724  | No  | Yes | No  | Yes | No  | Covid-19 |
| 367 | Rehman, T       | 2022 | India                                                                                                   | Asia | Cross sectional | 1565  | No  | Yes | No  | No  | Yes | Covid-19 |
| 368 | Samudyatha, UC  | 2022 | India                                                                                                   | Asia | Cross sectional | 272   | No  | Yes | Yes | Yes | No  | Covid-19 |
| 369 | Shahani, R      | 2022 | Pakistan                                                                                                | Asia | Cross sectional | 454   | No  | Yes | Yes | Yes | Yes | Covid-19 |
| 370 | Shwethashree, M | 2022 | India                                                                                                   | Asia | Cross sectional | 246   | No  | Yes | Yes | Yes | Yes | Covid-19 |
| 371 | Tung, T. H.     | 2022 | China                                                                                                   | Asia | Cross sectional | 1788  | No  | Yes | Yes | Yes | Yes | Covid-19 |
| 372 | Wang, K         | 2022 | China                                                                                                   | Asia | Cross sectional | 1299  | No  | Yes | Yes | Yes | No  | Covid-19 |
| 373 | Wang, L         | 2022 | China                                                                                                   | Asia | Cross sectional | 2019  | No  | Yes | Yes | Yes | No  | Covid-19 |
| 374 | Wang, LJ        | 2022 | Taiwan                                                                                                  | Asia | Cross sectional | 443   | No  | Yes | Yes | Yes | No  | Covid-19 |
| 375 | Wang, Q         | 2022 | China                                                                                                   | Asia | Cross sectional | 5102  | No  | Yes | Yes | Yes | No  | Covid-19 |
| 376 | Wong, LP        | 2022 | Malaysia                                                                                                | Asia | Cross sectional | 1003  | No  | Yes | Yes | Yes | Yes | Covid-19 |
| 377 | Wong, WH        | 2022 | China                                                                                                   | Asia | Cross sectional | 545   | No  | Yes | Yes | Yes | No  | Covid-19 |
| 378 | Yang, J         | 2022 | China                                                                                                   | Asia | Cross sectional | 12872 | No  | No  | No  | Yes | No  | Covid-19 |
| 379 | Zheng, M        | 2022 | China                                                                                                   | Asia | Cross sectional | 2624  | No  | Yes | Yes | Yes | Yes | Covid-19 |
| 380 | Zhou, X         | 2022 | China                                                                                                   | Asia | Cross sectional | 2057  | No  | Yes | Yes | Yes | Yes | Covid-19 |
| 381 | Khatatbeh, M    | 2022 | Iraq, Jordan, Kuwait, Lebanon, Palestine, Qatar, Saudi Arabia (KSA), and the United Arab Emirates (UAE) | Asia | Cross sectional | 3744  | No  | Yes | Yes | Yes | No  | Covid-19 |
| 382 | Huang, L.L      | 2022 | China                                                                                                   | Asia | Cross sectional | 514   | No  | Yes | Yes | Yes | Yes | Covid-19 |
| 383 | Abuhammad, S    | 2022 | Jordan                                                                                                  | Asia | Cross sectional | 1078  | No  | Yes | Yes | Yes | Yes | Covid-19 |
| 384 | Aedh, AI        | 2022 | Saudi Arabia                                                                                            | Asia | Cross sectional | 464   | No  | Yes | Yes | Yes | Yes | Covid-19 |
| 385 | AlKetbi, LMB    | 2022 | United Arab Emirates                                                                                    | Asia | Cross sectional | 2510  | No  | Yes | Yes | Yes | No  | Covid-19 |
| 386 | Al-khlaiwi, T   | 2022 | Saudi Arabia                                                                                            | Asia | Cross sectional | 1304  | No  | Yes | Yes | Yes | Yes | Covid-19 |
| 387 | Almansour, A    | 2022 | Saudi Arabia                                                                                            | Asia | Cross sectional | 500   | No  | Yes | Yes | Yes | Yes | Covid-19 |
| 388 | Al-Qerem, W     | 2022 | Jordan                                                                                                  | Asia | Cross sectional | 819   | No  | Yes | Yes | Yes | Yes | Covid-19 |
| 389 | Alsulaiman, JW  | 2022 | Jordan                                                                                                  | Asia | Cross sectional | 564   | No  | Yes | Yes | Yes | Yes | Covid-19 |
| 390 | Bord, S         | 2022 | Israel                                                                                                  | Asia | Cross sectional | 581   | No  | Yes | Yes | Yes | No  | Covid-19 |
| 391 | Elkhadry, S.W.  | 2022 | Egypt                                                                                                   | Asia | Cross sectional | 173   | No  | Yes | Yes | Yes | Yes | Covid-19 |
| 392 | ElSayed, D.A    | 2022 | Egypt                                                                                                   | Asia | Cross sectional | 223   | No  | Yes | Yes | Yes | No  | Covid-19 |
| 393 | Ennaceur, S.    | 2022 | Saudi Arabia                                                                                            | Asia | Cross sectional | 379   | No  | Yes | Yes | Yes | Yes | Covid-19 |
| 394 | Kharaba, Z      | 2022 | United Arab Emirates                                                                                    | Asia | Cross sectional | 1049  | No  | Yes | Yes | Yes | No  | Covid-19 |
| 395 | Mohammed, AH    | 2022 | Iraq, Jordan, United Arab Emirates, Oman, and Yemen.                                                    | Asia | Cross sectional | 1154  | No  | Yes | Yes | Yes | No  | Covid-19 |

|     |                      |      |              |      |                 |       |     |     |     |     |     |          |
|-----|----------------------|------|--------------|------|-----------------|-------|-----|-----|-----|-----|-----|----------|
| 396 | Morozov, N. G.       | 2022 | Qatar        | Asia | Cross sectional | 1514  | No  | No  | Yes | Yes | Yes | Covid-19 |
| 397 | Reagu, S.            | 2022 | Israel       | Asia | Cross sectional | 6882  | No  | Yes | Yes | Yes | Yes | Covid-19 |
| 398 | Savitsky, B.         | 2022 | Israel       | Asia | Cross sectional | 138   | No  | Yes | Yes | Yes | Yes | Covid-19 |
| 399 | Shati, A.A.          | 2022 | Saudi Arabia | Asia | Cross sectional | 1463  | No  | Yes | Yes | Yes | No  | Covid-19 |
| 400 | Swed, S              | 2022 | Syria        | Asia | Cross sectional | 283   | No  | Yes | Yes | Yes | No  | Covid-19 |
| 401 | Akgün O              | 2022 | Turkey       | Asia | Cross sectional | 201   | No  | Yes | Yes | Yes | Yes | Covid-19 |
| 402 | AL-Iede M            | 2022 | Jordan       | Asia | Cross sectional | 2628  | No  | Yes | Yes | Yes | Yes | Covid-19 |
| 403 | Al-Rasheedi AT       | 2022 | Saudi Arabia | Asia | Cross sectional | 597   | No  | No  | No  | No  | Yes | Covid-19 |
| 404 | Bas K                | 2022 | Turkey       | Asia | Cross sectional | 950   | No  | No  | No  | Yes | Yes | Covid-19 |
| 405 | Çağ Y                | 2022 | Jordan       | Asia | Cross sectional | 1018  | No  | No  | Yes | Yes | Yes | Covid-19 |
| 406 | Lau, EY              | 2022 | Hong Kong    | Asia | Cross sectional | 11141 | No  | Yes | Yes | Yes | No  | Covid-19 |
| 407 | Li, T                | 2022 | China        | Asia | Cross sectional | 3342  | No  | Yes | Yes | Yes | No  | Covid-19 |
| 408 | Al-Qerem, W          | 2022 | Iraq         | Asia | Cross sectional | 491   | No  | No  | Yes | Yes | Yes | Covid-19 |
| 409 | Kocamaz, EB          | 2022 | Turkey       | Asia | Cross sectional | 384   | No  | Yes | Yes | Yes | No  | Covid-19 |
| 410 | Tsai, C-S. et al     | 2022 | Taiwan       | Asia | Cross sectional | 252   | No  | Yes | No  | Yes | No  | Covid-19 |
| 411 | Cho, HK. et at       | 2022 | Taiwan       | Asia | Cross sectional | 1019  | No  | Yes | No  | No  | Yes | Covid-19 |
| 412 | Li K. & Zhou F.      | 2022 | China        | Asia | Cross sectional | 687   | No  | No  | Yes | Yes | Yes | Covid-19 |
| 413 | Aljamaan, F. et al., | 2022 | Saudi Arabia | Asia | Cross sectional | 1340  | No  | Yes | Yes | Yes | Yes | Covid-19 |
| 414 | Zhang MX             | 2021 | China        | Asia | Cohort study    | 1788  | Yes | Yes | Yes | Yes | No  | Covid-19 |
| 415 | Çelik, M.Y.          | 2021 | Turkey       | Asia | Cross sectional | 274   | No  | No  | Yes | Yes | Yes | Covid 19 |
| 416 | Almusbah, Z          | 2021 | Saudi Arabia | Asia | Cross sectional | 1000  | No  | Yes | Yes | Yes | No  | Covid-19 |
| 417 | Altulahi, BA         | 2021 | Saudi Arabia | Asia | Cross sectional | 333   | No  | Yes | Yes | Yes | Yes | Covid-19 |
| 418 | Atad, E              | 2021 | Israel       | Asia | Cross sectional | 456   | No  | Yes | Yes | Yes | No  | Covid-19 |
| 419 | Padhi, BK            | 2021 | India        | Asia | Cross sectional | 770   | No  | Yes | Yes | Yes | No  | Covid-19 |
| 420 | Choi SH              | 2021 | South Korea  | Asia | Cross sectional | 226   | No  | Yes | Yes | Yes | No  | Covid-19 |
| 421 | Wan, X.              | 2021 | China        | Asia | Cross sectional | 468   | No  | Yes | Yes | Yes | No  | Covid-19 |
| 422 | Xu, Y                | 2021 | China        | Asia | Cross sectional | 4748  | No  | Yes | Yes | Yes | Yes | Covid-19 |
| 423 | Yigit, M             | 2021 | Turkey       | Asia | Cross sectional | 428   | Yes | Yes | Yes | Yes | No  | Covid-19 |
| 424 | Yilmaz, M.           | 2021 | Turkey       | Asia | Cross sectional | 1035  | No  | Yes | Yes | Yes | Yes | Covid-19 |
| 425 | Zhou, Y              | 2021 | China        | Asia | Cross sectional | 1071  | No  | Yes | Yes | Yes | No  | Covid-19 |
| 426 | Musa, S.             | 2021 | Qatar        | Asia | Cross sectional | 4023  | No  | Yes | Yes | Yes | No  | Covid-19 |
| 427 | Aldakhil, H.         | 2021 | Saudi Arabia | Asia | Cross sectional | 270   | No  | No  | Yes | Yes | Yes | Covid-19 |
| 428 | Samannodi, M.        | 2021 | Saudi Arabia | Asia | Cross sectional | 581   | No  | Yes | Yes | Yes | Yes | Covid-19 |
| 429 | Shmueli, L.          | 2021 | Israel       | Asia | Cross sectional | 1012  | No  | No  | Yes | Yes | No  | Covid-19 |
| 430 | Gendler Y            | 2021 | Israel       | Asia | Cross sectional | 520   | No  | No  | Yes | No  | No  | Covid-19 |
| 431 | Wang, Z.             | 2021 | China        | Asia | Cross sectional | 1332  | No  | Yes | No  | Yes | Yes | Covid-19 |
| 432 | Altulahi, N.         | 2021 | Saudi Arabia | Asia | Cross sectional | 3038  | No  | No  | No  | Yes | No  | Covid-19 |
| 433 | Feng, H              | 2021 | China        | Asia | Cross sectional | 3703  | No  | No  | No  | Yes | Yes | Covid-19 |
| 434 | Wang, X.             | 2021 | China        | Asia | Cross sectional | 941   | No  | Yes | No  | No  | Yes | Covid-19 |
| 435 | Yoda, T. et al.,     | 2021 | Japan        | Asia | Cross sectional | 1100  | No  | No  | Yes | Yes | Yes | Covid-19 |
| 436 | Horiuchi, S. et al., | 2021 | Japan        | Asia | Cross sectional | 1200  | No  | No  | Yes | Yes | Yes | Covid-19 |
| 437 | Lin Y et al          | 2021 | China        | Asia | Cross sectional | 2026  | No  | No  | Yes | Yes | Yes | Covid-19 |
| 438 | Lu X                 | 2021 | China        | Asia | Cross sectional | 13451 | No  | No  | Yes | Yes | Yes | Covid-19 |
| 439 | Al-Qahtani, AM       | 2020 | Saudi Arabia | Asia | Cross sectional | 528   | Yes | Yes | Yes | Yes | Yes | Covid-19 |
| 440 | Zhang, KC            | 2020 | China        | Asia | Cross sectional | 1052  | No  | Yes | Yes | Yes | No  | Covid-19 |
| 441 | Xie, H.              | 2023 | China        | Asia | Cross sectional | 1431  | No  | Yes | Yes | No  | Yes | HPV      |

|     |                        |      |              |      |                 |      |     |     |     |     |     |           |
|-----|------------------------|------|--------------|------|-----------------|------|-----|-----|-----|-----|-----|-----------|
| 442 | Babi A.                | 2023 | Kazakhstan   | Asia | Cross sectional | 141  | No  | Yes | Yes | Yes | No  | HPV       |
| 443 | Choi, J.               | 2023 | Korea        | Asia | Cross sectional | 10   | No  | Yes | Yes | Yes | Yes | HPV       |
| 444 | Frianto, D.            | 2022 | Indonesia    | Asia | Cross sectional | 286  | Yes | Yes | Yes | Yes | Yes | HPV       |
| 445 | Pearl, CA              | 2022 | India        | Asia | Cross sectional | 45   | No  | Yes | Yes | Yes | No  | HPV       |
| 446 | Tubas F                | 2022 | Turkey       | Asia | Cross sectional | 200  | No  | Yes | Yes | Yes | Yes | HPV       |
| 447 | Zhang, Z               | 2022 | China        | Asia | Cross sectional | 5215 | No  | Yes | No  | No  | No  | HPV       |
| 448 | Akca, G                | 2022 | Turkey       | Asia | Cross sectional | 330  | No  | Yes | Yes | Yes | No  | HPV       |
| 449 | Huang, Z               | 2022 | China        | Asia | Cross sectional | 1021 | No  | Yes | Yes | Yes | Yes | HPV       |
| 450 | Zach, R                | 2022 | Israel       | Asia | Cross sectional | 10   | Yes | Yes | Yes | Yes | No  | HPV       |
| 451 | Nguyen, LH             | 2022 | Vietnam      | Asia | Cross sectional | 785  | No  | No  | Yes | Yes | No  | HPV       |
| 452 | Imanishi Y             | 2022 | Japan        | Asia | Cross sectional | 60   | No  | Yes | Yes | No  | No  | HPV       |
| 453 | Yagi                   | 2022 | Japan        | Asia | Cross sectional | 1576 | No  | Yes | No  | No  | No  | HPV       |
| 454 | Suzuki                 | 2022 | Japan        | Asia | RCT             | 2175 | No  | Yes | Yes | Yes | No  | HPV       |
| 455 | Alkalash, SH           | 2022 | Saudi Arabia | Asia | Cross sectional | 343  | No  | Yes | Yes | Yes | Yes | HPV       |
| 456 | Choi. J                | 2021 | South Korea  | Asia | Cross sectional | 906  | No  | Yes | Yes | No  | No  | HPV       |
| 457 | Shuto                  | 2021 | Japan        | Asia | Cross sectional | 1646 | No  | No  | Yes | Yes | Yes | HPV       |
| 458 | Ugumori                | 2021 | Japan        | Asia | Cross sectional | 59   | No  | No  | Yes | No  | No  | HPV       |
| 459 | Huang Y                | 2021 | China        | Asia | Cross sectional | 1125 | Yes | Yes | Yes | Yes | No  | HPV       |
| 460 | Kobayashi              | 2021 | Japan        | Asia | Cross sectional | 242  | No  | Yes | Yes | Yes | Yes | HPV       |
| 461 | Miyoshi                | 2020 | Japan        | Asia | Cross sectional | 1648 | No  | Yes | Yes | Yes | Yes | HPV       |
| 462 | Egawa-Takata           | 2020 | Japan        | Asia | Cross sectional | 450  | No  | Yes | Yes | Yes | Yes | HPV       |
| 463 | Degarege A             | 2018 | India        | Asia | Cross sectional | 1609 | Yes | Yes | Yes | Yes | No  | HPV       |
| 464 | Yuen WW                | 2018 | China        | Asia | Cross-sectional | 1160 | Yes | Yes | Yes | Yes | No  | HPV       |
| 465 | Yagi A                 | 2018 | Japan        | Asia | Cross sectional | 4260 | No  | Yes | Yes | No  | No  | HPV       |
| 466 | Shida                  | 2015 | Japan        | Asia | Cross sectional | 125  | No  | Yes | Yes | Yes | No  | HPV       |
| 467 | Egawa-Takata           | 2015 | Japan        | Asia | Cross sectional | 2828 | No  | Yes | No  | No  | Yes | HPV       |
| 468 | Hanley                 | 2014 | Japan        | Asia | Cross sectional | 27   | No  | Yes | Yes | No  | Yes | HPV       |
| 469 | Hanley S               | 2012 | Japan        | Asia | Cross sectional | 862  | No  | No  | No  | Yes | Yes | HPV       |
| 470 | Al-Qerem, W            | 2023 | Jordon       | Asia | Cross sectional | 667  | No  | Yes | Yes | Yes | Yes | Influenza |
| 471 | Alharbi, I.            | 2023 | Saudi Arabia | Asia | Cross sectional | 334  | No  | Yes | Yes | Yes | Yes | Influenza |
| 472 | Fan, J.                | 2022 | China        | Asia | Cross sectional | 5016 | No  | Yes | Yes | Yes | Yes | Influenza |
| 473 | Lai, X                 | 2022 | China        | Asia | Cross sectional | 6668 | No  | Yes | Yes | Yes | Yes | Influenza |
| 474 | Liao, Q                | 2022 | China        | Asia | Cross sectional | 291  | No  | Yes | Yes | Yes | No  | Influenza |
| 475 | Zhang, H               | 2022 | China        | Asia | Cross sectional | 7323 | No  | Yes | Yes | Yes | Yes | Influenza |
| 476 | Abed Elhadi Shahbari N | 2022 | Israel       | Asia | Cross sectional | 693  | Yes | No  | Yes | Yes | No  | Influenza |
| 477 | Alenazi, K. A          | 2022 | Saudi Arabia | Asia | Cross sectional | 539  | No  | Yes | Yes | Yes | No  | Influenza |
| 478 | AlOmrn, HA             | 2022 | Saudi Arabia | Asia | Cross sectional | 510  | No  | Yes | Yes | Yes | Yes | Influenza |
| 479 | Hussein, YH            | 2022 | Egypt        | Asia | Cross sectional | 287  | No  | Yes | Yes | Yes | No  | Influenza |
| 480 | Jiang, M               | 2022 | China        | Asia | Cross sectional | 1206 | No  | Yes | Yes | Yes | No  | Influenza |
| 481 | Tsang, TK              | 2022 | China        | Asia | RCT             | 829  | No  | No  | No  | No  | No  | Influenza |
| 482 | Zakhour R              | 2021 | Lubnan       | Asia | Cross sectional | 306  | Yes | Yes | Yes | Yes | Yes | Influenza |
| 483 | Salawati, E.           | 2021 | Saudi Arabia | Asia | Cross sectional | 2501 | No  | Yes | Yes | Yes | No  | Influenza |
| 484 | Alolayan A             | 2019 | Saudi Arabia | Asia | Cross sectional | 399  | Yes | Yes | Yes | Yes | No  | Influenza |
| 485 | Alabbad AA             | 2018 | Saudi Arabia | Asia | Cross sectional | 100  | Yes | Yes | Yes | Yes | No  | Influenza |
| 486 | Buyuktiriyaki B        | 2014 | Turkey       | Asia | Cross sectional | 625  | Yes | Yes | Yes | Yes | No  | Influenza |
| 487 | Akis S                 | 2011 | Turkey       | Asia | Cross sectional | 611  | Yes | Yes | Yes | Yes | No  | Influenza |

|     |                         |      |              |      |                 |        |     |     |     |     |     |            |
|-----|-------------------------|------|--------------|------|-----------------|--------|-----|-----|-----|-----|-----|------------|
| 488 | Ahmed, N                | 2023 | Bangladesh   | Asia | Cross sectional | 244    | No  | Yes | Yes | No  | No  | Mix        |
| 489 | Sahoo S. S.             | 2023 | India        | Asia | Cross sectional | 196    | No  | No  | Yes | Yes | Yes | Mix        |
| 490 | Mishra, K.              | 2023 | India        | Asia | Cross sectional | 106    | No  | No  | Yes | Yes | Yes | Mix        |
| 491 | Du, M.                  | 2022 | China        | Asia | Cross sectional | 3011   | No  | Yes | Yes | Yes | No  | Mix        |
| 492 | Han, K.                 | 2022 | China        | Asia | Cross sectional | 2081   | No  | No  | Yes | Yes | Yes | Mix        |
| 493 | Ji, M                   | 2022 | China        | Asia | Cohort study    | 972    | No  | No  | No  | No  | Yes | Mix        |
| 494 | Khaliq, A               | 2022 | Pakistan     | Asia | Cross sectional | 230    | No  | Yes | Yes | Yes | Yes | Mix        |
| 495 | Shaipuzaman, N. A       | 2022 | Malaysia     | Asia | Cross sectional | 97     | No  | No  | Yes | Yes | No  | Mix        |
| 496 | Sinuraya, R. K.         | 2022 | Indonesia    | Asia | Cross sectional | 276    | No  | Yes | Yes | Yes | No  | Mix        |
| 497 | Summan, A.              | 2022 | India        | Asia | Cross sectional | 59144  | No  | No  | Yes | Yes | No  | Mix        |
| 498 | Tianshuo Z              | 2022 | China        | Asia | Cross-sectional | 199    | No  | Yes | No  | Yes | No  | Mix        |
| 499 | Wachinger, J            | 2022 | Philippine   | Asia | Cross sectional | 45     | No  | Yes | Yes | Yes | Yes | Mix        |
| 500 | Wang, Q                 | 2022 | China        | Asia | Cross sectional | 802    | No  | No  | Yes | Yes | No  | Mix        |
| 501 | Wu, L                   | 2022 | China        | Asia | Cross sectional | 1691   | No  | Yes | Yes | Yes | Yes | Mix        |
| 502 | Yalcin, SS              | 2022 | Turkey       | Asia | Cross sectional | 23756  | No  | Yes | Yes | Yes | No  | Mix        |
| 503 | Akbulut, S              | 2022 | Turkey       | Asia | Cross sectional | 460    | No  | Yes | Yes | Yes | No  | Mix        |
| 504 | Alghamdi, S             | 2022 | Saudi Arabia | Asia | Cross sectional | 123    | No  | No  | Yes | Yes | Yes | Mix        |
| 505 | Al-Regaiey, KA          | 2022 | Saudi Arabia | Asia | Cross sectional | 325    | No  | Yes | Yes | Yes | Yes | Mix        |
| 506 | Hijazi, R               | 2022 | Israel       | Asia | Cross sectional | 18     | No  | Yes | Yes | Yes | No  | Mix        |
| 507 | Ozer, M                 | 2022 | Turkey       | Asia | Cross sectional | 78     | No  | Yes | Yes | Yes | No  | Mix        |
| 508 | Topaktas B.             | 2022 | Turkey       | Asia | Cross sectional | 338    | No  | Yes | No  | Yes | No  | Mix        |
| 509 | Al Yamani, Z.J. et al., | 2022 | Saudi Arabia | Asia | Cross sectional | 375    | Yes | No  | Yes | No  | No  | Mix        |
| 510 | Zin ZM et al            | 2022 | Malaysia     | Asia | Cross sectional | 27     | Yes | No  | No  | Yes | Yes | Mix        |
| 511 | Temsah, MH              | 2021 | Saudi Arabia | Asia | Cross sectional | 3167   | No  | Yes | Yes | Yes | No  | Mix        |
| 512 | Wang, Q                 | 2021 | China        | Asia | Cross sectional | 5102   | No  | Yes | Yes | Yes | No  | Mix        |
| 513 | Yilmazbaz, P            | 2021 | Turkey       | Asia | Cross sectional | 440    | No  | Yes | Yes | Yes | No  | Mix        |
| 514 | Tal, O                  | 2021 | Israel       | Asia | Cross sectional | 1010   | No  | Yes | No  | No  | Yes | Mix        |
| 515 | Al-Nafeesah AS          | 2021 | Saudi Arabia | Asia | Cross sectional | 1143   | No  | Yes | Yes | Yes | Yes | Mix        |
| 516 | Baghdadi, LR            | 2021 | Saudi Arabia | Asia | Cross sectional | 577    | No  | No  | Yes | Yes | Yes | Mix        |
| 517 | Hou, Z.                 | 2021 | China        | Asia | Cross sectional | 1655   | No  | Yes | No  | Yes | No  | Mix        |
| 518 | Alsubaie SS             | 2019 | Saudi Arabia | Asia | Cross sectional | 500    | Yes | Yes | Yes | Yes | No  | Mix        |
| 519 | Chang K                 | 2019 | South Korea  | Asia | Cross sectional | 129    | Yes | Yes | Yes | Yes | No  | Mix        |
| 520 | Jalloh M.F.             | 2019 | Bangladesh   | Asia | Cross sectional | 105    | Yes | Yes | Yes | Yes | No  | Mix        |
| 521 | Amit Aharon A           | 2018 | Israel       | Asia | Cross sectional | 200    | Yes | Yes | Yes | Yes | No  | Mix        |
| 522 | Chan HK                 | 2018 | Malaysia     | Asia | Cross sectional | 117429 | Yes | Yes | Yes | Yes | No  | Mix        |
| 523 | Dasgupta P              | 2018 | India        | Asia | Cross sectional | 194    | Yes | Yes | Yes | Yes | No  | Mix        |
| 524 | Khaliq A.               | 2017 | Pakistan     | Asia | Cross sectional | 484    | Yes | Yes | Yes | Yes | No  | Mix        |
| 525 | Abu-rish EY             | 2016 | Jordan       | Asia | Cross sectional | 568    | No  | No  | No  | No  | Yes | Mix        |
| 526 | M Muhsen K              | 2012 | Israel       | Asia | Case control    | 270    | Yes | Yes | Yes | Yes | No  | Mix        |
| 527 | Quaiyum MA              | 2011 | Bangladesh   | Asia | Cross sectional | 2700   | Yes | Yes | Yes | Yes | No  | Mix        |
| 528 | Hussein SZ              | 2022 | Malaysia     | Asia | Cross sectional | 202    | No  | Yes | Yes | Yes | No  | MMR        |
| 529 | Ashkenazi S             | 2020 | Israel       | Asia | Cross sectional | 399    | Yes | Yes | Yes | Yes | No  | MMR        |
| 530 | Abdullah AC             | 2018 | Malaysia     | Asia | Cross sectional | 760    | Yes | Yes | Yes | Yes | No  | MMR        |
| 531 | Fakhrudin TM et al      | 2023 | Malaysia     | Asia | Cross sectional | 375    | No  | Yes | Yes | Yes | No  | Not stated |
| 532 | Han Y                   | 2022 | China        | Asia | Cross sectional | 2952   | No  | Yes | Yes | No  | No  | Not stated |
| 533 | Kuan, CI                | 2022 | Taiwan       | Asia | Cross sectional | 24     | No  | No  | Yes | Yes | Yes | Not stated |

|     |                     |      |                                                         |      |                 |       |     |     |     |     |     |            |
|-----|---------------------|------|---------------------------------------------------------|------|-----------------|-------|-----|-----|-----|-----|-----|------------|
| 534 | Shen, X             | 2022 | China                                                   | Asia | Cross sectional | 1025  | No  | Yes | Yes | Yes | No  | Not stated |
| 535 | Alaamri, O.         | 2022 | Saudi Arabia                                            | Asia | Cross sectional | 2030  | No  | Yes | Yes | Yes | Yes | Not stated |
| 536 | Yörük S             | 2021 | Turkey                                                  | Asia | Cross sectional | 370   | Yes | Yes | Yes | Yes | No  | Not stated |
| 537 | Akhmetzhanova Z     | 2020 | Kazakhstan                                              | Asia | Cross sectional | 384   | Yes | Yes | Yes | Yes | No  | Not stated |
| 538 | AlGoraini YM        | 2020 | Saudi Arabia                                            | Asia | Cross sectional | 384   | Yes | Yes | Yes | Yes | No  | Not stated |
| 539 | Alsuwaidi AR        | 2020 | United Arab Emirates                                    | Asia | Cross sectional | 300   | Yes | Yes | Yes | Yes | No  | Not stated |
| 540 | Çağ Y               | 2020 | Turkey                                                  | Asia | Cross sectional | 1184  | Yes | Yes | Yes | Yes | No  | Not stated |
| 541 | Gunes NA            | 2020 | Turkey                                                  | Asia | Cross sectional | 614   | Yes | Yes | Yes | Yes | No  | Not stated |
| 542 | Kalok A.            | 2020 | Malaysia                                                | Asia | Cross sectional | 1081  | Yes | Yes | Yes | Yes | No  | Not stated |
| 543 | Noyman-Veksler G    | 2020 | Israel                                                  | Asia | Cross sectional | 555   | Yes | Yes | Yes | Yes | No  | Not stated |
| 544 | Yalçın SS           | 2020 | Turkey                                                  | Asia | Cross sectional | 14    | Yes | Yes | Yes | Yes | No  | Not stated |
| 545 | Rumetta J           | 2020 | Malaysia                                                | Asia | Cross sectional | 14    | Yes | Yes | Yes | Yes | Yes | Not stated |
| 546 | Hu Y                | 2019 | China                                                   | Asia | Cross sectional | 770   | Yes | Yes | Yes | Yes | No  | Not stated |
| 547 | Ren J               | 2018 | China                                                   | Asia | Cross sectional | 1188  | Yes | Yes | Yes | Yes | No  | Not stated |
| 548 | Sun X               | 2018 | China                                                   | Asia | Cross sectional | 34    | Yes | Yes | Yes | Yes | No  | Not stated |
| 549 | Noor T              | 2018 | Pakistan                                                | Asia | Cross sectional | 100   | Yes | Yes | Yes | Yes | No  | Not stated |
| 550 | Aharony N           | 2017 | Israel                                                  | Asia | Cross sectional | 210   | Yes | Yes | Yes | Yes | No  | Not stated |
| 551 | Azizi FS            | 2017 | Malaysia                                                | Asia | Cross sectional | 545   | Yes | Yes | Yes | Yes | No  | Not stated |
| 552 | Ni, Y-H.            | 2023 | China                                                   | Asia | Cross sectional | 1051  | No  | No  | No  | Yes | Yes | Others     |
| 553 | Yang, Y             | 2022 | China                                                   | Asia | Cross sectional | 1085  | No  | Yes | Yes | Yes | Yes | Others     |
| 554 | Al-Iede, M          | 2022 | Jordan                                                  | Asia | Cross sectional | 720   | No  | Yes | Yes | Yes | Yes | Others     |
| 555 | Du, Y et al         | 2022 | China                                                   | Asia | Cross sectional | 1110  | No  | No  | Yes | Yes | No  | Others     |
| 556 | Yang, Y             | 2022 | China                                                   | Asia | Cross sectional | 219   | No  | Yes | Yes | Yes | Yes | Other      |
| 557 | Wang, M             | 2022 | China                                                   | Asia | Cross sectional | 762   | No  | Yes | Yes | Yes | No  | Other      |
| 558 | Qi L                | 2019 | China                                                   | Asia | Cross sectional | 992   | Yes | Yes | Yes | Yes | No  | Others     |
| 559 | Gesser-Edelsburga A | 2016 | Israel                                                  | Asia | Cross sectional | 196   | Yes | Yes | Yes | Yes | No  | Others     |
| 560 | Khan TM             | 2016 | Pakistan                                                | Asia | Cross sectional | 1775  | Yes | Yes | Yes | Yes | No  | Other      |
| 561 | Khowaja AR          | 2012 | Pakistan                                                | Asia | Cross sectional | 1017  | Yes | Yes | Yes | Yes | No  | Others     |
| 562 | Ali HYM             | 2004 | Iraq                                                    | Asia | Cross sectional | 254   | Yes | Yes | Yes | Yes | No  | Others     |
| 563 | Li L                | 2022 | China                                                   | Asia | Cross sectional | 1409  | No  | Yes | No  | Yes | Yes | Others     |
| 564 | Sharif Nia et al.,  | 2023 | Australia, Iran, China, Turkey                          | Mix  | Cross sectional | 673   | No  | No  | No  | No  | Yes | Covid-19   |
| 565 | Goldman, RD         | 2022 | United State, Canada, Israel, Japan, Spain, Switzerland | Mix  | Cross sectional | 2687  | No  | No  | No  | No  | Yes | Covid-19   |
| 566 | Goldman, RD         | 2022 | USA, Canada, Israel, and Switzerland                    | Mix  | Cohort study    | 882   | No  | No  | No  | No  | Yes | Covid-19   |
| 567 | Goldman, RD         | 2022 | United State, Canada, Israel                            | Mix  | Cross sectional | 1956  | No  | No  | Yes | Yes | No  | Covid-19   |
| 568 | Sabra, HK           | 2022 | Egypt                                                   | Mix  | Cross sectional | 1032  | No  | Yes | Yes | Yes | No  | Covid-19   |
| 569 | Skjefte, M.         | 2021 | United States, India, Brazil, Russia, Spain, Argentina, | Mix  | Cross sectional | 17871 | No  | Yes | Yes | Yes | Yes | Covid-19   |

|     |                     |      |                                                                                                |         |                 |        |     |     |     |     |     |            |
|-----|---------------------|------|------------------------------------------------------------------------------------------------|---------|-----------------|--------|-----|-----|-----|-----|-----|------------|
|     |                     |      | Colombia, UK, Mexico, Peru, South Africa, Italy, Chile, Philippines, Australia and New Zealand |         |                 |        |     |     |     |     |     |            |
| 570 | Goldman, RD         | 2021 | United State, Canada, Israel                                                                   | Mix     | Cross sectional | 2769   | No  | Yes | Yes | Yes | No  | Covid-19   |
| 571 | Urrunaga-Pastor, D. | 2021 | Latin America and the Caribbean                                                                | Mix     | Cross sectional | 227740 | No  | Yes | Yes | Yes | No  | Covid-19   |
| 572 | Goldman RD          | 2020 | United State, Canada, Japan, Spain, Switzeland                                                 | Mix     | Cross sectional | 1005   | No  | Yes | Yes | Yes | Yes | Covid-19   |
| 573 | Yilmaz M            | 2023 | Turkey                                                                                         | Mix     | Cross sectional | 94     | Yes | No  | Yes | Yes | Yes | Mix        |
| 574 | Tekin C.            | 2023 | Turkey                                                                                         | Mix     | Cross sectional | 1100   | No  | No  | Yes | Yes | Yes | Mix        |
| 575 | Borras-Bermejo B    | 2022 | Afghanistan, Democratic Republic of the Congo, Mauritania, Niger, Pakistan and South Sudan.    | Mix     | Cross sectional | 2706   | No  | Yes | Yes | Yes | No  | Mix        |
| 576 | Durmaz, N.          | 2022 | Turkey                                                                                         | Mix     | Cross sectional | 1087   | No  | No  | Yes | Yes | Yes | Mix        |
| 577 | Tan L.              | 2023 | USA,UK, France, Germany, Italy, Brazil, Argentina, and Australia;                              | Mix     | Cross sectional | 4962   | No  | No  | Yes | Yes | Yes | Others     |
| 578 | Reuben R            | 2020 | United States, Canada, England                                                                 | Mix     | Cross sectional | 484    | Yes | Yes | Yes | Yes | No  | Not stated |
| 579 | Bolsewicz, KT et al | 2023 | Australia                                                                                      | Oceania | Cross sectional | 21     | No  | No  | Yes | Yes | Yes | Covid-19   |
| 580 | Wen, LM             | 2022 | Australia                                                                                      | Oceania | Cross sectional | 491    | No  | Yes | Yes | Yes | No  | Covid-19   |
| 581 | Jeffs, E            | 2021 | New Zealand                                                                                    | Oceania | Cross sectional | 1191   | No  | Yes | Yes | Yes | No  | Covid-19   |
| 582 | Evans, S            | 2021 | Australia                                                                                      | Oceania | Cross sectional | 1094   | No  | Yes | Yes | Yes | No  | Covid-19   |
| 583 | Carlsona, SJ        | 2022 | Australia                                                                                      | Oceania | Cohort study    | 87     | No  | Yes | Yes | Yes | No  | Influenza  |
| 584 | Biezen              | 2018 | Australia                                                                                      | Oceania | Cross sectional | 50     | Yes | Yes | Yes | Yes | No  | Influenza  |
| 585 | Jones K             | 1992 | Australia                                                                                      | Oceania | Cross sectional | 171    | Yes | Yes | Yes | Yes | No  | Influenza  |
| 586 | Wright, D           | 2022 | Australia                                                                                      | Oceania | Cross sectional | 1050   | No  | Yes | Yes | Yes | Yes | Mix        |
| 587 | Debela, M. S.       | 2022 | New Zealand                                                                                    | Oceania | Cross sectional | 178    | No  | Yes | Yes | Yes | No  | Mix        |
| 588 | Enkel SL            | 2018 | Australia                                                                                      | Oceania | Cross sectional | 10     | Yes | Yes | Yes | Yes | No  | Mix        |
| 589 | Forbes TA           | 2015 | Australia                                                                                      | Oceania | Cross sectional | 171    | Yes | Yes | Yes | Yes | No  | Mix        |

|     |                         |      |                |         |                 |      |     |     |     |     |     |            |
|-----|-------------------------|------|----------------|---------|-----------------|------|-----|-----|-----|-----|-----|------------|
| 590 | Armiento R              | 2020 | Australia      | Oceania | Cohort study    | 759  | Yes | Yes | Yes | Yes | No  | Not stated |
| 591 | Tuckerman J             | 2020 | Australia      | Oceania | Cross sectional | 539  | Yes | Yes | Yes | Yes | No  | Not stated |
| 592 | Bryden GM               | 2019 | Australia      | Oceania | Cross sectional | 897  | Yes | Yes | Yes | Yes | No  | Not stated |
| 593 | Helps C                 | 2019 | Australia      | Oceania | Cross sectional | 32   | Yes | Yes | Yes | Yes | No  | Not stated |
| 594 | Rossen I                | 2019 | Australia      | Oceania | Cross sectional | 296  | Yes | Yes | Yes | Yes | No  | Not stated |
| 595 | Rozbroj T               | 2019 | Australia      | Oceania | Cross sectional | 904  | Yes | Yes | Yes | Yes | No  | Not stated |
| 596 | Attwell K               | 2018 | Australia      | Oceania | Cross sectional | 32   | Yes | Yes | Yes | Yes | No  | Not stated |
| 597 | Attwell K               | 2018 | Australia      | Oceania | Cross sectional | 29   | Yes | Yes | Yes | Yes | No  | Not stated |
| 598 | Corben P                | 2018 | Australia      | Oceania | Cross sectional | 231  | Yes | Yes | Yes | Yes | No  | Not stated |
| 599 | Frawley J.E             | 2018 | Australia      | Oceania | Cross sectional | 429  | Yes | Yes | Yes | Yes | No  | Not stated |
| 600 | Attwell K               | 2017 | Australia      | Oceania | Cross sectional | 27   | Yes | Yes | Yes | Yes | No  | Not stated |
| 601 | Attwell K               | 2015 | Australia      | Oceania | Cross sectional | 304  | Yes | Yes | Yes | Yes | No  | Not stated |
| 602 | Gilmartin CE            | 2020 | Australia      | Oceania | Cross sectional | 113  | Yes | Yes | Yes | Yes | No  | Others     |
| 603 | Ates, BO                | 2023 | Turkiye        | Europe  | Cross sectional | 284  | No  | No  | Yes | Yes | No  | Covid-19   |
| 604 | Bektas, I and Bektas, M | 2023 | Turkey         | Europe  | Cross sectional | 199  | No  | No  | Yes | Yes | No  | Covid-19   |
| 605 | Celik, T and Dogan, D   | 2023 | Turkey         | Europe  | Cross sectional | 102  | No  | No  | No  | Yes | Yes | Covid-19   |
| 606 | Sasic M. et al.,        | 2023 | Croatia        | Europe  | Cross sectional | 872  | No  | No  | No  | No  | Yes | Covid-19   |
| 607 | Sahin, A. et al.,       | 2023 | Turkey         | Europe  | Cross sectional | 396  | No  | No  | Yes | Yes | Yes | Covid-19   |
| 608 | Esposito, S. et al      | 2023 | Italy          | Europe  | Cross sectional | 3433 | No  | Yes | Yes | Yes | Yes | Covid-19   |
| 609 | Ganem, F et al          | 2023 | Spain          | Europe  | Cross sectional | 3383 | No  | No  | Yes | Yes | Yes | Covid-19   |
| 610 | Smith LE                | 2022 | United Kingdom | Europe  | Cohort study    | 270  | No  | No  | No  | Yes | Yes | Covid -19  |
| 611 | Koźlerek, M.            | 2022 | Poland         | Europe  | Cross sectional | 402  | No  | No  | Yes | Yes | No  | Covid-19   |
| 612 | Bianco, A.              | 2022 | Italy          | Europe  | Cross sectional | 394  | No  | Yes | Yes | Yes | No  | Covid-19   |
| 613 | Ceannt, R               | 2022 | Ireland        | Europe  | Cohort study    | 482  | No  | No  | Yes | Yes | No  | Covid-19   |
| 614 | Di Giuseppe, G.         | 2022 | Italy          | Europe  | Cross sectional | 607  | No  | Yes | Yes | Yes | Yes | Covid-19   |
| 615 | Iannello, P.            | 2022 | Italy          | Europe  | Cross sectional | 415  | No  | Yes | Yes | Yes | Yes | Covid-19   |
| 616 | Krakowczyk, J.B.        | 2022 | German         | Europe  | Cross sectional | 2405 | No  | Yes | Yes | Yes | Yes | Covid-19   |
| 617 | Lecce, M                | 2022 | Italy          | Europe  | Cross sectional | 604  | No  | Yes | Yes | Yes | No  | Covid-19   |
| 618 | Manolescu, L.S.C.       | 2022 | Romania        | Europe  | Cross sectional | 1645 | No  | Yes | Yes | Yes | No  | Covid-19   |
| 619 | Marcau, F.C.            | 2022 | Romania        | Europe  | Cross sectional | 581  | No  | No  | Yes | Yes | Yes | Covid-19   |
| 620 | Miliordos, K            | 2022 | Greece         | Europe  | Cross sectional | 366  | No  | Yes | Yes | Yes | Yes | Covid-19   |
| 621 | Miraglia del Giudice, G | 2022 | Italy          | Europe  | Cross sectional | 430  | No  | Yes | Yes | Yes | No  | Covid-19   |
| 622 | Napoli, A.              | 2022 | Italy          | Europe  | Cross sectional | 358  | No  | Yes | Yes | Yes | No  | Covid-19   |
| 623 | Rees, F                 | 2022 | German         | Europe  | Cross sectional | 244  | No  | No  | No  | No  | No  | Covid-19   |
| 624 | Steletou, E             | 2022 | Greece         | Europe  | Cross sectional | 439  | No  | Yes | Yes | Yes | Yes | Covid-19   |
| 625 | Schmidtke, K. A         | 2022 | England        | Europe  | Cross sectional | 954  | No  | Yes | Yes | Yes | No  | Covid-19   |
| 626 | Skirrow, H.             | 2022 | England        | Europe  | Cross sectional | 1404 | No  | No  | Yes | Yes | No  | Covid-19   |
| 627 | Wagner, A               | 2022 | Switzerland.   | Europe  | Cross sectional | 1318 | No  | Yes | Yes | Yes | No  | Covid-19   |
| 628 | Savarese G.             | 2022 | Italy          | Europe  | Cross sectional | 1105 | No  | No  | Yes | Yes | Yes | Covid-19   |
| 629 | Babicki, M              | 2021 | Poland         | Europe  | Cross sectional | 4432 | No  | Yes | No  | Yes | Yes | Covid-19   |
| 630 | Brandstetter, S         | 2021 | German         | Europe  | Cross sectional | 612  | No  | Yes | Yes | Yes | No  | Covid-19   |
| 631 | Fedele                  | 2021 | Italy          | Europe  | Cross sectional | 640  | Yes | Yes | Yes | Yes | No  | Covid-19   |
| 632 | Galanis, P              | 2021 | Greece         | Europe  | Cross sectional | 656  | No  | Yes | Yes | Yes | Yes | Covid-19   |
| 633 | Galanis, P              | 2021 | Greece         | Europe  | Cross sectional | 813  | No  | Yes | Yes | Yes | No  | Covid-19   |
| 634 | Montalti, M.            | 2021 | Italy          | Europe  | Cohort study    | 4993 | No  | Yes | Yes | Yes | No  | Covid-19   |

|     |                    |      |                 |        |                 |        |     |     |     |     |     |           |
|-----|--------------------|------|-----------------|--------|-----------------|--------|-----|-----|-----|-----|-----|-----------|
| 635 | Seiler, M.         | 2021 | Switzerland     | Europe | Cross sectional | 662    | No  | No  | Yes | Yes | Yes | Covid-19  |
| 636 | Zona, S. et al.,   | 2021 | Italy           | Europe | Cross sectional | 1799   | No  | Yes | Yes | No  | No  | Covid-19  |
| 637 | Russo, L. et al.,  | 2021 | Italy           | Europe | Cross sectional | 1205   | No  | No  | No  | Yes | Yes | Covid-19  |
| 638 | Bell S             | 2020 | England         | Europe | Cross sectional | 1252   | No  | No  | No  | Yes | No  | Covid-19  |
| 639 | Smith, L.E.        | 2019 | England         | Europe | Cohort study    | 270    | No  | No  | No  | Yes | Yes | Covid-19  |
| 640 | Sobierajski, T.    | 2023 | Poland          | Europe | Cross sectional | 360    | No  | Yes | Yes | Yes | No  | HPV       |
| 641 | S`trbac M. et al., | 2023 | Serbia          | Europe | Cross sectional | 436    | No  | Yes | Yes | Yes | Yes | HPV       |
| 642 | Abuduxike G        | 2022 | Cyprus          | Europe | Cross sectional | 227    | No  | Yes | Yes | No  | Yes | HPV       |
| 643 | Calagna G          | 2022 | Italy           | Europe | Cross sectional | 300    | No  | Yes | Yes | No  | No  | HPV       |
| 644 | Lopez, N.          | 2022 | Spain           | Europe | Cross sectional | 1405   | No  | No  | Yes | Yes | No  | HPV       |
| 645 | Karafillakis, E    | 2022 | France          | Europe | Cross sectional | 57     | No  | Yes | Yes | Yes | No  | HPV       |
| 646 | Smolarczyk, K.     | 2022 | Poland          | Europe | Cross sectional | 288    | No  | Yes | Yes | Yes | Yes | HPV       |
| 647 | Taylor, J          | 2022 | England         | Europe | Cross sectional | 138    | No  | Yes | Yes | Yes | No  | HPV       |
| 648 | Venderbos, J. R.   | 2022 | Netherlands     | Europe | Cross sectional | 16     | Yes | Yes | Yes | Yes | No  | HPV       |
| 649 | Naoum, P           | 2022 | Greece          | Europe | Cross sectional | 1000   | No  | Yes | Yes | Yes | No  | HPV       |
| 650 | Lopez, N.          | 2022 | Spain           | Europe | Cross sectional | 1405   | No  | No  | Yes | Yes | No  | HPV       |
| 651 | Runngren, E.       | 2021 | Sweden          | Europe | Cross sectional | 20     | No  | Yes | Yes | Yes | Yes | HPV       |
| 652 | Della Polla G      | 2020 | Italy           | Europe | Cross sectional | 435    | Yes | Yes | Yes | Yes | No  | HPV       |
| 653 | Waller J           | 2020 | England & Wales | Europe | Cross sectional | 1056   | Yes | Yes | Yes | Yes | No  | HPV       |
| 654 | Amdisen L          | 2018 | Denmark         | Europe | Cohort study    | 161528 | Yes | Yes | Yes | Yes | No  | HPV       |
| 655 | Grandahl M         | 2017 | Sweden          | Europe | Cross sectional | 366    | Yes | Yes | Yes | Yes | No  | HPV       |
| 656 | Navarro-Illana P   | 2015 | Spain           | Europe | Cross sectional | 833    | Yes | Yes | Yes | Yes | No  | HPV       |
| 657 | Grandahl M         | 2014 | Sweden          | Europe | Cross sectional | 25     | Yes | Yes | Yes | Yes | No  | HPV       |
| 658 | Kornfeld           | 2013 | Spain           | Europe | Cross sectional | 224    | Yes | Yes | Yes | Yes | No  | HPV       |
| 659 | Craciun C          | 2012 | Romania         | Europe | Cross sectional | 25     | Yes | Yes | Yes | Yes | No  | HPV       |
| 660 | Hontelez J.A.C.    | 2010 | Netherlands     | Europe | Cross sectional | 203    | Yes | Yes | Yes | Yes | No  | HPV       |
| 661 | Kiroplis et al.,   | 2023 | Ireland         | Europe | Cross sectional | 183    | No  | Yes | Yes | Yes | Yes | Influenza |
| 662 | Price, T           | 2022 | England         | Europe | Cross sectional | 12     | No  | Yes | Yes | Yes | No  | Influenza |
| 663 | De Gioia, E.R.     | 2022 | Italy           | Europe | Cross sectional | 169    | No  | Yes | Yes | Yes | Yes | Influenza |
| 664 | Di Giuseppe, G.    | 2022 | Italy           | Europe | Cross sectional | 574    | No  | Yes | Yes | No  | No  | Influenza |
| 665 | Bielecki K         | 2020 | Scotland        | Europe | Cross sectional | 65     | Yes | Yes | Yes | Yes | No  | Influenza |
| 666 | Gorman D.R         | 2020 | Poland          | Europe | Cross sectional | 128    | Yes | Yes | Yes | Yes | No  | Influenza |
| 667 | Prospero E         | 2019 | Italy           | Europe | Cross sectional | 366    | Yes | Yes | Yes | Yes | No  | Influenza |
| 668 | Rodríguez-Blanco N | 2019 | Spain           | Europe | Cross sectional | 683    | Yes | Yes | Yes | Yes | No  | Influenza |
| 669 | Paterson P         | 2018 | England         | Europe | Cross sectional | 913    | Yes | Yes | Yes | Yes | No  | Influenza |
| 670 | Bults M            | 2011 | Netherlands     | Europe | Cross sectional | 1227   | Yes | Yes | Yes | Yes | No  | Influenza |
| 671 | Brown K.F          | 2010 | England         | Europe | Cross sectional | 142    | Yes | Yes | Yes | Yes | No  | Influenza |
| 672 | Gjini, E.          | 2023 | Albania         | Europe | Cross sectional | 475    | No  | No  | Yes | Yes | Yes | Mix       |
| 673 | Duran, S et al     | 2023 | Turkey          | Europe | Cross sectional | 610    | No  | No  | Yes | Yes | Yes | Mix       |
| 674 | Marron, L. et al   | 2023 | Ireland         | Europe | Cross sectional | 855    | No  | No  | Yes | Yes | Yes | Mix       |
| 675 | Buonsenso, D       | 2022 | Italy           | Europe | Cross sectional | 121    | No  | Yes | No  | No  | No  | Mix       |
| 676 | Deml, MJ           | 2022 | Switzerland     | Europe | Cross sectional | 30     | No  | Yes | Yes | Yes | Yes | Mix       |
| 677 | Derdemezis, C.     | 2022 | Greece          | Europe | Cross sectional | 1095   | No  | Yes | Yes | Yes | No  | Mix       |
| 678 | Ebi, SJ            | 2022 | Switzerland     | Europe | Cross sectional | 1390   | No  | Yes | Yes | Yes | Yes | Mix       |
| 679 | Fakonti, G         | 2022 | Greece          | Europe | Cross sectional | 1885   | No  | Yes | Yes | Yes | Yes | Mix       |



|     |                      |      |                |        |                 |        |     |     |     |     |     |            |
|-----|----------------------|------|----------------|--------|-----------------|--------|-----|-----|-----|-----|-----|------------|
| 680 | Herdea, V            | 2022 | Romania        | Europe | Cohort study    | 5640   | No  | Yes | Yes | Yes | No  | Mix        |
| 681 | Jafflin, K           | 2022 | Switzerland    | Europe | Cross sectional | 2425   | No  | No  | Yes | No  | No  | Mix        |
| 682 | Miron, V. D.         | 2022 | Romania        | Europe | Cross sectional | 2550   | No  | Yes | Yes | Yes | Yes | Mix        |
| 683 | Napolitano, F        | 2022 | Italy          | Europe | Cross sectional | 444    | No  | No  | Yes | Yes | Yes | Mix        |
| 684 | Nurmi, J             | 2022 | Finland        | Europe | Cross sectional | 38     | No  | Yes | Yes | Yes | Yes | Mix        |
| 685 | Skitareli c, N.      | 2022 | Croatia        | Europe | Cross sectional | 300    | No  | Yes | Yes | Yes | Yes | Mix        |
| 686 | Van Hoecke, A.L.     | 2022 | England        | Europe | Cross sectional | 538    | No  | Yes | Yes | Yes | No  | Mix        |
| 687 | Ourania Z. et al.,   | 2022 | Greece         | Europe | Cross sectional | 9      | No  | Yes | Yes | Yes | Yes | Mix        |
| 688 | Akman N & Yildiz A   | 2022 | Turkey         | Europe | Cross sectional | 203    | Yes | Yes | Yes | Yes | Yes | Mix        |
| 689 | Caso, D              | 2022 | Italy          | Europe | Cross sectional | 447    | Yes | Yes | Yes | Yes | Yes | Mix        |
| 690 | Fonseca, IC          | 2021 | Portugal       | Europe | Cross sectional | 886    | No  | Yes | Yes | Yes | Yes | Mix        |
| 691 | Stoeckel, F          | 2021 | European Union | Europe | Cross sectional | 18500  | No  | Yes | Yes | Yes | No  | Mix        |
| 692 | Whelan SO            | 2021 | Ireland        | Europe | Cross sectional | 436    | Yes | Yes | Yes | Yes | No  | Mix        |
| 693 | Ruggiero, KM         | 2021 | France         | Europe | Cross sectional | 427    | Yes | No  | Yes | Yes | No  | Mix        |
| 694 | Byström E            | 2020 | Sweden         | Europe | Cross sectional | 825    | Yes | Yes | Yes | Yes | No  | Mix        |
| 695 | Charron J            | 2020 | France         | Europe | Cross sectional | 3938   | Yes | Yes | Yes | Yes | No  | Mix        |
| 696 | Lewandowska A        | 2020 | Poland         | Europe | Cohort study    | 1257   | Yes | Yes | Yes | Yes | No  | Mix        |
| 697 | Facciola A           | 2019 | Italy          | Europe | Cross sectional | 1093   | Yes | Yes | Yes | Yes | No  | Mix        |
| 698 | Miko D               | 2019 | Romania        | Europe | Cross sectional | 452    | Yes | Yes | Yes | Yes | No  | Mix        |
| 699 | Napolitano F         | 2018 | Italy          | Europe | Cross sectional | 437    | Yes | Yes | Yes | Yes | No  | Mix        |
| 700 | Betsch C             | 2018 | German         | Europe | Cohort study    | 943    | Yes | Yes | Yes | Yes | No  | Mix        |
| 701 | Olszewska M          | 2018 | Poland         | Europe | Cross sectional | 300    | Yes | Yes | Yes | Yes | No  | Mix        |
| 702 | Tho,SL               | 2015 | France         | Europe | Cross sectional | 1270   | No  | Yes | Yes | Yes | Yes | Mix        |
| 703 | Daňová J             | 2015 | Czech Republic | Europe | Cross sectional | 480    | Yes | Yes | Yes | Yes | No  | Mix        |
| 704 | Harmsen IA           | 2013 | Netherlands    | Europe | Cross sectional | 592    | Yes | Yes | Yes | Yes | No  | Mix        |
| 705 | Harmsen IA           | 2013 | Netherlands    | Europe | Cross sectional | 60     | Yes | Yes | Yes | Yes | No  | Mix        |
| 706 | Harmsen IA           | 2012 | Netherlands    | Europe | Cross sectional | 16     | Yes | Yes | Yes | Yes | No  | Mix        |
| 707 | Borràs E             | 2009 | Spain          | Europe | Cross sectional | 630    | Yes | Yes | Yes | Yes | No  | Mix        |
| 708 | Stampi S             | 2005 | Italy          | Europe | Cross sectional | 350256 | Yes | Yes | Yes | Yes | No  | Mix        |
| 709 | Kirkedal, A-B.       | 2022 | Denmark        | Europe | Cross sectional | 24     | No  | Yes | Yes | Yes | Yes | MMR        |
| 710 | Jama A               | 2018 | Sweden         | Europe | Cross sectional | 13     | Yes | Yes | Yes | Yes | No  | MMR        |
| 711 | Anello P             | 2017 | Italy          | Europe | Cohort study    | 86255  | Yes | Yes | Yes | Yes | No  | MMR        |
| 712 | Campbell             | 2017 | England        | Europe | Cross sectional | 1792   | Yes | Yes | Yes | Yes | No  | MMR        |
| 713 | Mchale P             | 2016 | England        | Europe | Cross sectional | 142    | Yes | Yes | Yes | Yes | No  | MMR        |
| 714 | Weiss C              | 2016 | Switzerland    | Europe | Cross sectional | 101    | Yes | Yes | Yes | Yes | No  | MMR        |
| 715 | Restivo V            | 2015 | Italy          | Europe | Cross sectional | 443    | Yes | Yes | Yes | Yes | No  | MMR        |
| 716 | Byström E            | 2014 | Sweden         | Europe | Cross sectional | 20     | Yes | Yes | Yes | Yes | No  | MMR        |
| 717 | Casiday R            | 2006 | England        | Europe | Cross sectional | 996    | Yes | Yes | Yes | Yes | No  | MMR        |
| 718 | Cassell JA           | 2006 | England        | Europe | Cross sectional | 452    | Yes | Yes | Yes | Yes | No  | MMR        |
| 719 | Hilton S             | 2006 | England        | Europe | Cross sectional | 72     | Yes | Yes | Yes | Yes | No  | MMR        |
| 720 | Dannetun E           | 2005 | Sweden         | Europe | Cross sectional | 203    | Yes | Yes | Yes | Yes | No  | MMR        |
| 721 | Alfredsson           | 2004 | Sweden         | Europe | Cross sectional | 300    | Yes | Yes | Yes | Yes | No  | MMR        |
| 722 | Evans M              | 2001 | England        | Europe | Cross sectional | 48     | Yes | Yes | Yes | Yes | No  | MMR        |
| 723 | Roberts RJ           | 1995 | Wales          | Europe | Cross sectional | 307    | Yes | Yes | Yes | Yes | No  | MMR        |
| 724 | Bag, O and Guney, SA | 2023 | Turkey         | Europe | Cross sectional | 110    | No  | No  | Yes | Yes | Yes | Not stated |

|     |                           |      |                    |               |                 |        |     |     |     |     |     |            |
|-----|---------------------------|------|--------------------|---------------|-----------------|--------|-----|-----|-----|-----|-----|------------|
| 725 | Grechukha, YO et al       | 2023 | Ukraine            | Europe        | Cross sectional | 797    | Yes | Yes | Yes | No  | Yes | Not stated |
| 726 | Miguel, I et al           | 2022 | Portugal           | Europe        | Cross sectional | 309    | No  | No  | Yes | Yes | Yes | Not stated |
| 727 | Sythes L                  | 2022 | England            | Europe        | Cross sectional | 10     | No  | Yes | Yes | Yes | Yes | Not stated |
| 728 | Brunelli L                | 2021 | Italy              | Europe        | Cross sectional | 2557   | Yes | Yes | Yes | Yes | No  | Not stated |
| 729 | Bertoncello C             | 2020 | Italy              | Europe        | Cross sectional | 3685   | Yes | Yes | Yes | Yes | No  | Not stated |
| 730 | Selleri P                 | 2020 | Italy              | Europe        | Cross sectional | 972    | Yes | Yes | Yes | Yes | No  | Not stated |
| 731 | Seoane MD                 | 2020 | Spain              | Europe        | Case control    | 30     | Yes | Yes | Yes | Yes | No  | Not stated |
| 732 | Bianco A                  | 2019 | Italy              | Europe        | Cross sectional | 575    | Yes | Yes | Yes | Yes | No  | Not stated |
| 733 | Cintulová LL              | 2019 | Slovakia           | Europe        | Cross sectional | 875    | Yes | Yes | Yes | Yes | No  | Not stated |
| 734 | Peretti-Watel, P          | 2019 | France             | Europe        | Cross sectional | 25     | Yes | Yes | Yes | Yes | No  | Not stated |
| 735 | Romijnders K.A,G,J.       | 2019 | Netherlands        | Europe        | Cross sectional | 55     | Yes | Yes | Yes | Yes | No  | Not stated |
| 736 | Wood L                    | 2019 | England            | Europe        | Cross sectional | 85     | Yes | Yes | Yes | Yes | No  | Not stated |
| 737 | Bocquier A                | 2018 | France             | Europe        | Cross sectional | 15216  | Yes | Yes | Yes | Yes | No  | Not stated |
| 738 | Vrdelja M                 | 2018 | Slovenia           | Europe        | Cross sectional | 750    | Yes | Yes | Yes | Yes | No  | Not stated |
| 739 | Braczkowska               | 2018 | Poland             | Europe        | Cohort study    | 1239   | No  | No  | No  | Yes | Yes | Not stated |
| 740 | Giambi C                  | 2017 | Italy              | Europe        | Cross sectional | 3130   | Yes | Yes | Yes | Yes | No  | Not stated |
| 741 | Martinez-Diz S.           | 2014 | Spain              | Europe        | Cross sectional | 16     | Yes | Yes | Yes | Yes | No  | Not stated |
| 742 | Avci, D                   | 2023 | Turkiye            | Europe        | Cross sectional | 381    | No  | Yes | Yes | Yes | Yes | Others     |
| 743 | Sherman, S.M.             | 2023 | United Kingdom     | Europe        | Cross sectional | 596    | No  | Yes | Yes | Yes | Yes | Others     |
| 744 | Gundogdu, Z and Sezer, OY | 2023 | Turkey             | Europe        | Cross sectional | 564    | No  | Yes | Yes | Yes | Yes | Others     |
| 745 | Bankiewicz, P             | 2022 | Poland             | Europe        | Cross sectional | 53     | No  | Yes | Yes | Yes | Yes | Others     |
| 746 | Gacs, Z                   | 2022 | Hungary            | Europe        | Cross sectional | 430    | No  | No  | No  | No  | No  | Others     |
| 747 | Huber A.                  | 2020 | Hungary            | Europe        | Cross sectional | 1042   | Yes | Yes | Yes | Yes | No  | Others     |
| 748 | Erb ML                    | 2019 | Switzerland        | Europe        | Cross sectional | 199    | Yes | Yes | Yes | Yes | No  | Others     |
| 749 | Mameli C                  | 2014 | Italy              | Europe        | Cross sectional | 1842   | Yes | Yes | Yes | Yes | No  | Others     |
| 750 | Allaert FA                | 2009 | France and Germany | Europe        | Cross sectional | 2593   | Yes | Yes | Yes | Yes | No  | Others     |
| 751 | Nehab, M. F               | 2023 | Brazil             | South America | Cross sectional | 15297  | No  | Yes | Yes | Yes | Yes | Covid-19   |
| 752 | Benites-Zapata, VA        | 2022 | Colombia and Peru  | South America | Cross sectional | 68980  | No  | No  | No  | No  | Yes | Covid-19   |
| 753 | Martinez, E.Z.            | 2022 | Brazil             | South America | Cross sectional | 1007   | Yes | Yes | Yes | Yes | No  | Covid-19   |
| 754 | Bono, SA                  | 2021 | Brazil             | South America | Cross sectional | 6571   | No  | Yes | Yes | Yes | Yes | Covid-19   |
| 755 | Bagateli, L.E.            | 2021 | Brazil             | South America | Cross sectional | 501    | No  | Yes | Yes | Yes | No  | Covid-19   |
| 756 | Rodrigues E.S.            | 2023 | Brazil             | South America | Cross sectional | 182    | Yes | Yes | Yes | Yes | Yes | HPV        |
| 757 | Olbrich Neto J            | 2023 | Brazil             | South America | Cross sectional | 1261   | No  | Yes | Yes | No  | No  | Mix        |
| 758 | Chung-Delgado, K          | 2021 | Peru               | South America | Cross sectional | 552    | No  | Yes | Yes | Yes | No  | Mix        |
| 759 | Gentile                   | 2021 | Argentina          | South America | Cross sectional | 600    | Yes | Yes | Yes | Yes | No  | Mix        |
| 760 | Burghouts J               | 2017 | Venezuela          | South America | Cross sectional | 67     | Yes | Yes | Yes | Yes | No  | Mix        |
| 761 | Logullo P                 | 2008 | Brazil             | South America | Case control    | 122    | Yes | Yes | Yes | Yes | No  | Mix        |
| 762 | González-Block MA         | 2021 | Peru               | South America | Cross sectional | 160    | Yes | Yes | Yes | Yes | No  | Not stated |
| 763 | Brown AL                  | 2018 | Brazil             | South America | Cross sectional | 952    | Yes | Yes | Yes | Yes | No  | Not stated |
| 764 | Gonzales, A.              | 2022 | Peru               | South America | Cross sectional | 133884 | No  | Yes | Yes | Yes | No  | Others     |
| 765 | Kuan-Mahecha M.A. et al., | 2023 | Guatemala          | South America | Cross sectional | 503    | Yes | No  | Yes | No  | Yes | Mix        |
