# Supplementary material for: Prevalence of caregiver hesitancy for vaccinations in children and its associated factors: A systematic review and meta-analysis
Source: PubMed Central journal article supplement (PMC11500859; doi:10.1371/journal.pone.0302379), 2024-10-24
Supplement: pone.0302379.s008.pdf [file pone.0302379.s008.pdf]

**S4 Table: Quality Assessment for Included Study****Newcastle-Ottawa Quality Assessment Form for Case Control**

| No | Author          | Year | Selection |    |    |    | Comparability | Outcome |    |    | Quality score |
|----|-----------------|------|-----------|----|----|----|---------------|---------|----|----|---------------|
|    |                 |      | S1        | S2 | S3 | S4 |               | O1      | O2 | O3 |               |
| 1  | Hailu, C.       | 2022 | *         | *  | *  | *  | **            | *       | *  |    | Good          |
| 2  | Machekanyanga Z | 2017 |           | *  |    |    | **            | *       |    |    | Fair          |
| 3  | M Muhsen K      | 2012 |           |    |    |    |               | *       |    |    | Poor          |
| 4  | Seoane MD       | 2020 |           |    | *  |    | *             | *       |    |    | Poor          |
| 5  | Logullo P       | 2008 |           |    | *  |    | *             | *       | *  |    | Poor          |
| 6  | Bardenheier B   | 2004 |           |    | *  | *  |               | *       | *  |    | Fair          |
| 7  | Salmon DA       | 2005 |           | *  | *  | *  | *             |         |    |    | Poor          |
| 8  | Abubakar A      | 2019 | *         | *  | *  |    | *             | *       |    |    | Fair          |
| 9  | Mohammed A      | 2014 | *         | *  | *  | *  | *             | *       |    |    | Fair          |

## Newcastle-Ottawa Quality Assessment Scale Case Control Studies

Note: A study can be given a maximum of one star for each numbered item within the Selection and Outcome categories. A maximum of two stars can be given for Comparability.

### Selection

1. Is the case definition adequate?
  - . Yes, with independent validation \*
  - a. Yes, eg record linkage or based on self reports
  - b. No description
2. Representativeness of the cases
  - a. Consecutive or obviously representative series of cases\*
  - b. Potential for selection biases or not stated
1. Selection of Controls
  - a. Community controls\*
  - b. Hospital controls
  - c. No description
2. Definition of Controls
  - a. No history of disease (endpoint)\*
  - b. No description of source

### Comparability

1. Comparability of cases and controls on the basis of the design or analysis
  - a. Study controls for \_\_\_\_\_ (Select the most important factor.)\*
  - b. Study controls for any additional factor\* (This criteria could be modified to indicate specific control for a second important factor.)

### Outcome

1. Ascertainment of exposure
  - a. Secure record (eg surgical records)\*
  - b. Structured interview where blind to case/control status\*
  - c. Interview not blinded to case/control status
  - d. Written self report or medical record only
  - e. No description
1. Same method of ascertainment for cases and controls
  - a. Yes\*
  - b. No
0. Non-Response rate
  - a. Same rate for both groups\*
  - b. Non respondents described

c. Rate different and no designation

Thresholds for converting the Newcastle-Ottawa scales to AHRQ standards (good, fair, and poor):

**Good quality:** 3 or 4 stars in selection domain AND 1 or 2 stars in comparability domain AND 2 or 3 stars in outcome/exposure domain

**Fair quality:** 2 stars in selection domain AND 1 or 2 stars in comparability domain AND 2 or 3 stars in outcome/exposure domain

**Poor quality:** 0 or 1 star in selection domain OR 0 stars in comparability domain OR 0 or 1 stars in outcome/exposure domain

**Modified for Newcastle-Ottawa Quality Assessment Form for Cross sectional**

| No | Author              | Year | Selection |    |    | Comparability | Outcome |    | Quality score |
|----|---------------------|------|-----------|----|----|---------------|---------|----|---------------|
|    |                     |      | S1        | S2 | S3 |               | E1      | E2 |               |
| 1  | Zewdie, A           | 2016 | *         | *  |    | *             |         |    | Poor          |
| 2  | Babirye, J.N        | 2011 | *         |    |    |               |         |    | Poor          |
| 3  | Schwarz, NG         | 2009 | *         |    |    |               |         |    | Poor          |
| 4  | Tadesse, H.         | 2009 | *         |    |    |               |         |    | Poor          |
| 5  | Leach, MA           | 2008 | *         |    |    |               |         |    | Poor          |
| 6  | Cassell, JA         | 2006 | *         | *  |    | *             |         | *  | Fair          |
| 7  | Helman, CG          | 2004 | *         |    |    | *             |         |    | Poor          |
| 8  | Eng, E.             | 1991 | *         |    |    | *             |         |    | Poor          |
| 9  | Cutts, FT           | 1990 | *         |    |    | *             |         |    | Poor          |
| 10 | Carcelen, AC        | 2022 | *         | *  |    | *             |         | *  | Good          |
| 11 | Muluye, M           | 2022 | *         | *  |    | **            |         | *  | Good          |
| 12 | Lubeya M.K. et al., | 2023 | *         |    |    | **            |         | *  | Fair          |
| 13 | Balogun, FM         | 2022 | *         |    |    | **            |         | *  | Fair          |
| 14 | Kolek, C. O.        | 2022 | *         |    |    | **            |         | *  | Fair          |
| 15 | Mihretie, G. N.     | 2022 | *         | *  |    | **            |         | *  | Good          |
| 16 | Milondzo T. et al., | 2022 | *         | *  |    | *             |         | *  | Good          |
| 17 | Popelsky, BK        | 2021 | *         |    | *  | **            |         | *  | Good          |
| 18 | Kamya, C            | 2022 | *         |    |    | **            |         | *  | Fair          |
| 19 | Darebo, TD          | 2022 | *         | *  |    | **            |         | *  | Good          |

|    |                       |      |   |   |   |    |   |   |      |
|----|-----------------------|------|---|---|---|----|---|---|------|
| 20 | Abor J                | 2022 | * |   | * | ** |   | * | Good |
| 21 | Killion JP            | 2022 | * |   |   | *  |   | * | Fair |
| 22 | Tayu B                | 2022 | * |   |   | *  |   | * | Fair |
| 23 | Jalloh, MF            | 2022 | * |   |   | *  |   |   | Poor |
| 24 | Powelson, J           | 2022 | * |   |   | *  |   |   | Poor |
| 25 | Olaniyan, A. et al.,  | 2022 | * |   |   | *  |   |   | Poor |
| 26 | Ames, H.              | 2021 | * |   |   | *  |   |   | Poor |
| 27 | Tabana, H             | 2016 | * |   |   | ** |   | * | Fair |
| 28 | Sabahelzain, M.M.     | 2022 |   |   | * | *  | * | * | Fair |
| 29 | Gil Cuesta, JG        | 2021 | * |   |   | *  |   |   | Poor |
| 30 | Cockcroft, A          | 2014 | * |   |   | *  | * |   | Fair |
| 31 | Mebrate, M.           | 2022 | * | * |   | ** |   | * | Fair |
| 32 | Sulaiman S.K. et al., | 2023 | * |   |   | ** |   | * | Fair |
| 33 | Yeboah, D.            | 2022 | * |   | * | ** |   | * | Good |
| 34 | Immurana, M           | 2021 | * |   |   | ** |   | * | Fair |
| 35 | Wigle J.              | 2023 | * |   |   | ** | * |   | Fair |
| 36 | Shen A.K.             | 2022 | * |   |   | ** |   |   | Poor |
| 37 | Batra, K.             | 2023 | * |   | * | ** |   | * | Good |
| 38 | Davidson, CA et al    | 2023 | * |   | * | ** |   |   | Poor |
| 39 | Durkin, LK            | 2023 | * |   | * | ** |   |   | Poor |
| 40 | Gooding, GD et al     | 2023 | * |   |   | *  |   | * | Fair |
| 41 | Mondal P & Sinharoy A | 2023 | * | * |   | ** |   | * | Good |

|    |                        |      |   |   |   |   |   |   |      |
|----|------------------------|------|---|---|---|---|---|---|------|
| 42 | Kohler, RE et al       | 2023 | * |   | * | * |   |   | Poor |
| 43 | Phan TL                | 2022 | * |   | * | * | * | * | Good |
| 44 | Baumer-Mouradian, S.H. | 2022 | * |   | * | * |   | * | Good |
| 45 | Cioffredi, LA          | 2022 | * |   | * | * | * | * | Good |
| 46 | Guerin, RJ             | 2022 | * |   |   | * | * | * | Good |
| 47 | Hopfer, S              | 2022 | * |   | * | * |   | * | Good |
| 48 | Humble, RM             | 2022 | * | * | * | * | * | * | Good |
| 49 | Kreuter, MW            | 2022 | * |   |   | * |   | * | Fair |
| 50 | Lam, C.N               | 2022 | * |   |   | * | * | * | Good |
| 51 | Limbers, CA            | 2022 | * |   | * | * |   | * | Good |
| 52 | Mangat, C              | 2022 | * | * |   | * |   | * | Good |
| 53 | McElfish, P.A.         | 2022 | * |   |   | * |   | * | Fair |
| 54 | Nguyen, KH             | 2022 | * |   | * | * | * | * | Good |
| 55 | Nguyen, KH             | 2022 | * |   | * | * | * | * | Good |
| 56 | Panchalingam, T.       | 2022 | * | * | * | * |   | * | Good |
| 57 | Reindl, D.             | 2022 | * |   | * | * |   | * | Good |
| 58 | Salazar, TL            | 2022 | * | * | * | * |   | * | Good |
| 59 | Scherer, AM            | 2022 | * |   |   | * |   | * | Fair |
| 60 | Schiff, J.             | 2022 | * |   | * | * |   |   | Poor |
| 61 | Schilling, S           | 2022 | * |   | * | * |   | * | Fair |
| 62 | Skeens, M.             | 2022 | * | * | * | * |   | * | Good |

|    |                             |      |   |   |   |    |   |   |      |
|----|-----------------------------|------|---|---|---|----|---|---|------|
| 63 | Skeens, M. A.               | 2022 | * |   | * | *  |   | * | Good |
| 64 | Suvada, KA                  | 2022 | * | * | * | *  |   | * | Good |
| 65 | Willis, DE                  | 2022 | * |   |   | *  |   | * | Fair |
| 66 | Ruiz JB                     | 2022 | * | * | * | *  |   | * | Good |
| 67 | Lacy, R.                    | 2022 | * |   | * | *  |   | * | Good |
| 68 | Lessard, L                  | 2022 | * |   |   | ** |   | * | Fair |
| 69 | Bonuck, K                   | 2022 | * |   |   | ** |   | * | Fair |
| 70 | Byrne, A                    | 2022 | * |   |   | *  |   | * | Fair |
| 71 | Ellithorpe, ME              | 2022 | * |   | * | *  | * | * | Good |
| 72 | Fisher, C.B.                | 2022 | * | * | * | *  |   |   | Poor |
| 73 | O'Dor SL                    | 2022 | * |   | * | *  |   | * | Good |
| 74 | Baumann, BM                 | 2022 | * |   | * | *  | * | * | Good |
| 75 | Olagoke, A.                 | 2022 | * |   |   | *  |   | * | Fair |
| 76 | Lachance-Grzela, M. et al., | 2022 | * |   | * | *  |   | * | Good |
| 77 | Kheil, M.H. et al.,         | 2022 | * |   | * | *  |   | * | Good |
| 78 | Choi, K. et al.,            | 2022 | * |   |   | *  |   | * | Fair |
| 79 | Zhu, Y                      | 2022 | * |   |   |    |   |   | Poor |
| 80 | Waring, M. E.               | 2022 | * |   |   | *  |   | * | Fair |
| 81 | Delgado-Gallegos, J.L.      | 2021 | * | * | * | *  |   | * | Good |
| 82 | Lackner, CL                 | 2021 | * |   |   | ** |   | * | Fair |
| 83 | Griffith, BC                | 2022 | * |   |   |    |   | * | Poor |

|     |                           |      |   |  |   |    |   |   |      |
|-----|---------------------------|------|---|--|---|----|---|---|------|
| 84  | Sokol, RL and Grummom, AH | 2020 | * |  |   | ** |   | * | Fair |
| 85  | Davis, MM et al           | 2020 | * |  |   | ** |   | * | Fair |
| 86  | Shin, M.B.                | 2023 | * |  |   | ** |   |   | Poor |
| 87  | Jin, SW et al             | 2023 | * |  |   | ** |   | * | Fair |
| 88  | Xiong, S                  | 2022 | * |  |   | *  |   |   | Poor |
| 89  | Margolis M. A. et al.,    | 2022 | * |  |   | ** |   | * | Fair |
| 90  | Newcomer SR               | 2020 | * |  |   |    | * | * | Poor |
| 91  | Pomares TD                | 2020 | * |  | * | ** |   | * | Fair |
| 92  | Yankey D                  | 2020 | * |  |   | ** |   | * | Fair |
| 93  | Duchsherer A. et al.,     | 2020 | * |  |   | ** |   |   | Poor |
| 94  | Beavis A                  | 2018 | * |  |   | ** |   | * | Fair |
| 95  | Krok-Schoen JL            | 2018 | * |  |   | ** |   | * | Fair |
| 96  | Lee Y.M                   | 2018 | * |  |   | ** |   | * | Fair |
| 97  | Brown B                   | 2017 | * |  | * | ** |   | * | Good |
| 98  | Gilbert NL                | 2016 | * |  |   | ** |   | * | Fair |
| 99  | Krawczyk A                | 2015 | * |  |   | ** |   |   | Poor |
| 100 | Perez S                   | 2015 | * |  |   | *  |   |   | Poor |
| 101 | Pitts MJ                  | 2013 | * |  |   | *  |   |   | Poor |
| 102 | Ogilvie G                 | 2010 | * |  |   | ** |   | * | Fair |
| 103 | Nguyen, AT                | 2022 |   |  | * | *  | * | * | Good |
| 104 | Beatty and Villwock       | 2021 | * |  | * | ** |   | * | Good |



|     |                           |      |   |   |   |    |   |   |      |
|-----|---------------------------|------|---|---|---|----|---|---|------|
| 105 | Kempe A                   | 2020 | * |   | * | ** |   | * | Good |
| 106 | Nekrasov E                | 2020 | * | * | * | ** |   | * | Good |
| 107 | Goss MD                   | 2020 | * |   | * | ** |   | * | Good |
| 108 | Baumgaertner, B et al     | 2018 | * |   |   | ** |   | * | Fair |
| 109 | Cameron MA                | 2016 | * |   |   | ** | * | * | Good |
| 110 | Santibanez TA             | 2016 | * |   |   | ** |   | * | Fair |
| 111 | Schellenberg, N.          | 2023 | * |   |   | ** | * | * | Good |
| 112 | Baumer-Mouradian,<br>S.H. | 2022 | * | * | * | *  |   | * | Good |
| 113 | Ellithorpe, M             | 2022 | * |   |   | *  |   | * | Fair |
| 114 | Howell, JL                | 2022 | * |   | * | ** |   | * | Good |
| 115 | Hsu, C                    | 2022 | * |   | * | ** |   |   | Poor |
| 116 | Kaufmann J                | 2022 | * |   |   | ** |   | * | Fair |
| 117 | Letterie MC               | 2022 | * |   |   | ** |   | * | Fair |
| 118 | Nguyen, K.H               | 2022 | * | * |   | *  | * | * | Good |
| 119 | Opel, D. J.               | 2022 | * |   | * | *  |   | * | Good |
| 120 | Shah, MD                  | 2022 | * |   |   | *  |   | * | Fair |
| 121 | Wang, CS                  | 2022 | * |   | * | *  | * | * | Good |
| 122 | Anderson-Chavarria, M     | 2022 | * |   |   | *  |   |   | Poor |
| 123 | Boyce, TG                 | 2022 | * |   | * | *  | * | * | Good |
| 124 | Footman, A                | 2022 | * |   |   | *  |   | * | Fair |
| 125 | Shen, AK                  | 2023 | * |   |   | *  |   |   | Poor |

|     |                                     |      |   |  |   |   |   |   |      |
|-----|-------------------------------------|------|---|--|---|---|---|---|------|
| 126 | Gennaro, E et al                    | 2021 | * |  |   | * | * | * | Good |
| 127 | Langkamp, DL et al                  | 2020 | * |  | * | * |   | * | Good |
| 128 | Navin MC                            | 2019 | * |  |   | * | * | * | Good |
| 129 | Carpiano RM                         | 2019 | * |  | * | * | * | * | Good |
| 130 | Gilkey MB                           | 2016 | * |  | * |   | * | * | Fair |
| 131 | William S.E. et al.,                | 2016 | * |  | * | * | * | * | Good |
| 132 | Frew, PM et al                      | 2016 | * |  | * | * |   | * | Good |
| 133 | Greenfield LS                       | 2015 | * |  | * | * |   | * | Good |
| 134 | Roberts JR                          | 2015 | * |  | * | * | * | * | Good |
| 135 | Wolff ER                            | 2014 | * |  | * | * |   | * | Good |
| 136 | Opel D.J. et al.,                   | 2013 | * |  | * | * | * | * | Good |
| 137 | Bazzano A                           | 2012 | * |  | * | * |   | * | Good |
| 138 | Smith P.J. et al.,                  | 2010 | * |  |   | * |   | * | Fair |
| 139 | Salmon DA                           | 2009 | * |  |   | * |   | * | Fair |
| 140 | Wu AC                               | 2008 | * |  |   | * |   | * | Fair |
| 141 | Bonsu, NE et al                     | 2021 | * |  | * | * | * | * | Good |
| 142 | Holroyd T.A. et al.,                | 2021 | * |  |   | * |   | * | Fair |
| 143 | Wharton-Michael P & Wharton-Clark A | 2020 | * |  |   | * |   |   | Poor |
| 144 | Rodriguez-Nava G. et al.,           | 2020 |   |  |   |   | * | * | Poor |
| 145 | Qian M. et al.,                     | 2020 | * |  |   | * | * | * | Good |
| 146 | Mills, K et al                      | 2020 | * |  |   | * |   |   | Poor |

|     |                            |      |   |   |   |    |   |   |      |
|-----|----------------------------|------|---|---|---|----|---|---|------|
| 147 | Christianson, B et al      | 2020 | * |   |   | *  | * | * | Good |
| 148 | Estep, K and Greenberg, P. | 2020 | * |   |   | *  | * | * | Good |
| 149 | Nyathi S. et al.,          | 2019 |   |   |   | *  | * | * | Poor |
| 150 | Krishna A                  | 2017 |   |   | * | *  |   | * | Fair |
| 151 | Kang G.J. et al.,          | 2017 |   |   |   | *  |   |   | Poor |
| 152 | Cacciatore MA              | 2016 | * |   |   | *  |   | * | Fair |
| 153 | Cataldi, JR et al          | 2016 | * |   | * | *  | * | * | Good |
| 154 | McNutt, LA                 | 2016 | * |   |   | *  | * | * | Good |
| 155 | Lieu, TA et al             | 2015 |   |   | * | *  | * | * | Good |
| 156 | Nyhan B, et al             | 2014 | * |   |   | *  |   | * | Fair |
| 157 | Kennedy A.M & Gust D.A     | 2008 | * |   |   | *  |   |   | Poor |
| 158 | Boyle J                    | 2020 | * |   |   | *  |   | * | Fair |
| 159 | Buttenheim AM              | 2020 | * | * | * | ** |   | * | Good |
| 160 | Mohanty S                  | 2020 | * |   | * | *  |   | * | Good |
| 161 | Buckman, C. et al          | 2020 | * |   |   | *  | * | * | Good |
| 162 | Cataldi JR                 | 2019 | * |   | * | *  |   | * | Good |
| 163 | Cheng ER                   | 2019 | * |   | * | *  |   | * | Good |
| 164 | McCoy JD                   | 2019 | * |   |   | *  |   | * | Fair |
| 165 | McDonald P                 | 2019 | * |   |   | *  |   | * | Fair |
| 166 | Dubé                       | 2019 | * | * | * | *  |   | * | Good |
| 167 | Guay M                     | 2019 |   |   |   | *  |   | * | Poor |

|     |                    |      |   |   |   |    |   |   |      |
|-----|--------------------|------|---|---|---|----|---|---|------|
| 168 | Carrion ML         | 2018 | * |   |   | *  |   |   | Poor |
| 169 | Carrion ML         | 2018 | * |   |   | *  |   |   | Poor |
| 170 | Chung Y            | 2017 | * |   |   | *  |   | * | Fair |
| 171 | Kettunen C.        | 2017 | * |   |   | *  |   |   | Poor |
| 172 | Dubé E             | 2018 | * |   | * | *  |   | * | Good |
| 173 | Blaisdell LL       | 2016 | * |   |   | *  |   |   | Poor |
| 174 | Lee C              | 2016 | * |   |   | ** |   | * | Fair |
| 175 | Dubé E             | 2016 | * |   | * | *  |   |   | Poor |
| 176 | MacDonald SE       | 2014 | * |   | * | *  | * | * | Good |
| 177 | Mergler M.J        | 2013 | * |   |   | *  |   | * | Fair |
| 178 | Luthy KE           | 2012 | * |   |   | *  |   |   | Poor |
| 179 | Luthy KE           | 2010 | * |   |   | *  |   |   | Poor |
| 180 | Kulig JC           | 2002 | * |   |   | *  |   |   | Poor |
| 181 | Sahni LC           | 2020 | * |   | * | *  |   | * | Good |
| 182 | Gromis A & Liu K.Y | 2020 | * |   |   |    | * | * | Poor |
| 183 | Zhou T             | 2023 | * |   | * | *  | * | * | Fair |
| 184 | Zhang H.           | 2023 | * | * | * | *  | * | * | Good |
| 185 | Zhang K            | 2023 | * |   | * | *  | * | * | Good |
| 186 | Bourguiba, A       | 2023 | * |   |   | *  | * | * | Good |
| 187 | Alhuzaimi, AN      | 2023 | * | * | * | *  | * | * | Good |
| 188 | Almuqbil, M.       | 2023 | * | * | * | *  | * | * | Good |
| 189 | Ashour, HA         | 2023 | * | * | * | *  | * | * | Good |

|     |                               |      |   |   |   |   |   |   |      |
|-----|-------------------------------|------|---|---|---|---|---|---|------|
| 190 | Chawanpaiboon S.              | 2023 | * | * | * | * | * | * | Good |
| 191 | Dao, T.L. et al.,             | 2023 | * |   |   | * |   | * | Fair |
| 192 | Deng, JS et al                | 2023 | * | * |   | * | * | * | Good |
| 193 | Ghazy, RM et al               | 2023 | * | * | * | * | * | * | Good |
| 194 | Maneesriwongul W.             | 2023 | * |   | * | * | * | * | Good |
| 195 | Khatrawi, EM and<br>Sayed, AA | 2023 | * | * |   | * | * | * | Good |
| 196 | Khodoruth, MAS et al          | 2023 | * |   | * | * | * | * | Good |
| 197 | Zhou Y                        | 2021 | * |   | * | * | * | * | Good |
| 198 | Zhou, M                       | 2022 | * | * | * | * | * | * | Good |
| 199 | Abdalla, SM                   | 2022 | * |   |   | * |   | * | Fair |
| 200 | Alhazza, SF                   | 2022 | * | * | * | * | * | * | Good |
| 201 | Ali M.                        | 2022 | * | * |   | * | * | * | Good |
| 202 | Ali, M                        | 2022 | * |   |   | * | * | * | Good |
| 203 | Ali-Saleh, O                  | 2022 | * | * | * | * | * | * | Good |
| 204 | Almalki OS                    | 2022 | * |   | * | * | * | * | Good |
| 205 | Chia MY                       | 2022 | * | * | * | * |   | * | Good |
| 206 | Choi, U. I.                   | 2022 | * | * | * | * | * | * | Good |
| 207 | Duong, A.H                    | 2022 | * | * |   | * |   | * | Good |
| 208 | Gunes, O                      | 2022 | * |   |   | * | * | * | Fair |
| 209 | Hou, Z.                       | 2022 | * |   | * | * | * | * | Good |
| 210 | Huang, L.L                    | 2022 | * | * | * | * | * | * | Good |

|     |                 |      |   |   |   |   |   |   |      |
|-----|-----------------|------|---|---|---|---|---|---|------|
| 211 | Khan, YH        | 2022 | * |   | * | * | * | * | Good |
| 212 | Kitro, A        | 2022 | * |   | * | * | * | * | Good |
| 213 | Lee, M.         | 2022 | * |   | * | * | * | * | Good |
| 214 | Li, JB          | 2022 | * |   | * | * | * | * | Good |
| 215 | Low, JM         | 2022 | * |   |   | * | * | * | Good |
| 216 | Lu, L           | 2022 | * |   |   | * |   | * | Good |
| 217 | Ng, DL          | 2022 | * | * | * | * | * | * | Good |
| 218 | Parinyarux, P.  | 2022 | * | * | * | * | * | * | Good |
| 219 | Qin C           | 2022 | * | * | * | * | * | * | Good |
| 220 | Rehman, T       | 2022 | * | * | * | * | * | * | Good |
| 221 | Samudyatha, UC  | 2022 | * |   |   | * | * | * | Good |
| 222 | Shahani, R      | 2022 | * |   | * | * | * | * | Good |
| 223 | Shwethashree, M | 2022 | * | * |   | * | * | * | Good |
| 224 | Tang, S.        | 2023 | * |   | * | * | * | * | Good |
| 225 | Tung, T. H.     | 2022 | * | * |   | * |   | * | Good |
| 226 | Wang, K         | 2022 | * |   | * | * | * | * | Good |
| 227 | Wang, L         | 2022 | * |   |   | * |   | * | Fair |
| 228 | Zhou, X         | 2022 | * |   | * | * | * | * | Good |
| 229 | Khatatbeh, M    | 2022 | * |   | * | * | * | * | Good |
| 230 | Huang, L.L      | 2022 | * |   | * | * | * | * | Good |
| 231 | Abuhammad, S    | 2022 | * |   | * | * | * | * | Good |
| 232 | Aedh, AI        | 2022 | * | * | * | * | * | * | Good |

|     |                |      |   |   |   |    |   |   |      |
|-----|----------------|------|---|---|---|----|---|---|------|
| 233 | AlKetbi, LMB   | 2022 | * |   | * | *  | * | * | Good |
| 234 | Al-khlaiwi, T  | 2022 | * | * | * | *  | * | * | Good |
| 235 | Almansour, A   | 2022 | * | * | * | *  | * | * | Good |
| 236 | Al-Qahtani, AM | 2020 | * | * | * | *  | * | * | Good |
| 237 | Al-Qerem, W    | 2022 | * | * | * | *  | * | * | Good |
| 238 | Alsulaiman, JW | 2022 | * |   | * | *  | * | * | Good |
| 239 | Bord, S        | 2022 | * |   | * | *  | * | * | Good |
| 240 | Elkhadry, S.W. | 2022 | * | * | * | *  | * | * | Good |
| 241 | ElSayed, D.A   | 2022 | * | * | * | *  | * | * | Good |
| 242 | Ennaceur, S.   | 2022 | * |   | * | *  | * | * | Good |
| 243 | Kharaba, Z     | 2022 | * | * | * | *  | * | * | Good |
| 244 | Mohammed, AH   | 2022 | * |   |   | *  |   | * | Fair |
| 245 | Morozov, N. G. | 2022 | * |   |   | *  | * | * | Good |
| 246 | Reagu, S.      | 2022 | * |   | * | *  | * | * | Good |
| 247 | Savitsky, B.   | 2022 | * | * |   | *  |   | * | Good |
| 248 | Swed, S        | 2022 | * | * | * | *  |   | * | Good |
| 249 | Akgün O        | 2022 | * |   |   | *  | * | * | Good |
| 250 | AL-Iede M      | 2022 | * |   |   | ** |   | * | Fair |
| 251 | Al-Rasheedi AT | 2022 | * | * | * | *  | * | * | Good |
| 252 | Bas K          | 2022 | * |   | * | *  | * | * | Good |
| 253 | Çağ Y          | 2022 | * |   |   | *  | * | * | Good |
| 254 | Lau, EY        | 2022 | * |   |   | *  | * | * | Good |

|     |                      |      |   |   |   |   |   |   |      |
|-----|----------------------|------|---|---|---|---|---|---|------|
| 255 | Li, T                | 2022 | * |   |   | * | * | * | Good |
| 256 | Al-Qerem, W          | 2022 | * | * |   | * | * | * | Good |
| 257 | Kocamaz, EB          | 2022 | * | * | * | * | * | * | Good |
| 258 | Tsai, C-S. et al     | 2022 | * |   | * | * |   | * | Good |
| 259 | Cho, HK. et at       | 2022 | * | * |   | * | * | * | Good |
| 260 | Wong L.P. et al.,    | 2022 | * | * | * | * |   | * | Good |
| 261 | Li K. & Zhou F.      | 2022 | * | * | * | * | * | * | Good |
| 262 | Aljamaan, F. et al., | 2022 | * | * | * | * | * | * | Good |
| 263 | Çelik, M.Y.          | 2021 | * | * | * | * | * | * | Good |
| 264 | Almusbah, Z          | 2021 | * |   |   | * | * | * | Good |
| 265 | Altulaihi, BA        | 2021 | * | * | * | * | * | * | Good |
| 266 | Atad, E              | 2021 | * |   |   | * | * | * | Good |
| 267 | Padhi, BK            | 2021 | * | * |   | * |   | * | Good |
| 268 | Choi SH              | 2021 | * | * |   | * | * | * | Good |
| 269 | Wan, X.              | 2021 | * |   | * | * | * | * | Good |
| 270 | Yilmaz, M.           | 2021 | * | * |   | * | * | * | Good |
| 271 | Zhou, Y              | 2021 | * |   |   | * | * | * | Good |
| 272 | Musa, S.             | 2021 | * | * |   | * | * | * | Good |
| 273 | Aldakhil, H.         | 2021 | * | * | * | * | * | * | Good |
| 274 | Samannodi, M.        | 2021 | * | * | * | * | * | * | Good |
| 275 | Shmueli, L.          | 2023 | * |   | * | * | * | * | Good |
| 276 | Gendler Y            | 2021 | * | * | * | * | * | * | Good |



|     |                      |      |   |   |   |    |   |   |      |
|-----|----------------------|------|---|---|---|----|---|---|------|
| 277 | Wang, Z.             | 2021 | * | * | * | *  | * | * | Good |
| 278 | Altulahi, N.         | 2021 | * | * | * | *  | * | * | Good |
| 279 | Feng, H              | 2021 | * |   | * | *  | * | * | Good |
| 280 | Zhou , Y             | 2021 | * |   |   | *  |   | * | Fair |
| 281 | Wang, X.             | 2021 | * |   |   | *  |   | * | Fair |
| 282 | Yoda, T. et al.,     | 2021 | * |   |   | *  | * | * | Good |
| 283 | Horiuchi, S. et al., | 2021 | * |   |   | *  |   | * | Fair |
| 284 | Lin Y et al          | 2021 | * |   |   | ** |   | * | Fair |
| 285 | Lu X                 | 2021 | * |   | * | *  | * | * | Good |
| 286 | Zhang, KC            | 2020 | * |   | * | *  | * | * | Good |
| 287 | Xie, H.              | 2023 | * | * | * | *  |   | * | Good |
| 288 | Babi A.              | 2023 | * |   | * | *  |   | * | Good |
| 289 | Choi, J.             | 2023 | * |   |   | *  |   |   | Poor |
| 290 | Choi. J              | 2021 | * |   | * | *  |   | * | Good |
| 291 | Frianto, D.          | 2022 | * |   | * | *  | * | * | Good |
| 292 | Pearl, CA            | 2022 | * |   | * | *  | * | * | Good |
| 293 | Tubas F              | 2022 | * |   |   | *  |   | * | Fair |
| 294 | Zhang, Z             | 2023 | * |   |   | *  | * | * | Good |
| 295 | Akca, G              | 2022 | * |   | * | *  | * | * | Good |
| 296 | Huang, Z             | 2022 | * |   | * | *  | * | * | Good |
| 297 | Zach, R              | 2022 | * |   |   | *  |   |   | Poor |
| 298 | Imanishi Y           | 2022 | * |   |   | *  | * | * | Good |

|     |                        |      |   |   |   |   |   |   |      |
|-----|------------------------|------|---|---|---|---|---|---|------|
| 299 | Yagi, A                | 2022 | * |   | * | * | * | * | Good |
| 300 | Alkalash, SH           | 2022 | * | * | * | * | * | * | Good |
| 301 | Shuto                  | 2021 | * |   | * | * | * | * | Good |
| 302 | Ugumori                | 2021 | * |   |   | * | * | * | Good |
| 303 | Huang Y                | 2021 | * | * | * | * | * | * | Good |
| 304 | Kobayashi              | 2021 | * |   | * | * | * | * | Good |
| 305 | Miyoshi, A             | 2020 | * |   |   | * | * | * | Good |
| 306 | Yagi A                 | 2018 | * |   |   | * |   | * | Fair |
| 307 | Shida, J               | 2015 | * |   |   | * |   | * | Fair |
| 308 | Egawa-Takata           | 2015 | * |   |   | * | * | * | Good |
| 309 | Hanley                 | 2014 | * |   | * | * |   | * | Good |
| 310 | Hanley S               | 2012 | * |   |   | * | * | * | Good |
| 311 | Al-Qerem, W            | 2023 | * | * | * | * | * | * | Good |
| 312 | Alharbi, I.            | 2023 | * | * |   | * | * | * | Good |
| 313 | Fan, J.                | 2022 | * | * | * | * |   | * | Good |
| 314 | Lai, X                 | 2022 | * | * | * | * |   | * | Good |
| 315 | Abed Elhadi Shahbari N | 2022 | * | * | * | * |   | * | Good |
| 316 | Alenazi, K. A          | 2022 | * |   | * | * | * | * | Good |
| 317 | AlOmran, HA            | 2022 | * | * | * | * | * | * | Good |
| 318 | Hussein, YH            | 2022 | * |   | * | * | * | * | Good |
| 319 | Jiang, M               | 2022 | * | * | * | * |   | * | Good |
| 320 | Zakhour R              | 2021 | * |   | * | * | * | * | Good |

|     |                   |      |   |   |   |   |   |   |      |
|-----|-------------------|------|---|---|---|---|---|---|------|
| 321 | Salawati, E.      | 2021 | * | * | * | * | * | * | Good |
| 322 | Alolayan A        | 2019 | * | * | * | * | * | * | Good |
| 323 | Alabbad AA        | 2018 | * | * | * | * | * | * | Good |
| 324 | Buyuktiryaki B    | 2014 | * |   |   | * | * | * | Good |
| 325 | Akis S            | 2011 | * |   |   | * | * | * | Good |
| 326 | Ahmed, N          | 2023 | * |   | * | * | * | * | Good |
| 327 | Sahoo S. S.       | 2023 | * |   | * | * |   | * | Good |
| 328 | Du, M.            | 2022 | * |   | * | * |   | * | Good |
| 329 | Han, K.           | 2022 | * |   |   | * |   | * | Fair |
| 330 | Khaliq, A         | 2022 | * |   | * | * |   | * | Good |
| 331 | Shaipuzaman, N. A | 2022 | * |   |   | * |   | * | Fair |
| 332 | Sinuraya, R. K.   | 2022 | * |   |   | * |   | * | Fair |
| 333 | Summan, A.        | 2022 | * |   |   | * | * | * | Good |
| 334 | Wachinger, J      | 2022 | * |   |   | * |   |   | Poor |
| 335 | Wang, Q(a)        | 2022 | * |   | * | * |   | * | Good |
| 336 | Akbulut, S        | 2022 | * |   | * | * |   | * | Good |
| 337 | Alghamdi, S       | 2022 | * |   | * | * |   | * | Good |
| 338 | Al-Regaiey, KA    | 2022 | * |   | * | * |   | * | Good |
| 339 | Hijazi, R         | 2022 | * |   |   | * |   |   | Poor |
| 340 | Abu-rish EY       | 2016 | * |   |   | * |   | * | Fair |
| 341 | Ozer, M           | 2022 | * |   |   | * |   | * | Fair |
| 342 | Topaktas B.       | 2022 | * |   |   | * |   | * | Fair |

|     |                         |      |   |   |   |    |   |   |      |
|-----|-------------------------|------|---|---|---|----|---|---|------|
| 343 | Al Yamani, Z.J. et al., | 2022 | * |   | * | *  |   | * | Good |
| 344 | Zin ZM. et al           | 2022 | * |   |   | *  |   |   | Poor |
| 345 | Temsah, MH              | 2021 | * |   | * | *  |   | * | Good |
| 346 | Wang, Q                 | 2021 | * |   | * | *  |   | * | Good |
| 347 | Yilmazbaz, P            | 2021 | * |   | * | *  |   | * | Good |
| 348 | Tal, O                  | 2021 | * |   |   | *  |   | * | Fair |
| 349 | Al-Nafeesah AS          | 2021 | * |   |   |    |   | * | Poor |
| 350 | Baghdadi, LR            | 2021 | * | * | * | *  |   | * | Good |
| 351 | Hou, Z.                 | 2021 | * |   |   | ** |   | * | Fair |
| 352 | Alsubaie SS             | 2019 | * |   | * | *  |   | * | Good |
| 353 | Chang K                 | 2019 | * |   | * | *  |   | * | Good |
| 354 | Jalloh M.F.             | 2019 | * |   |   | *  |   |   | Poor |
| 355 | Amit Aharon A           | 2018 | * |   |   | *  |   | * | Fair |
| 356 | Chan HK                 | 2018 | * |   |   | *  | * | * | Good |
| 357 | Dasgupta P              | 2018 | * |   | * | *  |   | * | Good |
| 358 | Khaliq A.               | 2017 | * |   |   | *  |   |   | Poor |
| 359 | Quaiyum MA              | 2011 | * |   |   | *  |   |   | Poor |
| 360 | Hussein SZ              | 2022 | * |   |   | *  |   | * | Fair |
| 361 | Ashkenazi S             | 2020 | * |   |   | *  |   | * | Fair |
| 362 | Abdullah AC             | 2018 | * |   | * | *  |   | * | Good |
| 363 | Fakhruddin TM et al     | 2023 | * | * | * | *  |   | * | Good |
| 364 | Han Y                   | 2022 | * |   | * | *  |   | * | Good |

|     |                     |      |   |   |   |    |   |   |      |
|-----|---------------------|------|---|---|---|----|---|---|------|
| 365 | Kuan, CI            | 2022 | * |   |   | *  |   |   | Poor |
| 366 | Shen, X             | 2022 | * | * | * | *  |   | * | Good |
| 367 | Alaamri, O.         | 2022 | * |   | * | *  |   | * | Good |
| 368 | Yörük S             | 2021 | * | * | * | *  |   | * | Good |
| 369 | Akhmetzhanova Z     | 2020 | * |   | * | *  |   | * | Good |
| 370 | AlGoraini YM        | 2020 | * | * | * | *  |   |   | Good |
| 371 | Alsuwaidi AR        | 2020 | * |   | * | ** |   | * | Good |
| 372 | Çağ Y               | 2020 | * |   |   | *  |   | * | Fair |
| 373 | Gunes NA            | 2020 | * |   | * | *  |   | * | Good |
| 374 | Kalok A.            | 2020 | * | * | * | *  |   | * | Good |
| 375 | Noyman-Veksler G    | 2020 | * |   | * | *  |   | * | Good |
| 376 | Hu Y                | 2019 | * |   | * | *  |   | * | Good |
| 377 | Ren J               | 2018 | * | * | * | *  |   | * | Good |
| 378 | Sun X               | 2018 | * |   | * | *  |   | * | Good |
| 379 | Noor T              | 2018 | * |   |   | *  |   | * | Fair |
| 380 | Aharony N           | 2017 | * |   | * |    |   |   | Poor |
| 381 | Azizi FS            | 2017 | * | * | * | *  |   | * | Good |
| 382 | Ali HYM             | 2004 | * |   |   | *  | * | * | Good |
| 383 | Gesser-Edelsburga A | 2016 | * |   |   | *  |   |   | Poor |
| 384 | Khowaja AR          | 2012 | * |   |   | *  |   | * | Fair |
| 385 | Qi L                | 2019 | * |   | * | *  |   | * | Good |
| 386 | Yang, Y             | 2022 | * |   | * | *  |   | * | Good |

|     |                     |      |   |   |   |    |   |   |      |
|-----|---------------------|------|---|---|---|----|---|---|------|
| 387 | Al-Iede, M          | 2022 | * |   | * | *  |   | * | Good |
| 388 | Ni, Y-H.            | 2023 | * |   |   | *  | * | * | Good |
| 389 | Du, Y et al         | 2022 | * |   | * | *  |   | * | Good |
| 390 | Khan TM             | 2016 | * |   |   | *  |   |   | Poor |
| 391 | Wang, M             | 2022 | * |   | * | *  |   | * | Good |
| 392 | Sharif Nia et al.,  | 2023 | * |   | * | *  |   | * | Good |
| 393 | Goldman, RD         | 2022 | * |   | * |    |   | * | Fair |
| 394 | Goldman, RD         | 2022 | * | * |   | *  |   | * | Good |
| 395 | Skjefte, M.         | 2021 | * |   |   | ** |   | * | Fair |
| 396 | Goldman, RD         | 2021 | * |   |   |    |   | * | Poor |
| 397 | Goldman RD          | 2020 | * | * |   | *  |   | * | Good |
| 398 | Yilmaz M            | 2023 | * |   | * | *  |   | * | Good |
| 399 | Tekin C.            | 2023 | * |   | * | *  |   | * | Good |
| 400 | Borras-Bermejo B    | 2022 | * |   | * | *  | * | * | Good |
| 401 | Durmaz, N.          | 2022 | * |   | * | *  |   | * | Good |
| 402 | Tan L.              | 2023 | * | * | * | *  |   | * | Good |
| 403 | Reuben R            | 2020 | * |   | * | *  |   | * | Good |
| 404 | Bolsewicz, KT et al | 2023 | * |   |   | *  |   |   | Poor |
| 405 | Wen, LM             | 2022 | * | * | * | *  |   | * | Good |
| 406 | Jeffs, E            | 2021 | * |   | * | *  |   | * | Good |
| 407 | Evans, S            | 2021 | * | * | * | *  |   | * | Good |
| 408 | Biezen R            | 2018 | * |   | * | *  |   | * | Good |

|     |                         |      |   |   |   |   |   |   |      |
|-----|-------------------------|------|---|---|---|---|---|---|------|
| 409 | Jones K                 | 1992 | * |   |   | * | * | * | Good |
| 410 | Wright, D               | 2022 | * |   | * | * |   | * | Good |
| 411 | Debela, M. S.           | 2022 | * | * | * | * |   | * | Good |
| 412 | Enkel SL                | 2018 | * |   |   | * |   |   | Poor |
| 413 | Forbes TA               | 2015 | * |   | * | * | * | * | Good |
| 414 | Tuckerman J             | 2020 | * |   |   | * |   |   | Poor |
| 415 | Bryden GM               | 2019 | * |   |   | * | * | * | Good |
| 416 | Helps C                 | 2019 | * |   |   | * |   |   | Poor |
| 417 | Rossen I                | 2019 | * |   | * | * |   |   | Poor |
| 418 | Rozbroj T               | 2019 | * |   | * | * |   |   | Poor |
| 419 | Attwell K               | 2018 | * |   |   | * |   |   | Poor |
| 420 | Attwell K               | 2018 | * |   |   | * |   |   | Poor |
| 421 | Corben P                | 2018 | * |   | * | * | * | * | Good |
| 422 | Frawley J.E             | 2018 | * |   | * | * |   | * | Good |
| 423 | Attwell K               | 2017 | * |   |   | * |   |   | Poor |
| 424 | Attwell K               | 2016 | * |   |   |   |   | * | Poor |
| 425 | Gilmartin CE            | 2020 | * |   |   | * | * | * | Good |
| 426 | Ates, BO                | 2023 |   |   | * | * |   | * | Good |
| 427 | Bektas, I and Bektas, M | 2023 | * |   | * |   |   | * | Poor |
| 428 | Celik, T and Dogan, D   | 2023 | * |   |   | * |   | * | Fair |
| 429 | Sasic M. et al.,        | 2023 | * |   |   | * |   | * | Fair |
| 430 | Sahin, A. et al.,       | 2023 | * |   |   | * |   | * | Fair |

|     |                         |      |   |   |   |    |   |   |      |
|-----|-------------------------|------|---|---|---|----|---|---|------|
| 431 | Esposito, S. et al      | 2023 | * |   | * | *  |   | * | Good |
| 432 | Ganem, F et al          | 2023 | * |   |   | *  |   | * | Fair |
| 433 | Kozlarek, M.            | 2022 | * |   |   | *  |   | * | Fair |
| 434 | Bianco, A.              | 2022 | * |   |   | *  |   | * | Fair |
| 435 | Di Giuseppe, G.         | 2022 | * |   |   | *  |   | * | Fair |
| 436 | Iannello, P.            | 2022 | * |   | * | *  |   | * | Good |
| 437 | Krakowczyk, J.B.        | 2022 | * |   | * | *  |   |   | Poor |
| 438 | Lecce, M                | 2022 | * | * |   | *  |   | * | Good |
| 439 | Manolescu, L.S.C.       | 2022 | * | * |   | *  |   | * | Good |
| 440 | Marcau, F.C.            | 2022 | * |   |   | *  |   | * | Fair |
| 441 | Miliordos, K            | 2022 | * |   |   | *  |   | * | Fair |
| 442 | Miraglia del Giudice, G | 2022 | * | * | * | *  |   | * | Good |
| 443 | Napoli, A.              | 2022 | * | * |   | *  |   | * | Good |
| 444 | Rees, F                 | 2022 | * |   | * | *  |   | * | Good |
| 445 | Steletou, E             | 2022 | * |   |   | *  |   | * | Fair |
| 446 | Schmidtke, K. A         | 2022 |   |   | * | *  |   | * | Good |
| 447 | Skirrow, H.             | 2022 | * | * |   | *  |   | * | Good |
| 448 | Wagner, A               | 2022 | * |   |   | *  |   | * | Fair |
| 449 | Savarese G.             | 2022 | * |   | * | *  |   | * | Good |
| 450 | Babicki, M              | 2021 | * |   |   | ** |   | * | Fair |
| 451 | Brandstetter, S         | 2021 | * |   |   | *  |   | * | Fair |
| 452 | Fedele                  | 2021 | * |   |   | *  | * | * | Good |



|     |                    |      |   |   |   |   |  |   |      |
|-----|--------------------|------|---|---|---|---|--|---|------|
| 453 | Galanis, P         | 2022 | * |   |   | * |  | * | Fair |
| 454 | Galanis, P         | 2021 | * |   |   | * |  | * | Fair |
| 455 | Seiler, M.         | 2021 | * |   |   | * |  | * | Fair |
| 456 | Zona, S. et al.,   | 2021 | * |   |   | * |  | * | Fair |
| 457 | Russo, L. et al.,  | 2021 | * | * |   | * |  | * | Good |
| 458 | Bell S             | 2020 | * |   |   | * |  | * | Fair |
| 459 | Sobierajski, T.    | 2023 | * |   |   | * |  | * | Fair |
| 460 | S̃trbac M. et al., | 2023 | * |   |   | * |  | * | Fair |
| 461 | Abuduxike G        | 2022 | * |   |   | * |  | * | Fair |
| 462 | Calagna G          | 2022 | * |   |   | * |  | * | Fair |
| 463 | Lopez, N.          | 2022 | * |   | * | * |  | * | Good |
| 464 | Karafillakis, E    | 2022 | * |   |   | * |  |   | Poor |
| 465 | Smolarczyk, K.     | 2022 | * |   |   | * |  | * | Fair |
| 466 | Taylor, J          | 2022 | * |   |   | * |  | * | Fair |
| 467 | Venderbos, J. R.   | 2022 | * |   |   | * |  |   | Poor |
| 468 | Naoum, P           | 2022 | * |   |   | * |  | * | Fair |
| 469 | Lopez, N.          | 2022 | * |   | * | * |  | * | Good |
| 470 | Della Polla G      | 2020 | * |   | * | * |  | * | Good |
| 471 | Waller J           | 2020 | * |   |   | * |  | * | Fair |
| 472 | Teasdale, CA       | 2021 | * |   |   |   |  | * | Poor |
| 473 | Grandahl M         | 2017 | * |   | * | * |  | * | Good |
| 474 | Navarro-Illana P   | 2015 | * |   |   | * |  | * | Fair |

|     |                    |      |   |  |   |    |   |   |      |
|-----|--------------------|------|---|--|---|----|---|---|------|
| 475 | Grandahl M         | 2014 | * |  |   | *  |   |   | Poor |
| 476 | Kornfeld J         | 2013 | * |  | * | *  |   | * | Good |
| 477 | Craciun C          | 2012 | * |  |   | *  |   |   | Poor |
| 478 | Hontelez J.A.C.    | 2010 | * |  | * | *  |   | * | Good |
| 479 | Kiroplis et al.,   | 2023 | * |  |   | *  |   | * | Fair |
| 480 | Di Giuseppe, G.    | 2022 | * |  |   | *  |   |   | Poor |
| 481 | Bielecki K         | 2020 | * |  |   | ** |   | * | Fair |
| 482 | Gorman D.R         | 2020 | * |  | * | *  |   | * | Good |
| 483 | Prospero E         | 2019 | * |  |   | *  |   | * | Fair |
| 484 | Rodríguez-Blanco N | 2019 | * |  |   | *  |   | * | Fair |
| 485 | P. Paterson        | 2018 | * |  |   | *  |   |   | Poor |
| 486 | Bults M            | 2011 | * |  |   | *  |   | * | Fair |
| 487 | Brown K.F          | 2010 | * |  |   | *  |   | * | Fair |
| 488 | Gjini, E.          | 2023 | * |  | * | *  |   | * | Good |
| 489 | Duran, S et al     | 2023 | * |  | * | *  | * | * | Good |
| 490 | Marron, L. et al   | 2023 | * |  | * | *  | * | * | Good |
| 491 | Buonsenso, D       | 2022 | * |  |   | *  | * | * | Good |
| 492 | Deml, MJ           | 2022 | * |  |   | *  |   |   | Poor |
| 493 | Derdemezis, C.     | 2022 | * |  | * | ** |   | * | Good |
| 494 | Ebi, SJ            | 2022 | * |  | * | ** |   | * | Good |
| 495 | Fakonti, G         | 2022 | * |  |   | *  |   | * | Fair |
| 496 | Jafflin, K         | 2022 | * |  | * | *  |   | * | Good |

|     |                    |      |   |   |   |    |   |   |      |
|-----|--------------------|------|---|---|---|----|---|---|------|
| 497 | Miron, V. D.       | 2022 | * |   |   | *  |   | * | Fair |
| 498 | Napolitano, F      | 2022 | * |   | * | ** |   | * | Good |
| 499 | Nurmi, J           | 2022 | * |   |   | ** |   |   | Poor |
| 500 | Skitarelić, N.     | 2022 | * |   |   | *  |   |   | Poor |
| 501 | Van Hoecke, A.L.   | 2022 | * | * | * | *  |   | * | Good |
| 502 | Ourania Z. et al., | 2022 | * |   |   | *  |   |   | Poor |
| 503 | Akman N & Yildiz A | 2022 | * |   | * | *  |   | * | Good |
| 504 | Caso, D            | 2022 | * | * |   | *  |   | * | Good |
| 505 | Fonseca, IC        | 2021 | * |   | * | *  |   | * | Good |
| 506 | Stoeckel, F        | 2021 |   |   |   |    | * | * | Poor |
| 507 | Whelan SO          | 2021 | * |   | * | *  |   | * | Good |
| 508 | Ruggiero, KM       | 2021 | * |   | * | *  |   | * | Good |
| 509 | Byström E          | 2020 | * |   |   | *  |   | * | Fair |
| 510 | Charron J          | 2020 | * |   |   | *  |   | * | Fair |
| 511 | Facciola A         | 2019 | * |   |   | *  |   | * | Fair |
| 512 | Miko D             | 2019 | * |   | * | *  |   |   | Poor |
| 513 | Napolitano F       | 2018 | * |   | * | *  |   | * | Good |
| 514 | Olszewska M        | 2018 | * |   |   | *  | * | * | Good |
| 515 | Tho,SL             | 2015 | * |   |   | *  |   | * | Fair |
| 516 | Dáňová J           | 2015 | * |   |   | *  | * |   | Fair |
| 517 | Harmsen IA (a)     | 2013 | * |   |   | *  |   | * | Fair |
| 518 | Harmsen IA (b)     | 2013 | * |   |   | *  |   |   | Poor |

|     |                      |      |   |   |   |   |   |   |      |
|-----|----------------------|------|---|---|---|---|---|---|------|
| 519 | Harmsen IA           | 2012 | * |   |   | * |   |   | Poor |
| 520 | Borràs E             | 2009 | * |   |   | * | * | * | Good |
| 521 | Stampi S             | 2005 |   |   |   | * | * |   | Poor |
| 522 | Kirkedal, A-B.       | 2022 | * |   |   | * |   |   | Poor |
| 523 | Jama A               | 2018 | * |   |   | * |   |   | Poor |
| 524 | Campbell             | 2017 | * |   |   | * | * |   | Fair |
| 525 | Mchale P             | 2016 | * |   |   | * | * |   | Fair |
| 526 | Weiss C              | 2016 | * |   |   | * |   | * | Fair |
| 527 | Restivo V            | 2015 | * |   |   | * | * | * | Fair |
| 528 | Byström E            | 2014 | * |   |   | * |   |   | Poor |
| 529 | Casiday R            | 2006 | * |   |   | * | * | * | Good |
| 530 | Cassell JA           | 2006 | * | * |   | * | * | * | Good |
| 531 | Hilton S             | 2006 | * |   |   | * |   |   | Poor |
| 532 | Dannetun E           | 2005 | * |   |   | * | * | * | Good |
| 533 | Alfredsson           | 2004 | * |   |   | * | * | * | Good |
| 534 | Evans M              | 2001 | * |   |   | * |   |   | Poor |
| 535 | Roberts RJ           | 1995 | * |   |   | * | * | * | Good |
| 536 | Bag, O and Guney, SA | 2023 | * |   |   | * |   | * | Fair |
| 537 | Grechukha, YO et al  | 2023 | * |   |   | * |   | * | Fair |
| 538 | Miguel, I et al      | 2022 | * |   | * | * |   | * | Good |
| 539 | Sythes L             | 2022 | * |   |   | * |   |   | Poor |
| 540 | Bertoncello C        | 2020 | * |   |   | * |   | * | Fair |

|     |                           |      |   |   |   |    |   |   |      |
|-----|---------------------------|------|---|---|---|----|---|---|------|
| 541 | Selleri P                 | 2020 | * |   |   | *  |   | * | Fair |
| 542 | Bianco A                  | 2019 | * |   | * | *  |   | * | Good |
| 543 | Cintulová LL              | 2019 | * |   |   | *  |   | * | Fair |
| 544 | Peretti-Watel. P          | 2019 | * |   |   | *  |   |   | Poor |
| 545 | Romijnders K.A,G,J.       | 2019 | * |   |   | *  |   |   | Poor |
| 546 | Wood L                    | 2019 | * |   | * | *  |   | * | Good |
| 547 | Bocquier A                | 2018 | * |   |   | *  |   | * | Fair |
| 548 | Vrdelja M                 | 2018 | * |   |   | *  |   |   | Poor |
| 549 | Giambi C                  | 2017 | * |   |   | *  |   | * | Fair |
| 550 | Martinez-Diz S.           | 2014 | * |   |   | *  |   |   | Poor |
| 551 | Avci, D                   | 2023 |   | * |   |    |   | * | Poor |
| 552 | Sherman, S.M.             | 2023 | * | * |   | *  |   | * | Good |
| 553 | Gundogdu, Z and Sezer, OY | 2023 | * |   |   | ** |   | * | Fair |
| 554 | Bankiewicz, P             | 2022 | * |   |   | *  |   |   | Poor |
| 555 | Gacs, Z                   | 2022 | * |   |   | *  |   | * | Fair |
| 556 | Huber A.                  | 2020 | * |   |   | *  |   | * | Fair |
| 557 | Erb ML                    | 2019 | * | * |   | *  | * | * | Good |
| 558 | Mameli C                  | 2014 | * |   |   | *  |   | * | Fair |
| 559 | Allaert FA                | 2009 | * |   |   | *  |   | * | Fair |
| 560 | Benites-Zapata, VA        | 2022 | * | * | * | *  |   | * | Good |
| 561 | Martinez, E.Z.            | 2022 |   | * | * | *  |   | * | Good |

|     |                             |      |   |  |   |    |   |   |      |
|-----|-----------------------------|------|---|--|---|----|---|---|------|
| 562 | Nehab, M. F                 | 2023 | * |  |   | *  |   | * | Fair |
| 563 | Bono, SA                    | 2021 | * |  |   | *  |   | * | Fair |
| 564 | Rodrigues E.S.              | 2023 | * |  |   | *  | * | * | Good |
| 565 | Olbrich Neto J              | 2023 | * |  |   | *  |   | * | Fair |
| 566 | Chung-Delgado, K            | 2021 | * |  | * | *  |   |   | Poor |
| 567 | Kyei-Arthur, F              | 2022 | * |  |   | *  |   | * | Fair |
| 568 | Al-Wutayd, O                | 2022 | * |  |   | *  |   | * | Fair |
| 569 | Elit L                      | 2022 | * |  |   | *  |   |   | Poor |
| 570 | Horn, S                     | 2022 | * |  |   | ** |   | * | Fair |
| 571 | Kemeugni Ngandjon, J.       | 2022 | * |  |   | *  |   | * | Fair |
| 572 | Idris, I. O.                | 2022 | * |  |   | ** |   | * | Fair |
| 573 | Vasudevan L                 | 2020 | * |  |   | *  |   | * | Fair |
| 574 | Kagone, M                   | 2018 | * |  |   | *  |   |   | Poor |
| 575 | Abakar, M.F.                | 2018 | * |  |   | ** |   |   | Poor |
| 576 | Tadesse, T.                 | 2017 | * |  |   | *  |   |   | Poor |
| 577 | Handy, LK                   | 2017 | * |  |   | *  |   |   | Poor |
| 578 | Asmare, G.                  | 2022 | * |  | * | *  | * | * | Good |
| 579 | Dejene, H.                  | 2022 | * |  |   | *  |   | * | Fair |
| 580 | Abdullahi MF                | 2020 | * |  |   | *  |   |   | Poor |
| 581 | Tefera YA                   | 2018 | * |  | * | *  |   | * | Fair |
| 582 | Mcknight, J and Holt,<br>DB | 2014 | * |  |   | *  |   |   | Poor |

|     |                   |      |   |   |   |   |   |   |      |
|-----|-------------------|------|---|---|---|---|---|---|------|
| 583 | Dugas M           | 2009 | * |   |   | * |   |   | Poor |
| 584 | Antai D           | 2008 |   |   | * | * |   |   | Poor |
| 585 | Asmare, G.        | 2022 | * | * | * | * |   | * | Good |
| 586 | Opel D.J. et al., | 2013 | * |   | * |   |   | * | Poor |
| 587 | Fleming, JA       | 2019 | * |   |   | * | * |   | Fair |
| 588 | Stamidis, KV      | 2019 | * |   |   | * |   |   | Poor |
| 589 | Umeh GC           | 2018 | * |   |   | * |   |   | Poor |
| 590 | Closser, S        | 2016 | * |   |   | * | * |   | Fair |
| 591 | Giles-Vernick, T  | 2016 | * |   |   | * |   |   | Poor |
| 592 | Gilkey MB         | 2013 | * |   | * | * |   | * | Fair |
| 593 | Obute JA          | 2007 | * |   |   | * |   |   | Poor |
| 594 | Renne, E          | 2006 |   |   |   | * |   |   | Poor |
| 595 | Allen, JD         | 2023 | * |   | * | * | * | * | Good |
| 596 | Hill, AV          | 2022 | * |   |   | * |   |   | Poor |
| 597 | Ali S             | 2022 | * |   |   | * | * | * | Good |
| 598 | de St Maurice, A. | 2022 | * |   |   | * |   | * | Fair |
| 599 | Delgado, JR       | 2022 | * |   |   | * |   |   | Poor |
| 600 | Drouin, O.        | 2022 | * |   | * | * |   | * | Fair |
| 601 | Egbert N          | 2022 | * |   |   | * |   |   | Poor |
| 602 | Goulding, M       | 2022 | * |   |   | * |   |   | Poor |
| 603 | Gray A            | 2022 | * |   |   | * |   | * | Fair |
| 604 | Hammershaimb, EA  | 2022 | * |   |   | * |   | * | Fair |

|     |                |      |   |   |   |    |   |   |      |
|-----|----------------|------|---|---|---|----|---|---|------|
| 605 | Head, K.J      | 2022 | * |   |   | *  |   |   | Poor |
| 606 | Temple, AM     | 2022 | * |   |   | *  | * | * | Good |
| 607 | Santibanez, TA | 2022 | * |   |   | *  | * | * | Good |
| 608 | Wang, CH       | 2022 | * |   |   | *  |   | * | Fair |
| 609 | Yeo, J         | 2022 | * |   |   | *  |   |   | Poor |
| 610 | Alfieri, N. L  | 2021 | * |   |   | *  |   | * | Fair |
| 611 | Humble, RM     | 2021 | * | * |   | ** |   | * | Good |
| 612 | Marquez, RR    | 2021 | * |   |   | *  |   | * | Fair |
| 613 | McKinnon, B.   | 2021 | * |   |   | *  |   | * | Fair |
| 614 | Szilagy, PG    | 2021 | * | * |   | ** |   | * | Good |
| 615 | Teasdale, CA   | 2021 | * |   |   |    |   | * | Poor |
| 616 | Anuforo, B.    | 2022 | * |   |   | *  |   | * | Fair |
| 617 | Ayash, C       | 2022 | * |   |   | *  |   | * | Fair |
| 618 | Ayres, S       | 2022 |   |   |   |    |   | * | Poor |
| 619 | Beavis, AL     | 2022 | * |   | * | *  |   |   | Poor |
| 620 | Dundar, Y.     | 2021 | * |   |   |    |   | * | Poor |
| 621 | Lee, G.        | 2022 | * |   |   | *  |   | * | Fair |
| 622 | Rositch, A. F. | 2022 | * |   | * | *  | * | * | Good |
| 623 | Thompson, EL   | 2022 | * |   | * | *  |   | * | Good |
| 624 | Tsui, J.       | 2022 | * |   | * | *  |   | * | Good |
| 625 | Varisco, T. J. | 2022 | * |   |   | *  |   | * | Fair |
| 626 | Vasudevan, L.  | 2022 | * |   |   | *  |   | * | Fair |



|     |                           |      |   |  |   |    |   |   |      |
|-----|---------------------------|------|---|--|---|----|---|---|------|
| 627 | Vu, M                     | 2022 | * |  | * | *  |   | * | Good |
| 628 | Myhre A                   | 2020 | * |  |   | *  |   | * | Fair |
| 629 | Auslander BA              | 2019 | * |  |   | *  |   |   | Poor |
| 630 | Hirth JM                  | 2019 |   |  |   | *  | * | * | Poor |
| 631 | Thomas TL                 | 2019 | * |  | * | *  | * |   | Good |
| 632 | Hanson KE                 | 2018 | * |  |   | *  | * | * | Good |
| 633 | Albright K                | 2017 | * |  |   | *  |   |   | Poor |
| 634 | Gilkey MB                 | 2017 | * |  |   | *  |   | * | Fair |
| 635 | Thompson EL               | 2017 | * |  |   | *  | * | * | Fair |
| 636 | Dorell C                  | 2014 | * |  |   | ** |   | * | Fair |
| 637 | Staras SA                 | 2014 | * |  | * |    |   | * | Poor |
| 638 | Dempsey AF                | 2009 | * |  |   | *  | * |   | Fair |
| 639 | Toffolon-Weiss M          | 2008 | * |  |   | *  |   |   | Poor |
| 640 | Fogel BN                  | 2020 | * |  |   | *  |   | * | Fair |
| 641 | Hofstetter AM             | 2018 | * |  | * | *  |   | * | Good |
| 642 | Strelitz B                | 2015 | * |  | * | *  |   | * | Good |
| 643 | Frew PM                   | 2011 | * |  |   | ** |   | * | Fair |
| 644 | Freeman RE                | 2022 |   |  |   | *  | * | * | Good |
| 645 | He, K                     | 2022 | * |  | * | *  |   | * | Good |
| 646 | Kuan-Mahecha M.A. et al., | 2023 | * |  | * | ** | * | * | Good |
| 647 | Deas J                    | 2018 | * |  |   | *  |   |   | poor |

|     |                    |      |   |   |   |    |   |   |      |
|-----|--------------------|------|---|---|---|----|---|---|------|
| 648 | Darden PM          | 2013 | * |   |   |    | * | * | Poor |
| 649 | Freed GL           | 2010 | * |   |   | *  |   | * | Fair |
| 650 | Gowda C            | 2013 | * |   |   | *  |   | * | Fair |
| 651 | Downs, JS et al    | 2013 | * | * |   | *  |   | * | Good |
| 652 | Dempsey AF, et al. | 2011 | * |   |   | *  |   | * | Fair |
| 653 | Dudley MZ          | 2020 | * |   | * | *  |   | * | Good |
| 654 | Finkelstein SR     | 2020 | * |   | * | *  |   | * | Good |
| 655 | Arora G            | 2019 | * |   |   | *  |   | * | Fair |
| 656 | Eller NM           | 2019 | * |   | * | *  |   | * | Good |
| 657 | Gilkey MB          | 2016 | * |   |   |    | * |   | Poor |
| 658 | Estep KA           | 2018 | * |   |   | *  | * | * | Good |
| 659 | Amin AB            | 2017 | * |   | * | *  |   | * | Good |
| 660 | Wang E             | 2015 | * |   |   | ** |   |   | Poor |
| 661 | Glanz JM           | 2013 | * |   |   | *  | * | * | Good |
| 662 | Smith PJ           | 2011 | * |   |   | *  |   | * | Fair |
| 663 | Gullion JS         | 2008 | * |   |   | *  |   |   | Poor |
| 664 | Gust D. A          | 2008 | * |   |   | *  | * | * | Good |
| 665 | Fredrickson DD     | 2004 | * |   |   | *  |   |   | Poor |
| 666 | Goin-Kochel RP     | 2020 | * |   | * | *  | * | * | Good |
| 667 | Bardenheier B      | 2003 | * |   |   | *  |   | * | Fair |
| 668 | Staras, SA         | 2022 | * |   | * |    |   |   | Poor |
| 669 | Ma, L.             | 2022 | * |   |   | *  |   | * | Fair |

|     |             |      |   |   |   |   |   |   |      |
|-----|-------------|------|---|---|---|---|---|---|------|
| 670 | Ma, Y       | 2022 | * |   | * | * |   | * | Good |
| 671 | Mohan, R.   | 2022 | * |   | * | * |   | * | Good |
| 672 | Wang, LJ    | 2022 | * |   | * | * |   | * | Good |
| 673 | Wang, Q (a) | 2022 | * |   | * | * |   | * | Good |
| 674 | Wong, WH    | 2022 | * |   |   | * |   | * | Fair |
| 675 | Yang, J     | 2022 | * |   | * | * |   | * | Good |
| 676 | Zheng, M    | 2022 | * |   |   | * |   | * | Fair |
| 677 | Zheng, Z    | 2023 | * |   |   | * |   | * | Fair |
| 678 | Shati, A.A. | 2022 | * |   |   | * |   | * | Fair |
| 679 | Xu, Y       | 2021 | * |   |   | * |   | * | Fair |
| 680 | Yigit, M    | 2021 | * |   |   | * |   | * | Fair |
| 681 | Nguyen, LH  | 2022 | * |   |   | * |   | * | Fair |
| 682 | Degarege A  | 2018 | * | * | * | * |   | * | Good |
| 683 | Liao, Q     | 2022 | * |   |   | * |   | * | Fair |
| 684 | Zhang, H    | 2022 | * | * |   | * | * | * | Good |
| 685 | Mishra, K.  | 2023 | * | * |   | * | * | * | Good |
| 686 | Wu, L       | 2022 | * | * | * | * |   | * | Good |
| 687 | Yalcin, SS  | 2022 | * |   |   | * |   | * | Fair |
| 688 | Yalçin SS   | 2020 | * |   |   | * |   |   | Poor |
| 689 | Li, L       | 2022 | * | * |   | * |   | * | Good |
| 690 | Wang, X     | 2022 | * |   |   | * |   | * | Fair |
| 691 | Sabra, HK   | 2022 | * |   |   | * |   | * | Fair |

|     |                     |      |   |   |   |    |   |   |      |
|-----|---------------------|------|---|---|---|----|---|---|------|
| 692 | Urrunaga-Pastor, D. | 2021 | * |   |   | *  |   | * | Fair |
| 693 | Runngren, E.        | 2021 | * |   |   | *  |   |   | Poor |
| 694 | Price, T            | 2022 | * |   |   | *  |   |   | Poor |
| 695 | De Gioia, E.R.      | 2022 | * |   |   | *  |   | * | Fair |
| 696 | Brunelli L          | 2021 | * |   |   | *  |   |   | Poor |
| 697 | Bagateli, L.E.      | 2021 | * | * | * | *  |   | * | Good |
| 698 | Gentile             | 2021 | * |   | * | *  | * | * | Good |
| 699 | Burghouts J         | 2017 | * |   |   | *  | * |   | Fair |
| 700 | González-Block MA   | 2021 | * |   |   | ** |   | * | Fair |
| 701 | Brown AL            | 2018 | * | * |   | *  |   | * | Good |
| 702 | Gonzales, A.        | 2022 | * |   | * | *  | * | * | Good |
| 703 | Tianshuo Z          | 2022 | * |   | * | *  |   | * | Good |
| 704 | Yuen WW             | 2018 | * |   |   | *  |   | * | Fair |
| 705 | Zhu X               | 2023 | * |   | * | *  |   | * | Good |
| 706 | Chido-Amajuoyi, OG  | 2022 | * |   |   |    | * | * | Poor |
| 707 | Xu Y                | 2021 | * |   | * | *  |   | * | Good |
| 708 | Moyer-Guse E        | 2018 | * |   | * | *  |   | * | Good |
| 709 | Egawa-Takata        | 2020 | * |   |   | ** | * | * | Good |
| 710 | Reich J A           | 2020 | * |   |   |    | * |   | Poor |
| 711 | Rumetta J           | 2020 | * | * | * | ** |   |   | Poor |

## NEWCASTLE - OTTAWA QUALITY ASSESSMENT SCALE

(adapted for cross-sectional studies)

### **Selection: (Maximum 3 stars)**

1) Representativeness of the sample:

- a) Truly representative of the average in the target population. \* (all subjects or random sampling)
- b) Somewhat representative of the average in the target population. \* (non-random sampling)
- c) Selected group of users.
- d) No description of the sampling strategy.

2) Non-respondents:

- a) Comparability between respondents and non-respondents characteristics is established, and the response rate is satisfactory. \*
- b) The response rate is unsatisfactory, or the comparability between respondents and non-respondents is unsatisfactory.
- c) No description of the response rate or the characteristics of the responders and the non-responders.

3) Ascertainment of the exposure (risk factor):

- a) Validated measurement tool.\*
- b) Non-validated measurement tool, but the tool is available or described.
- c) No description of the measurement tool.

### **Comparability: (Maximum 2 stars)**

1) The subjects in different outcome groups are comparable, based on the study design or analysis.

Confounding factors are controlled.

- a) The study controls for the most important factor (select one).\*
- b) The study control for any additional factor.\*

### **Outcome: (Maximum 2 stars)**

1) Assessment of the outcome:

- a) Independent blind assessment.\*

- b) Record linkage.\*
- c) Self report.
- d) No description.

## **2) Statistical test:**

- a) The statistical test used to analyze the data is clearly described and appropriate, and the measurement of the association is presented, including confidence intervals and the probability level (p value). \*
- b) The statistical test is not appropriate, not described or incomplete.

This scale has been adapted from the Newcastle-Ottawa Quality Assessment Scale for cohort and case-control studies to perform a quality assessment of cross-sectional studies for the systematic review, “Exposure to second-hand smoke and the risk of tuberculosis in children and adults: systematic review and a meta-analysis of 18 observational studies”. This scale was a modified version of the NOS scale, as also used by several other studies that have felt the need to adapt the NOS scale so as to appropriately assess the quality of cross-sectional studies.

We did a comprehensive search on literature and found that a NOS score of 7 or more can be considered a “good” study (see McPheeters et al. 2012; see Appendix G page 103-104 in <http://www.ncbi.nlm.nih.gov/pubmedhealth/PMH0049229/>). So we used this criterion as a cut off for good quality study.

## **References**

Wells, G. A., Shea, B., O'Connell, D., Peterson, J., Welch, V., et al. The Newcastle-Ottawa Scale (NOS) for assessing the quality of nonrandomized studies in meta-analysis. 2011.

[http://www.ohri.ca/programs/clinical\\_epidemiology/oxford.asp](http://www.ohri.ca/programs/clinical_epidemiology/oxford.asp)

McPheeters, M.L., Kripalini, S., Peterson, N.B., Idowu, R.T. et al. (2012). Quality Improvement Interventions To Address Health Disparities. Evidence Report/ technology Assessment. Rockville (MD): Agency for Healthcare Research and Quality (US).

<http://www.ncbi.nlm.nih.gov/pubmedhealth/PMH0049222/pdf/TOC.pdf>

### Newcastle-Ottawa Quality Assessment Form for Cohort

| No | Author                 | Year | Selection |    |    |    | Comparability | Outcome |    |    | Quality score |
|----|------------------------|------|-----------|----|----|----|---------------|---------|----|----|---------------|
|    |                        |      | S1        | S2 | S3 | S4 |               | O1      | O2 | O3 |               |
| 1  | Gahr, P et al          | 2014 | *         |    | *  | *  |               | *       | *  |    | Poor          |
| 2  | Yousaf A. R.           | 2023 | *         | *  | *  | *  | **            |         | *  | *  | Good          |
| 3  | Wojcicki, JM et al     | 2022 | *         | *  | *  |    | *             |         |    | *  | Fair          |
| 4  | Arrigoni, L            | 2023 | *         |    |    | *  |               |         | *  | *  | Fair          |
| 5  | Cole JW                | 2022 |           |    | *  | *  | **            | *       |    | *  | Fair          |
| 6  | Sugerman, DE et al     | 2010 | *         |    | *  | *  |               | *       |    |    | Fair          |
| 7  | Amdisen L              | 2018 | *         |    | *  | *  | *             | *       |    | *  | Good          |
| 8  | Hetherington, E        | 2021 | *         | *  | *  |    | *             |         | *  | *  | Good          |
| 9  | Armiento R             | 2020 | *         | *  | *  | *  | **            | *       | *  | *  | Good          |
| 10 | Brabin L               | 2008 | *         | *  | *  | *  |               | *       | *  |    | Fair          |
| 11 | Fair E                 | 2002 |           |    | *  | *  | *             | *       |    |    | Fair          |
| 12 | Dubé E                 | 2016 |           | *  |    |    | *             | *       | *  |    | Fair          |
| 13 | Delamater PL           | 2018 | *         | *  | *  | *  | *             | *       | *  | *  | Good          |
| 14 | Srivastava, T          | 2022 | *         | *  | *  | *  | **            | *       |    | *  | Good          |
| 15 | Parker A.A. et al.,    | 2006 | *         |    | *  | *  | *             | *       |    |    | Fair          |
| 16 | Dayton, L.             | 2022 | *         | *  |    | *  | **            |         | *  |    | Fair          |
| 17 | Fisher, W.A            | 2022 | *         |    | *  | *  |               |         |    |    | Poor          |
| 18 | Cui Z. et al.,         | 2022 | *         | *  |    | *  | **            | *       |    |    | Fair          |
| 19 | Fuchs, EL              | 2016 | *         | *  | *  | *  |               | *       |    |    | Fair          |
| 20 | Middleman A.B. et al., | 2021 | *         |    |    | *  | **            | *       |    |    | Fair          |

|    |                       |      |   |   |   |   |    |   |   |   |      |
|----|-----------------------|------|---|---|---|---|----|---|---|---|------|
| 21 | Newcomer S.R. et al., | 2021 | * |   | * | * |    | * |   |   | Fair |
| 22 | Wolf E. et al.,       | 2016 | * |   | * | * |    | * |   |   | Fair |
| 23 | Doll, MK et al        | 2021 | * |   | * | * |    | * | * |   | Good |
| 24 | Greyson D             | 2017 | * |   | * | * |    |   |   |   | Poor |
| 25 | Henrikson NB          | 2017 | * | * | * | * | *  | * |   | * | Good |
| 26 | Betsch C              | 2018 | * | * | * | * | ** | * |   | * | Good |
| 27 | Gaudino JA            | 2012 | * |   |   | * |    |   |   |   | Poor |
| 28 | Tavakoli, N           | 2022 | * |   |   | * | *  |   |   |   | Fair |
| 29 | Zhang MX              | 2021 | * | * |   | * | *  |   |   |   | Fair |
| 30 | Ji, M                 | 2022 | * |   | * | * |    |   | * |   | Fair |
| 31 | Carlsona, SJ          | 2022 | * | * |   | * | *  |   | * |   | Good |
| 32 | Smith LE              | 2022 | * | * |   | * | *  |   |   |   | Fair |
| 33 | Ceannt, R             | 2022 | * | * |   | * |    |   |   |   | Fair |
| 34 | Smith, L.E.           | 2019 | * |   | * | * | *  |   | * |   | Good |
| 35 | Montalti, M.          | 2021 | * | * |   | * | *  |   | * |   | Good |
| 36 | Herdea, V             | 2022 | * | * | * | * |    | * | * |   | Good |
| 37 | Lewandowska A         | 2020 | * | * |   | * | *  |   | * |   | Good |
| 38 | Anello P              | 2017 | * |   | * |   | *  | * | * |   | Fair |
| 39 | Braczkowska           | 2018 | * | * |   | * |    |   | * |   | Good |
| 40 | Goldman, RD           | 2022 | * | * |   | * | *  |   | * |   | Good |



## Newcastle-Ottawa Quality Assessment Form for Cohort Studies

Note: A study can be given a maximum of one star for each numbered item within the Selection and Outcome categories. A maximum of two stars can be given for Comparability.

### Selection

- 1) Representativeness of the exposed cohort
  - a) Truly representative (*one star*)
  - b) Somewhat representative (*one star*)
  - c) Selected group
  - d) No description of the derivation of the cohort
- 2) Selection of the non-exposed cohort
  - a) Drawn from the same community as the exposed cohort (*one star*)
  - b) Drawn from a different source
  - c) No description of the derivation of the non exposed cohort
- 3) Ascertainment of exposure
  - a) Secure record (e.g., surgical record) (*one star*)
  - b) Structured interview (*one star*)
  - c) Written self report
  - d) No description
  - e) Other
- 4) Demonstration that outcome of interest was not present at start of study
  - a) Yes (*one star*)
  - b) No

### Comparability

- 1) Comparability of cohorts on the basis of the design or analysis controlled for confounders
  - a) The study controls for age, sex and marital status (*one star*)
  - b) Study controls for other factors (list) \_\_\_\_\_ (*one star*)
  - c) Cohorts are not comparable on the basis of the design or analysis controlled for confounders

### Outcome

- 1) Assessment of outcome
  - a) Independent blind assessment (*one star*)
  - b) Record linkage (*one star*)
  - c) Self report
  - d) No description
  - e) Other
- 2) Was follow-up long enough for outcomes to occur
  - a) Yes (*one star*)
  - b) No
  - c)

Indicate the median duration of follow-up and a brief rationale for the assessment above: \_\_\_\_\_

- 3) Adequacy of follow-up of cohorts
- a) Complete follow up- all subject accounted for (*one star*)
  - b) Subjects lost to follow up unlikely to introduce bias- number lost less than or equal to 20% or description of those lost suggested no different from those followed. (*one star*)
  - c) Follow up rate less than 80% and no description of those lost
  - d) No statement

Thresholds for converting the Newcastle-Ottawa scales to AHRQ standards (good, fair, and poor):

**Good quality:** 3 or 4 stars in selection domain AND 1 or 2 stars in comparability domain AND 2 or 3 stars in outcome/exposure domain

**Fair quality:** 2 stars in selection domain AND 1 or 2 stars in comparability domain AND 2 or 3 stars in outcome/exposure domain

**Poor quality:** 0 or 1 star in selection domain OR 0 stars in comparability domain OR 0 or 1 stars in outcome/exposure domain

### Critical Appraisal Skills Programme or CASP Randomized Clinical Trial

| No | Author       | Year | Section A |     |     | Section B |     |     | Section C |     |     | Section D |     | Appraisal Summary |
|----|--------------|------|-----------|-----|-----|-----------|-----|-----|-----------|-----|-----|-----------|-----|-------------------|
|    |              |      | S1        | S2  | S3  | S1        | S2  | S3  | S1        | S2  | S3  | S1        | S2  |                   |
| 1  | Glanz, JM    | 2020 | Yes       | Yes | Yes | Yes       | Yes | Yes | Yes       | Yes | Yes | Yes       | Yes | Good              |
| 2  | Kwan, B. M.  | 2022 | Yes       | Yes | Yes | Yes       | Yes | Yes | Yes       | No  | Yes | Yes       | Yes | Good              |
| 3  | Suzuki       | 2022 | Yes       | Yes | Yes | Yes       | Yes | Yes | Yes       | Yes | Yes | Yes       | Yes | Good              |
| 4  | Tsang, TK    | 2022 | Yes       | Yes | Yes | No        | No  | No  | Yes       | Yes | No  | Yes       | Yes | Moderate          |
| 5  | Khodadadi AB | 2020 | Yes       | Yes | Yes | Yes       | Yes | Yes | Yes       | No  | Yes | Yes       | Yes | Good              |

CASP Randomised Controlled Trial Standard Checklist:

11 questions to help you make sense of a randomised controlled trial (RCT)

Main issues for consideration: Several aspects need to be considered when appraising a randomised controlled trial:

- Is the basic study design valid for a randomised controlled trial? (Section A)  
Was the study methodologically sound? (Section B) What are the results? (Section C)
- Will the results help locally? (Section D)

The 11 questions in the checklist are designed to help you think about these aspects systematically.

How to use this appraisal tool: The first three questions (Section A) are screening questions about the validity of the basic study design and can be answered quickly. If, in light of your responses to Section A, you think the study design is valid, continue to Section B to assess whether the study was methodologically sound and if it is worth continuing with the appraisal by answering the remaining questions in Sections C and D.

Record 'Yes', 'No' or 'Can't tell' in response to the questions. Prompts below all but one of the questions highlight the issues it is important to consider. Record the reasons for your answers in the space provided. As CASP checklists were designed to be used as educational/teaching tools in a workshop setting, we do not recommend using a scoring system.

About CASP Checklists: The CASP RCT checklist was originally based on JAMA Users' guides to the medical literature 1994 (adapted from Guyatt GH, Sackett DL and Cook DJ), and piloted with healthcare practitioners. This version has been updated taking into account the CONSORT 2010 guideline (<http://www.consort-statement.org/consort-2010>, accessed 16 September 2020).

Citation: CASP recommends using the Harvard style, i.e. *Critical Appraisal Skills Programme (2020). CASP (insert name of checklist i.e. Randomised Controlled Trial) Checklist. [online] Available at: insert URL. Accessed: insert date accessed.*

©CASP this work is licensed under the Creative Commons Attribution – Non-Commercial- Share A like. To view a copy of this licence, visit <https://creativecommons.org/licenses/by-sa/4.0/>

Study and citation: .....

Section A: Is the basic study design valid for a randomised

|                                                                                                                                                                                                                                                                                                                                                                                                                                                               |                                                                                                                                                                                                                                                                                                                                                                                                                                          |                          |    |            |                          |                          |                          |
|---------------------------------------------------------------------------------------------------------------------------------------------------------------------------------------------------------------------------------------------------------------------------------------------------------------------------------------------------------------------------------------------------------------------------------------------------------------|------------------------------------------------------------------------------------------------------------------------------------------------------------------------------------------------------------------------------------------------------------------------------------------------------------------------------------------------------------------------------------------------------------------------------------------|--------------------------|----|------------|--------------------------|--------------------------|--------------------------|
| <p><b>1.</b> Did the study address a clearly focused research question?<br/> <i>CONSIDER:</i><br/> <i>Was the study designed to assess the outcomes of an intervention?</i><br/> <i>Is the research question 'focused' in terms of:</i></p> <ul style="list-style-type: none"> <li>• <i>Population studied</i></li> <li>• <i>Intervention given</i></li> <li>• <i>Comparator chosen</i></li> <li>• <i>Outcomes measured?</i></li> </ul>                       | <table style="width: 100%; border: none;"> <tr> <td style="text-align: center; width: 33%;">Yes</td> <td style="text-align: center; width: 33%;">No</td> <td style="text-align: center; width: 33%;">Can't tell</td> </tr> <tr> <td style="text-align: center;"><input type="checkbox"/></td> <td style="text-align: center;"><input type="checkbox"/></td> <td style="text-align: center;"><input type="checkbox"/></td> </tr> </table> | Yes                      | No | Can't tell | <input type="checkbox"/> | <input type="checkbox"/> | <input type="checkbox"/> |
| Yes                                                                                                                                                                                                                                                                                                                                                                                                                                                           | No                                                                                                                                                                                                                                                                                                                                                                                                                                       | Can't tell               |    |            |                          |                          |                          |
| <input type="checkbox"/>                                                                                                                                                                                                                                                                                                                                                                                                                                      | <input type="checkbox"/>                                                                                                                                                                                                                                                                                                                                                                                                                 | <input type="checkbox"/> |    |            |                          |                          |                          |
| <p><b>2.</b> Was the assignment of participants to interventions randomised? <i>CONSIDER:</i></p> <ul style="list-style-type: none"> <li>• <i>How was randomisation carried out? Was the method appropriate?</i></li> <li>• <i>Was randomisation sufficient to eliminate systematic bias?</i></li> <li>• <i>Was the allocation sequence concealed from investigators and participants?</i></li> </ul>                                                         | <table style="width: 100%; border: none;"> <tr> <td style="text-align: center; width: 33%;">Yes</td> <td style="text-align: center; width: 33%;">No</td> <td style="text-align: center; width: 33%;">Can't tell</td> </tr> <tr> <td style="text-align: center;"><input type="checkbox"/></td> <td style="text-align: center;"><input type="checkbox"/></td> <td style="text-align: center;"><input type="checkbox"/></td> </tr> </table> | Yes                      | No | Can't tell | <input type="checkbox"/> | <input type="checkbox"/> | <input type="checkbox"/> |
| Yes                                                                                                                                                                                                                                                                                                                                                                                                                                                           | No                                                                                                                                                                                                                                                                                                                                                                                                                                       | Can't tell               |    |            |                          |                          |                          |
| <input type="checkbox"/>                                                                                                                                                                                                                                                                                                                                                                                                                                      | <input type="checkbox"/>                                                                                                                                                                                                                                                                                                                                                                                                                 | <input type="checkbox"/> |    |            |                          |                          |                          |
| <p><b>3.</b> Were all participants who entered the study accounted for at its conclusion? <i>CONSIDER:</i></p> <ul style="list-style-type: none"> <li>• <i>Were losses to follow-up and exclusions after randomisation accounted for?</i></li> <li>• <i>Were participants analysed in the study groups to which they were randomised (intention-to-treat analysis)?</i></li> <li>• <i>Was the study stopped early? If so, what was the reason?</i></li> </ul> | <table style="width: 100%; border: none;"> <tr> <td style="text-align: center; width: 33%;">Yes</td> <td style="text-align: center; width: 33%;">No</td> <td style="text-align: center; width: 33%;">Can't tell</td> </tr> <tr> <td style="text-align: center;"><input type="checkbox"/></td> <td style="text-align: center;"><input type="checkbox"/></td> <td style="text-align: center;"><input type="checkbox"/></td> </tr> </table> | Yes                      | No | Can't tell | <input type="checkbox"/> | <input type="checkbox"/> | <input type="checkbox"/> |
| Yes                                                                                                                                                                                                                                                                                                                                                                                                                                                           | No                                                                                                                                                                                                                                                                                                                                                                                                                                       | Can't tell               |    |            |                          |                          |                          |
| <input type="checkbox"/>                                                                                                                                                                                                                                                                                                                                                                                                                                      | <input type="checkbox"/>                                                                                                                                                                                                                                                                                                                                                                                                                 | <input type="checkbox"/> |    |            |                          |                          |                          |

Section B: Was the study methodologically sound?

|                                                                                                                                                                                                                                                                                                                              |                                                                                                                                                                                                                                                                                                                                                                                                                                                                                                                                                                                                                                                                                                                                                                                                                                                    |                          |    |            |                          |                          |                          |                          |                          |                          |                          |                          |                          |
|------------------------------------------------------------------------------------------------------------------------------------------------------------------------------------------------------------------------------------------------------------------------------------------------------------------------------|----------------------------------------------------------------------------------------------------------------------------------------------------------------------------------------------------------------------------------------------------------------------------------------------------------------------------------------------------------------------------------------------------------------------------------------------------------------------------------------------------------------------------------------------------------------------------------------------------------------------------------------------------------------------------------------------------------------------------------------------------------------------------------------------------------------------------------------------------|--------------------------|----|------------|--------------------------|--------------------------|--------------------------|--------------------------|--------------------------|--------------------------|--------------------------|--------------------------|--------------------------|
| <p style="text-align: center;">4.</p> <ul style="list-style-type: none"> <li>• Were the participants 'blind' to intervention they were given?</li> <li>• Were the investigators 'blind' to the intervention they were giving to participants?</li> <li>• Were the people assessing/analysing outcome/s 'blinded'?</li> </ul> | <table style="width: 100%; border: none;"> <tr> <td style="text-align: center; width: 33%;">Yes</td> <td style="text-align: center; width: 33%;">No</td> <td style="text-align: center; width: 33%;">Can't tell</td> </tr> <tr> <td style="text-align: center;"><input type="checkbox"/></td> <td style="text-align: center;"><input type="checkbox"/></td> <td style="text-align: center;"><input type="checkbox"/></td> </tr> <tr> <td style="text-align: center;"><input type="checkbox"/></td> <td style="text-align: center;"><input type="checkbox"/></td> <td style="text-align: center;"><input type="checkbox"/></td> </tr> <tr> <td style="text-align: center;"><input type="checkbox"/></td> <td style="text-align: center;"><input type="checkbox"/></td> <td style="text-align: center;"><input type="checkbox"/></td> </tr> </table> | Yes                      | No | Can't tell | <input type="checkbox"/> | <input type="checkbox"/> | <input type="checkbox"/> | <input type="checkbox"/> | <input type="checkbox"/> | <input type="checkbox"/> | <input type="checkbox"/> | <input type="checkbox"/> | <input type="checkbox"/> |
| Yes                                                                                                                                                                                                                                                                                                                          | No                                                                                                                                                                                                                                                                                                                                                                                                                                                                                                                                                                                                                                                                                                                                                                                                                                                 | Can't tell               |    |            |                          |                          |                          |                          |                          |                          |                          |                          |                          |
| <input type="checkbox"/>                                                                                                                                                                                                                                                                                                     | <input type="checkbox"/>                                                                                                                                                                                                                                                                                                                                                                                                                                                                                                                                                                                                                                                                                                                                                                                                                           | <input type="checkbox"/> |    |            |                          |                          |                          |                          |                          |                          |                          |                          |                          |
| <input type="checkbox"/>                                                                                                                                                                                                                                                                                                     | <input type="checkbox"/>                                                                                                                                                                                                                                                                                                                                                                                                                                                                                                                                                                                                                                                                                                                                                                                                                           | <input type="checkbox"/> |    |            |                          |                          |                          |                          |                          |                          |                          |                          |                          |
| <input type="checkbox"/>                                                                                                                                                                                                                                                                                                     | <input type="checkbox"/>                                                                                                                                                                                                                                                                                                                                                                                                                                                                                                                                                                                                                                                                                                                                                                                                                           | <input type="checkbox"/> |    |            |                          |                          |                          |                          |                          |                          |                          |                          |                          |

|                                                                                                                                                                                                                                                                                                                                                                                           |                                                                                                                               |
|-------------------------------------------------------------------------------------------------------------------------------------------------------------------------------------------------------------------------------------------------------------------------------------------------------------------------------------------------------------------------------------------|-------------------------------------------------------------------------------------------------------------------------------|
| <p>5. Were the study groups similar at the start of the randomised controlled trial?<br/><i>CONSIDER:</i></p> <ul style="list-style-type: none"><li>● <i>Were the baseline characteristics of each study group (e.g. age, sex, socio-economic group) clearly set out?</i></li><li>● <i>Were there any differences between the study groups that could affect the outcome/s?</i></li></ul> | <p>Yes<br/><input type="checkbox"/></p> <p>No<br/><input type="checkbox"/></p> <p>Can't tell<br/><input type="checkbox"/></p> |
|-------------------------------------------------------------------------------------------------------------------------------------------------------------------------------------------------------------------------------------------------------------------------------------------------------------------------------------------------------------------------------------------|-------------------------------------------------------------------------------------------------------------------------------|

|                                                                                                                                                                                                                                                                                                                                                                                                                                                                                                               |                                                                                                                                                                                                                                                                                                                                     |
|---------------------------------------------------------------------------------------------------------------------------------------------------------------------------------------------------------------------------------------------------------------------------------------------------------------------------------------------------------------------------------------------------------------------------------------------------------------------------------------------------------------|-------------------------------------------------------------------------------------------------------------------------------------------------------------------------------------------------------------------------------------------------------------------------------------------------------------------------------------|
| <p><b>6.</b> Apart from the experimental intervention, did each study group receive the same level of care (that is, were they treated equally)?</p> <p style="text-align: center;"><i>CONSIDER:</i></p> <ul style="list-style-type: none"> <li>• Was there a clearly defined study protocol?</li> <li>• If any additional interventions were given (e.g. tests or treatments), were they similar between the study groups?</li> <li>• Were the follow-up intervals the same for each study group?</li> </ul> | <p style="text-align: center;">Yes                      No                      Can't tell</p> <p style="text-align: center;"> <input type="checkbox"/> <input type="checkbox"/>                      <input type="checkbox"/> <input type="checkbox"/>                      <input type="checkbox"/> <input type="checkbox"/> </p> |
|---------------------------------------------------------------------------------------------------------------------------------------------------------------------------------------------------------------------------------------------------------------------------------------------------------------------------------------------------------------------------------------------------------------------------------------------------------------------------------------------------------------|-------------------------------------------------------------------------------------------------------------------------------------------------------------------------------------------------------------------------------------------------------------------------------------------------------------------------------------|

**Section C: What are the results?**

|                                                                                                                                                                                                                                                                                                                                                                                                                                                                                                                                                                                                                                                                                                                                                                                                                    |                                                                                                                                                                                                                                                                                   |
|--------------------------------------------------------------------------------------------------------------------------------------------------------------------------------------------------------------------------------------------------------------------------------------------------------------------------------------------------------------------------------------------------------------------------------------------------------------------------------------------------------------------------------------------------------------------------------------------------------------------------------------------------------------------------------------------------------------------------------------------------------------------------------------------------------------------|-----------------------------------------------------------------------------------------------------------------------------------------------------------------------------------------------------------------------------------------------------------------------------------|
| <p><b>7.</b> Were the effects of intervention reported comprehensively?</p> <p style="text-align: center;"><i>CONSIDER:</i></p> <ul style="list-style-type: none"> <li>• Was a power calculation undertaken?</li> <li>• What outcomes were measured, and were they clearly specified?</li> <li>• How were the results expressed? For binary outcomes, were relative and absolute effects reported?</li> <li>• Were the results reported for each outcome in each study group at each follow-up interval?</li> <li>• Was there any missing or incomplete data?</li> <li>• Was there differential drop-out between the study groups that could affect the results?</li> <li>• Were potential sources of bias identified?</li> <li>• Which statistical tests were used?</li> <li>• Were p values reported?</li> </ul> | <p style="text-align: center;">Yes                      No                      Can't tell</p> <p style="text-align: center;"> <input type="checkbox"/> <input type="checkbox"/>                      <input type="checkbox"/>                      <input type="checkbox"/> </p> |
|--------------------------------------------------------------------------------------------------------------------------------------------------------------------------------------------------------------------------------------------------------------------------------------------------------------------------------------------------------------------------------------------------------------------------------------------------------------------------------------------------------------------------------------------------------------------------------------------------------------------------------------------------------------------------------------------------------------------------------------------------------------------------------------------------------------------|-----------------------------------------------------------------------------------------------------------------------------------------------------------------------------------------------------------------------------------------------------------------------------------|

|                                                                                                                                                                                                                                                        |                                                                                                                                                                                                                                                                                   |
|--------------------------------------------------------------------------------------------------------------------------------------------------------------------------------------------------------------------------------------------------------|-----------------------------------------------------------------------------------------------------------------------------------------------------------------------------------------------------------------------------------------------------------------------------------|
| <p><b>8.</b> Was the precision of the estimate of the intervention or treatment effect reported?</p> <p style="text-align: center;"><i>CONSIDER:</i></p> <ul style="list-style-type: none"> <li>• Were confidence intervals (CIs) reported?</li> </ul> | <p style="text-align: center;">Yes                      No                      Can't tell</p> <p style="text-align: center;"> <input type="checkbox"/> <input type="checkbox"/>                      <input type="checkbox"/>                      <input type="checkbox"/> </p> |
|--------------------------------------------------------------------------------------------------------------------------------------------------------------------------------------------------------------------------------------------------------|-----------------------------------------------------------------------------------------------------------------------------------------------------------------------------------------------------------------------------------------------------------------------------------|

|                                                                                                                                                                                                                                                                                                                                                                                                                                                                                                                                                                  |                                 |                                |                                        |
|------------------------------------------------------------------------------------------------------------------------------------------------------------------------------------------------------------------------------------------------------------------------------------------------------------------------------------------------------------------------------------------------------------------------------------------------------------------------------------------------------------------------------------------------------------------|---------------------------------|--------------------------------|----------------------------------------|
| <p>9. Do the benefits of the experimental intervention outweigh the harms and costs?</p> <p style="text-align: center;"><i>CONSIDER:</i></p> <ul style="list-style-type: none"><li>● <i>What was the size of the intervention or treatment effect?</i></li><li>● <i>Were harms or unintended effects reported for each study group?</i></li><li>● <i>Was a cost-effectiveness analysis undertaken? (Cost-effectiveness analysis allows a comparison to be made between different interventions used in the care of the same condition or problem.)</i></li></ul> | Yes<br><input type="checkbox"/> | No<br><input type="checkbox"/> | Can't tell<br><input type="checkbox"/> |
|------------------------------------------------------------------------------------------------------------------------------------------------------------------------------------------------------------------------------------------------------------------------------------------------------------------------------------------------------------------------------------------------------------------------------------------------------------------------------------------------------------------------------------------------------------------|---------------------------------|--------------------------------|----------------------------------------|



Section D: Will the results help locally?

|                                                                                                                                                                                                                                                                                                                                                                                                                                                                                                                                                                                                                                                                                            |                                                                                                                                                                                                                                                                                   |
|--------------------------------------------------------------------------------------------------------------------------------------------------------------------------------------------------------------------------------------------------------------------------------------------------------------------------------------------------------------------------------------------------------------------------------------------------------------------------------------------------------------------------------------------------------------------------------------------------------------------------------------------------------------------------------------------|-----------------------------------------------------------------------------------------------------------------------------------------------------------------------------------------------------------------------------------------------------------------------------------|
| <p><b>10.</b> Can the results be applied to your local population/in your context?</p> <p style="text-align: center;"><i>CONSIDER:</i></p> <ul style="list-style-type: none"> <li>• <i>Are the study participants similar to the people in your care?</i></li> <li>• <i>Would any differences between your population and the study participants alter the outcomes reported in the study?</i></li> <li>• <i>Are the outcomes important to your population?</i></li> <li>• <i>Are there any outcomes you would have wanted information on that have not been studied or reported?</i></li> <li>• <i>Are there any limitations of the study that would affect your decision?</i></li> </ul> | <p style="text-align: center;">Yes                      No                      Can't tell</p> <p style="text-align: center;"> <input type="checkbox"/> <input type="checkbox"/>                      <input type="checkbox"/>                      <input type="checkbox"/> </p> |
| <p><b>11.</b> Would the experimental intervention provide greater value to the people in your care than any of the existing interventions?</p> <p style="text-align: center;"><i>CONSIDER:</i></p> <ul style="list-style-type: none"> <li>• <i>What resources are needed to introduce this intervention taking into account time, finances, and skills development or training needs?</i></li> <li>• <i>Are you able to disinvest resources in one or more existing interventions in order to be able to re-invest in the new intervention?</i></li> </ul>                                                                                                                                 | <p style="text-align: center;">Yes                      No                      Can't tell</p> <p style="text-align: center;"> <input type="checkbox"/> <input type="checkbox"/>                      <input type="checkbox"/>                      <input type="checkbox"/> </p> |

*APPRAISAL SUMMARY: Record key points from your critical appraisal in this box. What is your conclusion about the paper? Would you use it to change your practice or to recommend changes to care/interventions used by your organisation? Could you judiciously implement this intervention without delay?*
