# Supplementary material for: Prevalence of caregiver hesitancy for vaccinations in children and its associated factors: A systematic review and meta-analysis
Source: PubMed Central journal article supplement (PMC11500859; doi:10.1371/journal.pone.0302379), 2024-10-24
Supplement: pone.0302379.s009.pdf [file pone.0302379.s009.pdf]

**S5 Table: Prevalence of vaccine hesitancy among parents across the region**

| No | Author                | Year | Region | Total respondent | Hesitancy | Prevalence* | Lower CI | Upper CI | Vaccine    |
|----|-----------------------|------|--------|------------------|-----------|-------------|----------|----------|------------|
| 1  | Kyei-Arthur F         | 2022 | Africa | 415              | 110       | 0.267       | 0.223198 | 0.310309 | Covid-19   |
| 2  | Balogun FM            | 2022 | Africa | 678              | 22        | 0.032       | 0.020445 | 0.048717 | HPV        |
| 3  | Kolek CO              | 2022 | Africa | 341              | 34        | 0.1         | 0.070043 | 0.136539 | HPV        |
| 4  | Kamya C               | 2022 | Africa | 590              | 6         | 0.01        | 0.003741 | 0.022003 | Mix        |
| 5  | Darebo TD             | 2022 | Africa | 657              | 74        | 0.113       | 0.089898 | 0.139958 | Mix        |
| 6  | Abor J                | 2022 | Africa | 420              | 55        | 0.13        | 0.100197 | 0.16702  | Mix        |
| 7  | Griffith BC           | 2022 | Africa | 999              | 151       | 0.151       | 0.129492 | 0.174888 | MMR        |
| 8  | Sabahelzain MM        | 2022 | Africa | 500              | 60        | 0.12        | 0.0928   | 0.1518   | MMR        |
| 9  | Tefera YA             | 2018 | Africa | 540              | 292       | 0.54        | 0.4977   | 0.5834   | Not stated |
| 10 | Immurana M            | 2021 | Africa | 3004             | 162       | 0.054       | 0.046122 | 0.062616 | Others     |
| 11 | Obute JA              | 2007 | Africa | 422              | 31        | 0.07        | 0.0505   | 0.1027   | Others     |
| 12 | Mohammed A            | 2014 | Africa | 360              | 211       | 0.56        | 0.5333   | 0.6375   | Others     |
| 13 | Asmare G              | 2022 | Africa | 406              | 274       | 0.677       | 0.62693  | 0.720252 | Others     |
| 14 | Cockcroft, A          | 2014 | Africa | 2836             | 458       | 0.161       | 0.14812  | 0.175562 | MMR        |
| 15 | Helman, CG            | 2004 | Africa | 60               | 13        | 0.21        | 0.120    | 0.341    | Mix        |
| 16 | Powelson, J           | 2022 | Africa | 32               | 13        | 0.40        | 0.236    | 0.593    | Mix        |
| 17 | Milondzo T. et al.,   | 2022 | Africa | 320              | 196       | 0.61        | 0.556    | 0.666    | HPV        |
| 18 | Sulaiman S.K. et al., | 2023 | Africa | 3377             | 1010      | 0.29        | 0.283    | 0.314    | Others     |
| 19 | Abuhammad S           | 2022 | Asia   | 1078             | 241       | 0.224       | 0.199009 | 0.249634 | Covid-19   |
| 20 | Aedh AI               | 2022 | Asia   | 464              | 72        | 0.155       | 0.123437 | 0.191379 | Covid-19   |
| 21 | Akgün Ö               | 2022 | Asia   | 540              | 67        | 0.12        | 0.0975   | 0.1549   | Covid-19   |
| 22 | Aldakhil H            | 2021 | Asia   | 270              | 119       | 0.44        | 0.380609 | 0.502187 | Covid-19   |
| 23 | Ali M                 | 2022 | Asia   | 2633             | 170       | 0.0646      | 0.055477 | 0.074636 | Covid-19   |
| 24 | Al-Iede M             | 2022 | Asia   | 2628             | 1216      | 0.46        | 0.443506 | 0.481995 | Covid-19   |
| 25 | Al-Khlaiwi T          | 2022 | Asia   | 1304             | 382       | 0.293       | 0.268349 | 0.318477 | Covid-19   |
| 26 | Almansour A           | 2022 | Asia   | 500              | 120       | 0.24        | 0.203197 | 0.27991  | Covid-19   |
| 27 | Almusbah Z            | 2021 | Asia   | 1000             | 346       | 0.346       | 0.316507 | 0.376403 | Covid-19   |
| 28 | Al-Qahtani AM         | 2022 | Asia   | 528              | 203       | 0.3844      | 0.342776 | 0.427464 | Covid-19   |
| 29 | Al-Qerem W            | 2022 | Asia   | 491              | 175       | 0.356       | 0.31401  | 0.400562 | Covid-19   |
| 30 | Al-Qerem W            | 2022 | Asia   | 819              | 396       | 0.484       | 0.448793 | 0.518359 | Covid-19   |
| 31 | Altulaihi BA          | 2021 | Asia   | 333              | 90        | 0.27        | 0.223301 | 0.321379 | Covid-19   |
| 32 | Bord S                | 2022 | Asia   | 581              | 62        | 0.107       | 0.082799 | 0.134708 | Covid-19   |
| 33 | Çağ Y                 | 2022 | Asia   | 1440             | 26        | 0.018       | 0.0118   | 0.0263   | Covid-19   |
| 34 | Choi UI               | 2022 | Asia   | 1217             | 292       | 0.24        | 0.216183 | 0.264949 | Covid-19   |
| 35 | Duong AH              | 2022 | Asia   | 5357             | 176       | 0.033       | 0.028243 | 0.037983 | Covid-19   |
| 36 | ElSayed DA            | 2022 | Asia   | 223              | 125       | 0.5625      | 0.492717 | 0.626728 | Covid-19   |
| 37 | Hou Z                 | 2022 | Asia   | 3897             | 386       | 0.099       | 0.089846 | 0.108861 | Covid-19   |
| 38 | Huang LL              | 2022 | Asia   | 514              | 37        | 0.072       | 0.051187 | 0.097858 | Covid-19   |
| 39 | Khan YH               | 2022 | Asia   | 444              | 95        | 0.214       | 0.176706 | 0.255082 | Covid-19   |
| 40 | Kharaba Z             | 2022 | Asia   | 1049             | 307       | 0.293       | 0.265264 | 0.321224 | Covid-19   |
| 41 | Khataatbeh M          | 2022 | Asia   | 3744             | 1361      | 0.364       | 0.348085 | 0.379158 | Covid-19   |
| 42 | Kocamaz EB            | 2022 | Asia   | 384              | 103       | 0.268       | 0.224551 | 0.315522 | Covid-19   |
| 43 | Lau EY                | 2022 | Asia   | 11141            | 9425      | 0.846       | 0.839136 | 0.852631 | Covid-19   |
| 44 | Lee M                 | 2022 | Asia   | 113450           | 43174     | 0.381       | 0.377729 | 0.383388 | Covid-19   |
| 45 | Li T                  | 2022 | Asia   | 3342             | 66        | 0.02        | 0.015306 | 0.025057 | Covid-19   |
| 46 | Lu L                  | 2022 | Asia   | 868              | 208       | 0.23        | 0.211582 | 0.269461 | Covid-19   |
| 47 | Ma Y                  | 2022 | Asia   | 424              | 165       | 0.389       | 0.34248  | 0.437381 | Covid-19   |
| 48 | Mohammed AH           | 2022 | Asia   | 1154             | 508       | 0.44        | 0.411317 | 0.469404 | Covid-19   |
| 49 | Mohan R               | 2022 | Asia   | 204              | 31        | 0.15        | 0.105645 | 0.208709 | Covid-19   |
| 50 | Morozov NG            | 2022 | Asia   | 1514             | 848       | 0.56        | 0.540927 | 0.586794 | Covid-19   |
| 51 | Ng DL                 | 2022 | Asia   | 3528             | 486       | 0.138       | 0.126545 | 0.14957  | Covid-19   |
| 52 | Padhi BK              | 2021 | Asia   | 770              | 164       | 0.213       | 0.184564 | 0.243627 | Covid-19   |
| 53 | Parinyarux P          | 2022 | Asia   | 488              | 45        | 0.092       | 0.068057 | 0.121441 | Covid-19   |
| 54 | Qin C                 | 2022 | Asia   | 1724             | 199       | 0.1154      | 0.10072  | 0.131461 | Covid-19   |
| 55 | Reagu S               | 2022 | Asia   | 6882             | 2023      | 0.294       | 0.283208 | 0.304877 | Covid-19   |
| 56 | Samannodi M           | 2021 | Asia   | 581              | 22        | 0.038       | 0.02388  | 0.05677  | Covid-19   |
| 57 | Samudyatha UC         | 2022 | Asia   | 272              | 18        | 0.066       | 0.039689 | 0.102573 | Covid-19   |
| 58 | Savitsky B            | 2022 | Asia   | 138              | 37        | 0.266       | 0.196326 | 0.350136 | Covid-19   |
| 59 | Shati AA              | 2022 | Asia   | 1463             | 187       | 0.128       | 0.111129 | 0.14602  | Covid-19   |
| 60 | Shmueli L             | 2021 | Asia   | 1012             | 233       | 0.23        | 0.204621 | 0.257433 | Covid-19   |
| 61 | Swed S                | 2022 | Asia   | 283              | 127       | 0.449       | 0.389855 | 0.508756 | Covid-19   |
| 62 | Tung TH               | 2022 | Asia   | 1788             | 606       | 0.339       | 0.316986 | 0.361397 | Covid-19   |
| 63 | Wan X                 | 2021 | Asia   | 468              | 62        | 0.1325      | 0.103101 | 0.166593 | Covid-19   |
| 64 | Wang L                | 2022 | Asia   | 2019             | 179       | 0.089       | 0.076616 | 0.101909 | Covid-19   |
| 65 | Wang Q                | 2022 | Asia   | 5102             | 447       | 0.08        | 0.079994 | 0.095707 | Covid-19   |
| 66 | Wong LP               | 2022 | Asia   | 1003             | 46        | 0.046       | 0.033702 | 0.060583 | Covid-19   |
| 67 | Wong WH               | 2022 | Asia   | 545              | 183       | 0.34        | 0.296197 | 0.377155 | Covid-19   |
| 68 | Yang J                | 2022 | Asia   | 12872            | 566       | 0.044       | 0.040494 | 0.047657 | Covid-19   |

|     |                    |      |      |        |       |        |          |          |            |
|-----|--------------------|------|------|--------|-------|--------|----------|----------|------------|
| 69  | Yigit M            | 2021 | Asia | 428    | 344   | 0.804  | 0.762894 | 0.840323 | Covid-19   |
| 70  | Zhang Z            | 2023 | Asia | 1788   | 948   | 0.53   | 0.5068   | 0.553549 | Covid-19   |
| 71  | Zheng M            | 2022 | Asia | 2624   | 131   | 0.05   | 0.041907 | 0.058963 | Covid-19   |
| 72  | Zhou M             | 2022 | Asia | 1602   | 203   | 0.127  | 0.11081  | 0.144005 | Covid-19   |
| 73  | Zhou Y             | 2021 | Asia | 1071   | 914   | 0.853  | 0.825274 | 0.877392 | Covid-19   |
| 74  | Akca G             | 2022 | Asia | 330    | 108   | 0.327  | 0.276885 | 0.380795 | HPV        |
| 75  | Choi J             | 2022 | Asia | 906    | 256   | 0.283  | 0.253438 | 0.313105 | HPV        |
| 76  | Frianto D          | 2022 | Asia | 286    | 200   | 0.699  | 0.642534 | 0.751882 | HPV        |
| 77  | Pearl CA           | 2022 | Asia | 45     | 33    | 0.73   | 0.580553 | 0.853959 | HPV        |
| 78  | Huang Y            | 2020 | Asia | 1125   | 1,068 | 0.95   | 0.9349   | 0.961403 | HPV        |
| 79  | Akis S             | 2011 | Asia | 611    | 386   | 0.63   | 0.5921   | 0.6701   | Influenza  |
| 80  | Alabbad AA         | 2018 | Asia | 100    | 17    | 0.17   | 0.1023   | 0.2582   | Influenza  |
| 81  | Alenazi KA         | 2022 | Asia | 539    | 18    | 0.033  | 0.01991  | 0.052267 | Influenza  |
| 82  | Alolayan A         | 2019 | Asia | 399    | 21    | 0.053  | 0.0329   | 0.07933  | Influenza  |
| 83  | AlOmran HI         | 2022 | Asia | 510    | 382   | 0.75   | 0.709031 | 0.786093 | Influenza  |
| 84  | Fan J              | 2022 | Asia | 5016   | 420   | 0.0837 | 0.076211 | 0.091742 | Influenza  |
| 85  | Hussein YH         | 2022 | Asia | 287    | 179   | 0.624  | 0.564856 | 0.679948 | Influenza  |
| 86  | Lai X              | 2022 | Asia | 6668   | 360   | 0.054  | 0.048686 | 0.059687 | Influenza  |
| 87  | Liao Q             | 2022 | Asia | 291    | 84    | 0.29   | 0.237267 | 0.344415 | Influenza  |
| 88  | Salawati E         | 2021 | Asia | 2501   | 378   | 0.15   | 0.137317 | 0.165785 | Influenza  |
| 89  | Zakhour R          | 2021 | Asia | 306    | 214   | 0.7    | 0.6446   | 0.750205 | Influenza  |
| 90  | Zhang H            | 2022 | Asia | 7323   | 3713  | 0.507  | 0.495513 | 0.518547 | Influenza  |
| 91  | Abu-Rish EY        | 2016 | Asia | 1107   | 362   | 0.33   | 0.2994   | 0.3555   | Mix        |
| 92  | Alsubaie SS        | 2019 | Asia | 500    | 100   | 0.2    | 0.1658   | 0.2378   | Mix        |
| 93  | Chan HK            | 2018 | Asia | 117429 | 705   | 0.0058 | 0.0054   | 0.0063   | Mix        |
| 94  | Chang K            | 2019 | Asia | 129    | 34    | 0.26   | 0.1899   | 0.34837  | Mix        |
| 95  | Choi SH            | 2021 | Asia | 226    | 81    | 0.36   | 0.2959   | 0.4247   | Mix        |
| 96  | Dasgupta P         | 2018 | Asia | 194    | 161   | 0.83   | 0.76949  | 0.879922 | Mix        |
| 97  | Han K              | 2022 | Asia | 2081   | 1173  | 0.5637 | 0.542046 | 0.585117 | Mix        |
| 98  | Hijazi R           | 2022 | Asia | 18     | 11    | 0.61   | 0.357451 | 0.827014 | Mix        |
| 99  | Khaliq A           | 2017 | Asia | 484    | 153   | 0.32   | 0.2749   | 0.3596   | Mix        |
| 100 | Khaliq A           | 2022 | Asia | 230    | 141   | 0.613  | 0.546795 | 0.676338 | Mix        |
| 101 | Özer M             | 2022 | Asia | 78     | 22    | 0.225  | 0.185938 | 0.395331 | Mix        |
| 102 | Shaipuzaman NA     | 2022 | Asia | 97     | 4     | 0.041  | 0.011348 | 0.102228 | Mix        |
| 103 | Tal O              | 2021 | Asia | 1010   | 36    | 0.036  | 0.025087 | 0.049006 | Mix        |
| 104 | Temsah MH          | 2021 | Asia | 3167   | 1013  | 0.32   | 0.303631 | 0.336424 | Mix        |
| 105 | Tianshuo Z         | 2022 | Asia | 199    | 5     | 0.025  | 0.008208 | 0.057658 | Mix        |
| 106 | Wu L               | 2022 | Asia | 1691   | 515   | 0.304  | 0.282678 | 0.32711  | Mix        |
| 107 | Yalçin SS          | 2022 | Asia | 23756  | 1401  | 0.059  | 0.055967 | 0.061996 | Mix        |
| 108 | Ashkenazi S        | 2020 | Asia | 399    | 92    | 0.23   | 0.1901   | 0.275076 | MMR        |
| 109 | Aharony N          | 2017 | Asia | 210    | 101   | 0.48   | 0.4117   | 0.5508   | Not stated |
| 110 | Akhmetzhanova Z    | 2020 | Asia | 442    | 155   | 0.35   | 0.3062   | 0.3972   | Not stated |
| 111 | AlGoraini YM       | 2022 | Asia | 384    | 57    | 0.15   | 0.1144   | 0.188    | Not stated |
| 112 | Alsuwaidi AR       | 2020 | Asia | 300    | 36    | 0.12   | 0.0855   | 0.162244 | Not stated |
| 113 | Çağ Y              | 2022 | Asia | 1184   | 238   | 0.201  | 0.178529 | 0.224993 | Not stated |
| 114 | Azizi FS           | 2017 | Asia | 545    | 17    | 0.032  | 0.0201   | 0.049    | Not stated |
| 115 | Gunes NA           | 2020 | Asia | 614    | 18    | 0.029  | 0.0175   | 0.045937 | Not stated |
| 116 | Hu Y               | 2019 | Asia | 770    | 92    | 0.12   | 0.0974   | 0.144508 | Not stated |
| 117 | Kalok A            | 2020 | Asia | 1081   | 86    | 0.08   | 0.0641   | 0.09732  | Not stated |
| 118 | Noyman-Veksler G   | 2020 | Asia | 555    | 115   | 0.21   | 0.1742   | 0.2433   | Not stated |
| 119 | Yörük S            | 2021 | Asia | 370    | 18    | 0.048  | 0.0291   | 0.0758   | Not stated |
| 120 | Ali HYM            | 2004 | Asia | 254    | 41    | 0.16   | 0.1184   | 0.2125   | Others     |
| 121 | Al-Iede M          | 2022 | Asia | 720    | 222   | 0.308  | 0.274751 | 0.343495 | Others     |
| 122 | Gesser-Edelsburg A | 2016 | Asia | 196    | 25    | 0.13   | 0.0843   | 0.182509 | Others     |
| 123 | Khan TM            | 2016 | Asia | 1775   | 293   | 0.17   | 0.1481   | 0.1832   | Others     |
| 124 | Khowaja AR         | 2012 | Asia | 1017   | 712   | 0.7    | 0.6800   | 0.7192   | Others     |
| 125 | Li L               | 2022 | Asia | 1254   | 101   | 0.0805 | 0.066079 | 0.097006 | Others     |
| 126 | Qi L               | 2019 | Asia | 1080   | 482   | 0.45   | 0.4164   | 0.4765   | Others     |
| 127 | Imanishi Y         | 2022 | Asia | 161    | 60    | 0.37   | 0.297    | 0.542    | HPV        |
| 128 | Yagi               | 2018 | Asia | 4260   | 3843  | 0.90   | 0.892    | 0.910    | HPV        |
| 129 | Hanley S           | 2012 | Asia | 862    | 64    | 0.07   | 0.057    | 0.093    | HPV        |
| 130 | Hanley             | 2014 | Asia | 27     | 2     | 0.074  | 0.009    | 0.242    | HPV        |
| 131 | Egawa-Takata       | 2015 | Asia | 2828   | 176   | 0.06   | 0.053    | 0.717    | HPV        |
| 132 | Shuto              | 2021 | Asia | 1646   | 643   | 0.39   | 0.366    | 0.414    | HPV        |
| 133 | Kobayashi          | 2020 | Asia | 242    | 111   | 0.46   | 0.394    | 0.523    | HPV        |
| 134 | Miyoshi            | 2020 | Asia | 1648   | 626   | 0.37   | 0.356    | 0.403    | HPV        |
| 135 | Egawa-Takata       | 2020 | Asia | 450    | 233   | 0.518  | 0.470    | 0.564    | HPV        |
| 136 | Ugumori            | 2021 | Asia | 59     | 1     | 0.02   | 0.0004   | 0.090    | HPV        |
| 137 | Suzuki             | 2022 | Asia | 2175   | 1984  | 0.912  | 0.899    | 0.923    | HPV        |
| 138 | Çelik, M.Y.        | 2021 | Asia | 274    | 128   | 0.467  | 0.406    | 0.528    | Covid-19   |
| 139 | Wang, Z.           | 2021 | Asia | 1332   | 739   | 0.555  | 0.527    | 0.581    | Covid-19   |

|     |                            |      |        |       |      |        |          |          |            |
|-----|----------------------------|------|--------|-------|------|--------|----------|----------|------------|
| 140 | Altulahi, N.               | 2021 | Asia   | 3038  | 1446 | 0.476  | 0.458    | 0.493    | Covid-19   |
| 141 | Feng, H                    | 2021 | Asia   | 3703  | 596  | 0.161  | 0.149    | 0.173    | Covid-19   |
| 142 | Al-Nafeesah AS             | 2021 | Asia   | 1143  | 297  | 0.26   | 0.234    | 0.286    | Mix        |
| 143 | Hou, Z.                    | 2021 | Asia   | 1655  | 158  | 0.09   | 0.081    | 0.110    | Mix        |
| 144 | Zhou T                     | 2023 | Asia   | 2630  | 205  | 0.078  | 0.067    | 0.888    | Covid-19   |
| 145 | Zhang H                    | 2023 | Asia   | 346   | 39   | 0.11   | 0.081    | 0.150    | Covid-19   |
| 146 | Zhang K                    | 2023 | Asia   | 437   | 38   | 0.08   | 0.062    | 0.117    | Covid-19   |
| 147 | Ahmed, N                   | 2023 | Asia   | 244   | 90   | 0.369  | 0.308    | 0.432    | Mix        |
| 148 | Bourguiba, A               | 2023 | Asia   | 437   | 225  | 0.515  | 0.466    | 0.562    | Covid-19   |
| 149 | Al-Qerem, W                | 2023 | Asia   | 667   | 403  | 0.604  | 0.565    | 0.641    | Influenza  |
| 150 | Ni, Y-H.                   | 2023 | Asia   | 1051  | 403  | 0.383  | 0.353    | 0.413    | Others     |
| 151 | Alaamri, O.                | 2022 | Asia   | 2030  | 213  | 0.10   | 0.091    | 0.119    | Not stated |
| 152 | Alharbi, I.                | 2022 | Asia   | 334   | 18   | 0.054  | 0.0322   | 0.083    | Influenza  |
| 153 | Xie, H.                    | 2023 | Asia   | 1431  | 216  | 0.151  | 0.132    | 0.170    | HPV        |
| 154 | Alhuzaimi, AN              | 2023 | Asia   | 873   | 179  | 0.20   | 0.178    | 0.233    | Covid-19   |
| 155 | Alkhalas, SH               | 2022 | Asia   | 343   | 52   | 0.152  | 0.115    | 0.194    | HPV        |
| 156 | Almuqbil, M.               | 2023 | Asia   | 699   | 174  | 0.248  | 0.217    | 0.282    | Covid-19   |
| 157 | Topaktas B.                | 2022 | Asia   | 338   | 15   | 0.044  | 0.025    | 0.072    | Mix        |
| 158 | Ashour, HA                 | 2023 | Asia   | 293   | 183  | 0.62   | 0.566    | 0.680    | Covid-19   |
| 159 | Sobierajski, T.            | 2023 | Asia   | 360   | 15   | 0.04   | 0.023    | 0.067    | HPV        |
| 160 | Wang, X.                   | 2021 | Asia   | 941   | 471  | 0.501  | 0.468    | 0.532    | Covid-19   |
| 161 | Babi A.                    | 2023 | Asia   | 141   | 63   | 0.44   | 0.363    | 0.532    | HPV        |
| 162 | Sahoo S. S.                | 2023 | Asia   | 196   | 10   | 0.05   | 0.024    | 0.091    | Mix        |
| 163 | Chawanpaiboon S.           | 2023 | Asia   | 400   | 28   | 0.07   | 0.047    | 0.099    | Covid-19   |
| 164 | Tsai, C-S. et al           | 2022 | Asia   | 252   | 4    | 0.01   | 0.004    | 0.040    | Covid-19   |
| 165 | Cho, HK. et at             | 2022 | Asia   | 1019  | 444  | 0.43   | 0.405    | 0.466    | Covid-19   |
| 166 | Choi, J.                   | 2023 | Asia   | 10    | 6    | 0.6    | 0.262    | 0.878    | HPV        |
| 167 | Yoda, T. et al.,           | 2021 | Asia   | 1100  | 158  | 0.14   | 0.123    | 0.165    | Covid-19   |
| 168 | Dao, T.L. et al.,          | 2023 | Asia   | 602   | 104  | 0.172  | 0.143    | 0.205    | Covid-19   |
| 169 | Deng, JS et al             | 2023 | Asia   | 384   | 246  | 0.68   | 0.638    | 0.733    | Covid-19   |
| 170 | Du, Y et al                | 2022 | Asia   | 1110  | 121  | 0.10   | 0.091    | 0.128    | Others     |
| 171 | Fakhruddin TM. et al       | 2023 | Asia   | 375   | 189  | 0.50   | 0.452    | 0.555    | Not stated |
| 172 | Ghazy, RM et al            | 2023 | Asia   | 321   | 205  | 0.63   | 0.583    | 0.691    | Covid-19   |
| 173 | Al Yamani, Z.J. et al.,    | 2022 | Asia   | 375   | 262  | 0.699  | 0.649    | 0.744    | Mix        |
| 174 | Mohd Zin Z. et al          | 2022 | Asia   | 27    | 24   | 0.88   | 0.708    | 0.976    | Mix        |
| 175 | Maneesriwongul W. et al.,  | 2023 | Asia   | 455   | 62   | 0.13   | 0.106    | 0.171    | Covid-19   |
| 176 | Khatrawi, EM and Sayed, AA | 2023 | Asia   | 344   | 73   | 0.21   | 0.17     | 0.259    | Covid-19   |
| 177 | Khodoruth, MAS et al       | 2023 | Asia   | 433   | 158  | 0.36   | 0.319    | 0.412    | Covid-19   |
| 178 | Horiuchi, S. et al.,       | 2021 | Asia   | 1200  | 424  | 0.35   | 0.326    | 0.381    | Covid-19   |
| 179 | Aljamaan, F. et al.,       | 2022 | Asia   | 1340  | 911  | 0.68   | 0.654    | 0.704    | Covid-19   |
| 180 | Yulan Lin et al            | 2021 | Asia   | 2026  | 1573 | 0.77   | 0.757    | 0.794    | Covid-19   |
| 181 | Lu X                       | 2021 | Asia   | 13451 | 981  | 0.073  | 0.068    | 0.077    | Covid-19   |
| 182 | Wagner A                   | 2022 | Europe | 1318  | 54   | 0.041  | 0.030926 | 0.053123 | Covid-19   |
| 183 | Bianco A                   | 2022 | Europe | 394   | 49   | 0.124  | 0.09344  | 0.161067 | Covid-19   |
| 184 | Ceannt R                   | 2022 | Europe | 482   | 86   | 0.178  | 0.145267 | 0.215583 | Covid-19   |
| 185 | Krakowczyk JB              | 2022 | Europe | 2405  | 464  | 0.193  | 0.177334 | 0.20928  | Covid-19   |
| 186 | Manolescu LS               | 2022 | Europe | 1645  | 334  | 0.203  | 0.18384  | 0.223305 | Covid-19   |
| 187 | Iannello P                 | 2022 | Europe | 415   | 86   | 0.207  | 0.169235 | 0.249456 | Covid-19   |
| 188 | Lecce M                    | 2022 | Europe | 604   | 138  | 0.23   | 0.195562 | 0.264072 | Covid-19   |
| 189 | Miraglia del Giudice G     | 2022 | Europe | 430   | 104  | 0.24   | 0.20212  | 0.285194 | Covid-19   |
| 190 | Babicki M                  | 2021 | Europe | 4432  | 1142 | 0.258  | 0.244846 | 0.270817 | Covid-19   |
| 191 | Musa S                     | 2021 | Europe | 4023  | 1045 | 0.2597 | 0.24626  | 0.273602 | Covid-19   |
| 192 | Skirrow H                  | 2022 | Europe | 1404  | 176  | 0.125  | 0.108478 | 0.143819 | Covid-19   |
| 193 | Mărcău FC                  | 2022 | Europe | 581   | 188  | 0.323  | 0.285658 | 0.363308 | Covid-19   |
| 194 | Galanis P                  | 2021 | Europe | 813   | 272  | 0.335  | 0.302165 | 0.368167 | Covid-19   |
| 195 | Napoli A                   | 2022 | Europe | 358   | 155  | 0.433  | 0.38098  | 0.48606  | Covid-19   |
| 196 | Steletou E                 | 2022 | Europe | 439   | 199  | 0.453  | 0.406048 | 0.501191 | Covid-19   |
| 197 | Miliordos K                | 2022 | Europe | 366   | 190  | 0.519  | 0.466596 | 0.571343 | Covid-19   |
| 198 | Muluye M                   | 2022 | Europe | 874   | 482  | 0.551  | 0.517816 | 0.58481  | Covid-19   |
| 199 | Galanis P                  | 2022 | Europe | 813   | 593  | 0.729  | 0.697448 | 0.759673 | Covid-19   |
| 200 | Fedele F                   | 2021 | Europe | 640   | 467  | 0.73   | 0.69349  | 0.76375  | Covid-19   |
| 201 | Koźlarek M                 | 2022 | Europe | 402   | 101  | 0.25   | 0.209568 | 0.296625 | Covid-19   |
| 202 | Taylor J                   | 2022 | Europe | 138   | 5    | 0.036  | 0.011867 | 0.082526 | HPV        |
| 203 | Kornfeld J                 | 2013 | Europe | 224   | 13   | 0.06   | 0.03126  | 0.097198 | HPV        |
| 204 | Runngren E                 | 2021 | Europe | 20    | 2    | 0.1    | 0.012349 | 0.316983 | HPV        |
| 205 | Hontelez JA                | 2010 | Europe | 203   | 32   | 0.16   | 0.11039  | 0.215185 | HPV        |
| 206 | Naoum P                    | 2022 | Europe | 1000  | 328  | 0.328  | 0.298944 | 0.358073 | HPV        |
| 207 | Navarro-Illana P           | 2015 | Europe | 833   | 192  | 0.23   | 0.202287 | 0.260618 | HPV        |
| 208 | Della Polla G              | 2020 | Europe | 435   | 144  | 0.33   | 0.286943 | 0.377443 | HPV        |
| 209 | Di Giuseppe G              | 2022 | Europe | 574   | 181  | 0.315  | 0.277483 | 0.355093 | Influenza  |

|     |                           |      |               |        |       |        |          |          |            |
|-----|---------------------------|------|---------------|--------|-------|--------|----------|----------|------------|
| 210 | Gorman DR                 | 2020 | Europe        | 128    | 54    | 0.42   | 0.335144 | 0.512305 | Influenza  |
| 211 | Bielecki K                | 2020 | Europe        | 65     | 5     | 0.07   | 0.0327   | 0.1293   | Influenza  |
| 212 | Prospero E                | 2019 | Europe        | 366    | 358   | 0.95   | 0.9224   | 0.9694   | Influenza  |
| 213 | Miron VD                  | 2022 | Europe        | 2550   | 27    | 0.01   | 0.006989 | 0.015368 | Mix        |
| 214 | Skitarelić N              | 2022 | Europe        | 300    | 5     | 0.0166 | 0.005433 | 0.0384   | Mix        |
| 215 | Harmsen IA                | 2013 | Europe        | 592    | 12    | 0.02   | 0.010517 | 0.03514  | Mix        |
| 216 | Byström E                 | 2020 | Europe        | 825    | 17    | 0.02   | 0.012049 | 0.032788 | Mix        |
| 217 | Đaňová J                  | 2015 | Europe        | 480    | 10    | 0.02   | 0.010035 | 0.037979 | Mix        |
| 218 | Durmaz N                  | 2022 | Mix           | 1087   | 38    | 0.0356 | 0.024855 | 0.04767  | Mix        |
| 219 | Fonseca IC                | 2021 | Europe        | 886    | 32    | 0.036  | 0.024833 | 0.050607 | Mix        |
| 220 | Whelan SO                 | 2021 | Europe        | 436    | 22    | 0.05   | 0.031889 | 0.075401 | Mix        |
| 221 | Lewandowska A             | 2020 | Europe        | 1257   | 136   | 0.108  | 0.091556 | 0.126689 | Mix        |
| 222 | Napolitano F              | 2018 | Europe        | 437    | 79    | 0.18   | 0.145818 | 0.220127 | Mix        |
| 223 | Van Hoecke AL             | 2022 | Europe        | 538    | 139   | 0.258  | 0.22186  | 0.297547 | Mix        |
| 224 | Miko D                    | 2019 | Europe        | 452    | 190   | 0.43   | 0.3744   | 0.4674   | Mix        |
| 225 | Caso D                    | 2021 | Europe        | 447    | 223   | 0.5    | 0.451551 | 0.546226 | Mix        |
| 226 | Buonsenso D               | 2022 | Europe        | 121    | 15    | 0.12   | 0.071073 | 0.196211 | Mix        |
| 227 | Herdea V                  | 2022 | Europe        | 5640   | 448   | 0.078  | 0.072506 | 0.08679  | Mix        |
| 228 | Tho SL                    | 2015 | Europe        | 1270   | 599   | 0.47   | 0.443898 | 0.499541 | Mix        |
| 229 | Anello P                  | 2017 | Europe        | 86255  | 1647  | 0.0191 | 0.018192 | 0.02003  | MMR        |
| 230 | Campbell H                | 2017 | Europe        | 1792   | 36    | 0.02   | 0.0143   | 0.027704 | MMR        |
| 231 | Alfredsson R              | 2004 | Europe        | 300    | 33    | 0.11   | 0.0769   | 0.151    | MMR        |
| 232 | Restivo V                 | 2015 | Europe        | 443    | 66    | 0.15   | 0.1189   | 0.184    | MMR        |
| 233 | Byström E                 | 2014 | Europe        | 20     | 11    | 0.55   | 0.3153   | 0.7694   | MMR        |
| 234 | Roberts RJ                | 1995 | Europe        | 307    | 233   | 0.76   | 0.707114 | 0.805727 | MMR        |
| 235 | Giambi C                  | 2017 | Europe        | 3130   | 22    | 0.007  | 0.00441  | 0.010622 | Not stated |
| 236 | Bianco A                  | 2019 | Europe        | 575    | 44    | 0.07   | 0.0561   | 0.1014   | Not stated |
| 237 | Bocquier A                | 2018 | Europe        | 15216  | 3956  | 0.26   | 0.253034 | 0.267037 | Not stated |
| 238 | Bertoncello C             | 2020 | Europe        | 3685   | 1327  | 0.36   | 0.3446   | 0.3759   | Not stated |
| 239 | Bankiewicz P              | 2022 | Europe        | 53     | 20    | 0.37   | 0.247872 | 0.521061 | Others     |
| 240 | Allaert F-A               | 2009 | Europe        | 2593   | 570   | 0.22   | 0.204014 | 0.236267 | Others     |
| 241 | Gács Z                    | 2022 | Europe        | 430    | 108   | 0.251  | 0.210843 | 0.294945 | Others     |
| 242 | Huber A                   | 2020 | Europe        | 1042   | 479   | 0.46   | 0.429104 | 0.490511 | Others     |
| 243 | Gjini, E.                 | 2023 | Europe        | 475    | 23    | 0.04   | 0.030    | 0.071    | Mix        |
| 244 | Seiler, M.                | 2021 | Europe        | 622    | 549   | 0.88   | 0.854    | 0.906    | Covid-19   |
| 245 | Smith, L.E.               | 2022 | Europe        | 270    | 60    | 0.22   | 0.174    | 0.276    | Covid-19   |
| 246 | Ates, BO                  | 2023 | Europe        | 284    | 9     | 0.03   | 0.014    | 0.059    | Covid-19   |
| 247 | Avcı, D                   | 2023 | Europe        | 381    | 114   | 0.29   | 0.253    | 0.347    | Others     |
| 248 | Sherman, S.M.             | 2023 | Europe        | 596    | 42    | 0.07   | 0.051    | 0.094    | Others     |
| 249 | Yılmaz, M.                | 2021 | Europe        | 1035   | 659   | 0.637  | 0.606    | 0.666    | Covid-19   |
| 250 | Savarese G.               | 2022 | Europe        | 1105   | 987   | 0.894  | 0.873    | 0.910    | Covid-19   |
| 251 | Bag, O and Guney, SA      | 2023 | Europe        | 110    | 44    | 0.4    | 0.307    | 0.497    | Not stated |
| 252 | Bektas, I and Bektas, M   | 2023 | Europe        | 199    | 40    | 0.20   | 0.147    | 0.263    | Covid-19   |
| 253 | Celik, T and Dogan, D     | 2023 | Europe        | 102    | 47    | 0.46   | 0.361    | 0.562    | Covid-19   |
| 254 | Duran, S et al            | 2023 | Europe        | 610    | 107   | 0.175  | 0.146    | 0.207    | Mix        |
| 255 | Sasic M. et al.,          | 2023 | Europe        | 872    | 306   | 0.351  | 0.319    | 0.383    | Covid-19   |
| 256 | Sahin, A. et al.,         | 2023 | Europe        | 396    | 165   | 0.417  | 0.367    | 0.466    | Covid-19   |
| 257 | Esposito, S. et al        | 2023 | Europe        | 3433   | 751   | 0.21   | 0.305    | 0.232    | Covid-19   |
| 258 | Grechukha, YO             | 2023 | Europe        | 797    | 113   | 0.142  | 0.118    | 0.167    | Not stated |
| 259 | Gundogdu, Z and Sezer, OY | 2023 | Europe        | 564    | 344   | 0.60   | 0.568    | 0.650    | Others     |
| 260 | Zona, S. et al.,          | 2021 | Europe        | 1799   | 796   | 0.44   | 0.419    | 0.465    | Covid-19   |
| 261 | Russo, L. et al.,         | 2021 | Europe        | 1205   | 403   | 0.33   | 0.307    | 0.361    | Covid-19   |
| 262 | Marron, L. et al          | 2023 | Europe        | 855    | 61    | 0.07   | 0.055    | 0.907    | Mix        |
| 263 | Halima Y.A. et al.,       | 2023 | Europe        | 183    | 119   | 0.65   | 0.576    | 0.719    | Influenza  |
| 264 | Goldman RD                | 2020 | Mix           | 1005   | 332   | 0.33   | 0.301305 | 0.360389 | Covid-19   |
| 265 | Goldman, RD               | 2022 | Mix           | 882    | 171   | 0.194  | 0.168278 | 0.22154  | Covid-19   |
| 266 | Goldman, RD               | 2022 | Mix           | 1956   | 1226  | 0.627  | 0.604923 | 0.648275 | Covid-19   |
| 267 | Urrunaga-Pastor D         | 2021 | Mix           | 227740 | 17763 | 0.078  | 0.076899 | 0.079106 | Covid-19   |
| 268 | Sabra HK                  | 2022 | Mix           | 1302   | 511   | 0.393  | 0.365834 | 0.419599 | Covid-19   |
| 269 | Yılmaz M                  | 2023 | Mix           | 94     | 14    | 0.149  | 0.083    | 0.237    | Mix        |
| 270 | Tekin C.                  | 2023 | Mix           | 1100   | 123   | 0.112  | 0.093    | 0.131    | Mix        |
| 271 | Hill, AV                  | 2022 | North America | 299    | 81    | 0.27   | 0.221349 | 0.325061 | Covid-19   |
| 272 | Skeens, M.                | 2022 | North America | 113    | 18    | 0.16   | 0.097226 | 0.240018 | Covid-19   |
| 273 | Guerin RJ                 | 2022 | North America | 7298   | 1387  | 0.19   | 0.181107 | 0.199245 | Covid-19   |
| 274 | Suvada KA                 | 2022 | North America | 6068   | 508   | 0.084  | 0.076868 | 0.090971 | Covid-19   |
| 275 | Hetherington E            | 2021 | North America | 1321   | 113   | 0.086  | 0.071016 | 0.101941 | Covid-19   |
| 276 | Hopfer S                  | 2022 | North America | 46     | 5     | 0.11   | 0.036248 | 0.235697 | Covid-19   |
| 277 | McKinnon B                | 2021 | North America | 809    | 100   | 0.124  | 0.101716 | 0.148287 | Covid-19   |
| 278 | Limbers CA                | 2022 | North America | 821    | 35    | 0.043  | 0.029871 | 0.058793 | Covid-19   |
| 279 | Willis DE                 | 2022 | North America | 665    | 73    | 0.11   | 0.087038 | 0.13604  | Covid-19   |

|     |                     |      |               |       |       |       |          |          |            |
|-----|---------------------|------|---------------|-------|-------|-------|----------|----------|------------|
| 280 | Bonuck K            | 2022 | North America | 352   | 53    | 0.15  | 0.114865 | 0.192276 | Covid-19   |
| 281 | Teasdale CA         | 2021 | North America | 1119  | 18    | 0.016 | 0.009561 | 0.025304 | Covid-19   |
| 282 | Schiff J            | 2022 | North America | 58    | 9     | 0.155 | 0.073493 | 0.274232 | Covid-19   |
| 283 | McElfish PA         | 2022 | North America | 369   | 63    | 0.17  | 0.13376  | 0.213084 | Covid-19   |
| 284 | Lessard L           | 2022 | North America | 168   | 30    | 0.179 | 0.123844 | 0.245002 | Covid-19   |
| 285 | Skeens MA           | 2022 | North America | 491   | 90    | 0.183 | 0.150052 | 0.220414 | Covid-19   |
| 286 | Wang CH             | 2022 | North America | 121   | 21    | 0.174 | 0.110761 | 0.252977 | Covid-19   |
| 287 | Drouin O            | 2022 | North America | 305   | 58    | 0.191 | 0.147683 | 0.23878  | Covid-19   |
| 288 | Panchalingam T      | 2022 | North America | 1456  | 296   | 0.203 | 0.182896 | 0.224901 | Covid-19   |
| 289 | Humble RM           | 2022 | North America | 1129  | 230   | 0.204 | 0.18058  | 0.228415 | Covid-19   |
| 290 | Byrne A             | 2022 | North America | 2620  | 576   | 0.22  | 0.204119 | 0.236205 | Covid-19   |
| 291 | Teasdale CA         | 2021 | North America | 2074  | 531   | 0.256 | 0.237358 | 0.275388 | Covid-19   |
| 292 | Cioffredi LA        | 2022 | North America | 78    | 16    | 0.2   | 0.122037 | 0.31163  | Covid-19   |
| 293 | Reindl D            | 2022 | North America | 582   | 157   | 0.27  | 0.234088 | 0.307787 | Covid-19   |
| 294 | Scherer AM          | 2022 | North America | 2031  | 571   | 0.281 | 0.261672 | 0.301246 | Covid-19   |
| 295 | Teasdale CA         | 2022 | North America | 1119  | 166   | 0.148 | 0.12802  | 0.170542 | Covid-19   |
| 296 | de St Maurice A     | 2022 | North America | 12288 | 3686  | 0.3   | 0.291873 | 0.308157 | Covid-19   |
| 297 | Dayton L            | 2022 | North America | 297   | 93    | 0.31  | 0.260804 | 0.369234 | Covid-19   |
| 298 | Szilagy PG          | 2021 | North America | 1745  | 574   | 0.329 | 0.306912 | 0.351544 | Covid-19   |
| 299 | O'Dor SL            | 2022 | North America | 254   | 51    | 0.2   | 0.153307 | 0.255399 | Covid-19   |
| 300 | Goldman, RD         | 2022 | North America | 2687  | 906   | 0.34  | 0.319304 | 0.35541  | Covid-19   |
| 301 | Baumer-Mouradian SH | 2022 | North America | 589   | 295   | 0.5   | 0.459703 | 0.541986 | Covid-19   |
| 302 | Santibanez TA       | 2022 | North America | 4496  | 935   | 0.208 | 0.196181 | 0.220125 | Covid-19   |
| 303 | Marquez RR          | 2021 | North America | 97    | 38    | 0.392 | 0.294176 | 0.496125 | Covid-19   |
| 304 | Mangat C            | 2022 | North America | 1301  | 516   | 0.397 | 0.369911 | 0.423794 | Covid-19   |
| 305 | Delgado JR          | 2022 | North America | 1051  | 438   | 0.417 | 0.386733 | 0.447227 | Covid-19   |
| 306 | Head KJ             | 2022 | North America | 10266 | 4332  | 0.422 | 0.412397 | 0.431599 | Covid-19   |
| 307 | Fisher CB           | 2022 | North America | 411   | 190   | 0.462 | 0.413293 | 0.511829 | Covid-19   |
| 308 | Lam CN              | 2022 | North America | 401   | 206   | 0.514 | 0.463604 | 0.563624 | Covid-19   |
| 309 | Schilling S         | 2022 | North America | 50    | 31    | 0.62  | 0.471749 | 0.753499 | Covid-19   |
| 310 | Temple AM           | 2022 | North America | 204   | 140   | 0.68  | 0.617774 | 0.749265 | Covid-19   |
| 311 | Nguyen KH           | 2022 | North America | 11478 | 1435  | 0.125 | 0.119023 | 0.131211 | Covid-19   |
| 312 | Humble RM           | 2021 | North America | 1702  | 628   | 0.369 | 0.346002 | 0.392406 | Covid-19   |
| 313 | Hammershaimb EA     | 2022 | North America | 3230  | 1304  | 0.404 | 0.386734 | 0.420871 | Covid-19   |
| 314 | Salazar TL          | 2022 | North America | 93    | 14    | 0.15  | 0.084816 | 0.239661 | Covid-19   |
| 315 | Srivastava T        | 2022 | North America | 334   | 23    | 0.069 | 0.04415  | 0.101538 | Covid-19   |
| 316 | Brabin L            | 2008 | North America | 2817  | 228   | 0.08  | 0.071127 | 0.091628 | HPV        |
| 317 | Myhre A             | 2020 | North America | 355   | 45    | 0.13  | 0.093983 | 0.165918 | HPV        |
| 318 | Dorell C            | 2014 | North America | 4103  | 86    | 0.021 | 0.016799 | 0.025822 | HPV        |
| 319 | Beavis A            | 2018 | North America | 46853 | 10776 | 0.23  | 0.226192 | 0.233834 | HPV        |
| 320 | Lee YM              | 2018 | North America | 74    | 19    | 0.26  | 0.162204 | 0.371565 | HPV        |
| 321 | Gilkey MB           | 2017 | North America | 1484  | 416   | 0.28  | 0.257588 | 0.303932 | HPV        |
| 322 | Thompson EL         | 2017 | North America | 59897 | 18867 | 0.315 | 0.311271 | 0.318728 | HPV        |
| 323 | Dundar Y            | 2022 | North America | 150   | 49    | 0.327 | 0.252404 | 0.407933 | HPV        |
| 324 | Ogilvie G           | 2010 | North America | 2025  | 717   | 0.354 | 0.333222 | 0.37535  | HPV        |
| 325 | Khodadadi AB        | 2020 | North America | 317   | 111   | 0.35  | 0.297688 | 0.405458 | HPV        |
| 326 | Staras SAS          | 2022 | North America | 25    | 9     | 0.36  | 0.179717 | 0.574794 | HPV        |
| 327 | Dempsey AF          | 2009 | North America | 52    | 19    | 0.36  | 0.236244 | 0.510441 | HPV        |
| 328 | Thompson EL         | 2022 | North America | 1192  | 463   | 0.388 | 0.360639 | 0.416759 | HPV        |
| 329 | Krok-Schoen JL      | 2018 | North America | 337   | 131   | 0.39  | 0.336377 | 0.443045 | HPV        |
| 330 | Hirth JM            | 2019 | North America | 90866 | 57427 | 0.63  | 0.628851 | 0.635134 | HPV        |
| 331 | Ayash C             | 2022 | North America | 162   | 26    | 0.16  | 0.107599 | 0.226251 | HPV        |
| 332 | Kempe A             | 2020 | North America | 2176  | 137   | 0.063 | 0.053119 | 0.073997 | Influenza  |
| 333 | Nekrasov E          | 2020 | North America | 257   | 30    | 0.11  | 0.08016  | 0.162433 | Influenza  |
| 334 | Hofstetter AM       | 2018 | North America | 199   | 46    | 0.24  | 0.174482 | 0.296023 | Influenza  |
| 335 | Goss MD             | 2019 | North America | 244   | 76    | 0.31  | 0.253931 | 0.37367  | Influenza  |
| 336 | Cameron MA          | 2016 | North America | 786   | 385   | 0.49  | 0.454333 | 0.525388 | Influenza  |
| 337 | Nguyen AT           | 2022 | North America | 59424 | 40580 | 0.68  | 0.67913  | 0.68663  | Influenza  |
| 338 | He K                | 2022 | North America | 175   | 23    | 0.13  | 0.085173 | 0.190655 | Mix        |
| 339 | Footman A           | 2022 | North America | 21    | 2     | 0.095 | 0.011749 | 0.303774 | Mix        |
| 340 | Bardenheier B       | 2004 | North America | 2315  | 232   | 0.1   | 0.088279 | 0.113175 | Mix        |
| 341 | Freed GL            | 2009 | North America | 1552  | 171   | 0.11  | 0.095029 | 0.126824 | Mix        |
| 342 | Gilkey MB           | 2013 | North America | 1847  | 222   | 0.12  | 0.105706 | 0.135902 | Mix        |
| 343 | Gilkey GB           | 2016 | North America | 9354  | 1431  | 0.153 | 0.145743 | 0.160439 | Mix        |
| 344 | Gilkey MB           | 2016 | North America | 9018  | 2191  | 0.243 | 0.234136 | 0.251948 | Mix        |
| 345 | Letterie MC         | 2022 | North America | 1066  | 298   | 0.28  | 0.25278  | 0.307543 | Mix        |
| 346 | Wolff ER            | 2014 | North America | 99    | 28    | 0.28  | 0.196862 | 0.382216 | Mix        |
| 347 | Navin MC            | 2019 | North America | 4098  | 1598  | 0.39  | 0.374974 | 0.405076 | Mix        |
| 348 | Howell JL           | 2022 | North America | 863   | 74    | 0.09  | 0.067928 | 0.106453 | Mix        |
| 349 | Gowda C             | 2013 | North America | 79    | 16    | 0.2   | 0.120427 | 0.307957 | MMR        |
| 350 | Kettunen C.         | 2017 | North America | 84    | 2     | 0.024 | 0.002897 | 0.083375 | Not stated |

|     |                                     |      |               |       |      |       |          |          |            |
|-----|-------------------------------------|------|---------------|-------|------|-------|----------|----------|------------|
| 351 | Cheng ER                            | 2019 | North America | 1047  | 31   | 0.03  | 0.020204 | 0.041765 | Not stated |
| 352 | Boyle J                             | 2020 | North America | 1029  | 36   | 0.03  | 0.024621 | 0.048108 | Not stated |
| 353 | Dudley MZ                           | 2020 | North America | 2196  | 154  | 0.07  | 0.059799 | 0.08162  | Not stated |
| 354 | Kwan BM                             | 2022 | North America | 824   | 118  | 0.143 | 0.119991 | 0.169002 | Not stated |
| 355 | Gust DA                             | 2008 | North America | 3924  | 1099 | 0.28  | 0.266062 | 0.294409 | Not stated |
| 356 | Blaisdell LL                        | 2015 | North America | 42    | 14   | 0.33  | 0.195668 | 0.495488 | Not stated |
| 357 | Glanz JM                            | 2013 | North America | 443   | 164  | 0.37  | 0.325869 | 0.417951 | Not stated |
| 358 | Mergler MJ                          | 2013 | North America | 1367  | 533  | 0.39  | 0.363945 | 0.41634  | Not stated |
| 359 | Chung Y                             | 2017 | North America | 2603  | 1510 | 0.58  | 0.560867 | 0.599153 | Not stated |
| 360 | Brown B                             | 2017 | North America | 200   | 36   | 0.18  | 0.129369 | 0.240381 | Others     |
| 361 | Sahni LC                            | 2020 | North America | 338   | 64   | 0.19  | 0.148985 | 0.235255 | Others     |
| 362 | Goin-Kochel RP                      | 2020 | North America | 225   | 63   | 0.28  | 0.222362 | 0.343537 | Others     |
| 363 | Bardenheier B                       | 2003 | North America | 648   | 246  | 0.38  | 0.342115 | 0.418246 | Others     |
| 364 | Beatty and Villwock                 | 2021 | North America | 179   | 87   | 0.49  | 0.410    | 0.561    | Influenza  |
| 365 | Sokol, RL and Grummom, AH           | 2020 | North America | 1893  | 757  | 0.40  | 0.377    | 0.422    | Covid-19   |
| 366 | Zhu X                               | 2023 | North America | 342   | 133  | 0.410 | 0.356    | 0.466    | HPV        |
| 367 | Yousaf A. R.                        | 2023 | North America | 94    | 35   | 0.37  | 0.274    | 0.478    | Covid-19   |
| 368 | Wigle J.                            | 2023 | North America | 20    | 3    | 0.15  | 0.032    | 0.378    | Covid-19   |
| 369 | Arrigoni, L and Strohm-Fraber, J    | 2023 | North America | 28    | 3    | 0.107 | 0.022    | 0.282    | Covid-19   |
| 370 | Shen A.K.                           | 2023 | North America | 971   | 352  | 0.36  | 0.332    | 0.393    | Covid-19   |
| 371 | Schellenberg, N.                    | 2021 | North America | 6125  | 941  | 0.15  | 0.144    | 0.162    | Mix        |
| 372 | Batra, K.                           | 2023 | North America | 263   | 110  | 0.41  | 0.357    | 0.480    | Covid-19   |
| 373 | Alfieri, N.L. et al.                | 2021 | North America | 1425  | 470  | 0.33  | 0.305    | 0.354    | Covid-19   |
| 374 | Lachance-Grzela, M. et al.,         | 2022 | North America | 406   | 34   | 0.08  | 0.058    | 0.115    | Covid-19   |
| 375 | Davidson, CA et al                  | 2023 | North America | 129   | 17   | 0.13  | 0.078    | 0.202    | Covid-19   |
| 376 | Gooding, GD et al                   | 2023 | North America | 146   | 51   | 0.35  | 0.272    | 0.432    | Covid-19   |
| 377 | Mondal P & Sinharoy A               | 2023 | North America | 2622  | 894  | 0.34  | 0.322    | 0.359    | Covid-19   |
| 378 | Wojcicki, JM et al                  | 2022 | North America | 391   | 104  | 0.26  | 0.222    | 0.312    | Covid-19   |
| 379 | Middleman A.B. et al.,              | 2021 | North America | 500   | 120  | 0.24  | 0.203    | 0.279    | Covid-19   |
| 380 | Margolis M. A. et al.,              | 2022 | North America | 1263  | 447  | 0.35  | 0.327    | 0.381    | HPV        |
| 381 | Kohler, RE et al                    | 2023 | North America | 22    | 10   | 0.45  | 0.243    | 0.677    | Covid-19   |
| 382 | Kheil, M.H. et al.,                 | 2022 | North America | 1746  | 105  | 0.06  | 0.049    | 0.072    | Covid-19   |
| 383 | Choi, K. et al.,                    | 2021 | North America | 322   | 209  | 0.65  | 0.594    | 0.701    | Covid-19   |
| 384 | Mensah-Bonsu, NE et al              | 2021 | North America | 89    | 21   | 0.24  | 0.152    | 0.337    | MMR        |
| 385 | Wharton-Michael P & Wharton-Clark A | 2019 | North America | 20    | 20   | 1.0   | 0.831    | 1        | MMR        |
| 386 | Parker A.A. et al.,                 | 2006 | North America | 66    | 35   | 0.53  | 0.403    | 0.654    | MMR        |
| 387 | Dempsey AF, et al.                  | 2011 | North America | 748   | 127  | 0.17  | 0.143    | 0.198    | MMR        |
| 388 | Downs, JS et al                     | 2008 | North America | 30    | 11   | 0.36  | 0.199    | 0.561    | MMR        |
| 389 | Cataldi, JR et al                   | 2016 | North America | 306   | 6    | 0.02  | 0.007    | 0.042    | MMR        |
| 390 | Lieu, TA et al                      | 2015 | North America | 50233 | 1752 | 0.034 | 0.033    | 0.036    | MMR        |
| 391 | Mills, K et al                      | 2020 | North America | 89    | 66   | 0.741 | 0.637    | 0.828    | MMR        |
| 392 | Gennaro, E et al                    | 2021 | North America | 135   | 3    | 0.02  | 0.004    | 0.063    | Mix        |
| 393 | Langkamp, DL et al                  | 2020 | North America | 63    | 11   | 0.18  | 0.090    | 0.290    | Mix        |
| 394 | Opel D.J. et al.,                   | 2013 | North America | 437   | 33   | 0.075 | 0.525    | 0.104    | Mix        |
| 395 | Opel D.J. et al.,                   | 2011 | North America | 237   | 37   | 0.16  | 0.112    | 0.208    | Mix        |
| 396 | Christianson, B et al               | 2020 | North America | 300   | 176  | 0.58  | 0.528    | 0.642    | MMR        |
| 397 | Frew, PM et al                      | 2016 | North America | 5121  | 207  | 0.04  | 0.035    | 0.046    | Mix        |
| 398 | Fuchs, EL                           | 2016 | North America | 4022  | 1404 | 0.34  | 0.334    | 0.364    | Influenza  |
| 399 | Kennedy A.M & Gust D.A              | 2008 | North America | 12    | 3    | 0.25  | 0.054    | 0.571    | MMR        |
| 400 | Holroyd T.A. et al.,                | 2021 | North America | 85    | 37   | 0.44  | 0.328    | 0.546    | MMR        |
| 401 | Glanz, JM et al                     | 2020 | North America | 824   | 118  | 0.14  | 0.119    | 0.169    | Mix        |
| 402 | Sugerman, DE et al                  | 2010 | North America | 839   | 63   | 0.07  | 0.058    | 0.095    | MMR        |
| 403 | Duchsherer A. et al.,               | 2020 | North America | 343   | 52   | 0.15  | 0.115    | 0.194    | HPV        |
| 404 | Davis, MM et al                     | 2020 | North America | 1008  | 403  | 0.40  | 0.369    | 0.430    | Covid-19   |
| 405 | Gilbert NL                          | 2016 | North America | 5720  | 800  | 0.14  | 0.1396   | 0.1484   | HPV        |
| 406 | Phan TL                             | 2022 | North America | 513   | 77   | 0.15  | 0.120306 | 0.183988 | Covid-19   |
| 407 | Ruiz JB                             | 2022 | North America | 637   | 52   | 0.082 | 0.061566 | 0.105674 | Covid-19   |
| 408 | Shen AK                             | 2022 | North America | 41    | 7    | 0.17  | 0.071515 | 0.320561 | Mix        |
| 409 | Wang CS                             | 2022 | North America | 207   | 52   | 0.25  | 0.193664 | 0.316025 | Mix        |
| 410 | Dubé E                              | 2019 | North America | 2645  | 653  | 0.25  | 0.230547 | 0.263777 | Not stated |
| 411 | Guay M                              | 2019 | North America | 8737  | 2796 | 0.32  | 0.310241 | 0.329916 | Not stated |
| 412 | Greyson D                           | 2017 | North America | 23    | 9    | 0.39  | 0.1971   | 0.6146   | Not stated |
| 413 | Dubé E                              | 2016 | North America | 510   | 51   | 0.1   | 0.0789   | 0.1245   | Others     |
| 414 | Perez S                             | 2015 | North America | 2874  | 172  | 0.06  | 0.051453 | 0.069151 | HPV        |
| 415 | Krawczyk A                          | 2015 | North America | 806   | 100  | 0.12  | 0.0986   | 0.1439   | HPV        |
| 416 | Evans S                             | 2021 | Oceania       | 1094  | 101  | 0.093 | 0.075826 | 0.111047 | Covid-19   |
| 417 | Jeffs E                             | 2021 | Oceania       | 1173  | 356  | 0.304 | 0.277278 | 0.330702 | Covid-19   |

|     |                           |      |               |       |      |        |          |          |            |
|-----|---------------------------|------|---------------|-------|------|--------|----------|----------|------------|
| 418 | Jones K                   | 1992 | Oceania       | 84    | 14   | 0.17   | 0.094224 | 0.2638   | Influenza  |
| 419 | Debela MS                 | 2022 | Oceania       | 178   | 29   | 0.163  | 0.111908 | 0.225528 | Mix        |
| 420 | Forbes TA                 | 2015 | Oceania       | 38    | 4    | 0.11   | 0.029435 | 0.248049 | Mix        |
| 421 | Corben P                  | 2018 | Oceania       | 231   | 5    | 0.022  | 0.007065 | 0.049787 | Not stated |
| 422 | Armiento R                | 2020 | Oceania       | 607   | 115  | 0.19   | 0.159032 | 0.222937 | Not stated |
| 423 | Rozbroj T                 | 2019 | Oceania       | 904   | 347  | 0.38   | 0.352017 | 0.416442 | Not stated |
| 424 | Attwell K                 | 2016 | Oceania       | 304   | 185  | 0.613  | 0.551202 | 0.663766 | Not stated |
| 425 | Bolsewicz, KT et al       | 2023 | Oceania       | 21    | 2    | 0.09   | 0.0117   | 0.3037   | Covid-19   |
| 426 | Kuan-Mahecha M.A. et al., | 2023 | South America | 503   | 9    | 0.02   | 0.008    | 0.033    | Mix        |
| 427 | Benites-Zapata VA         | 2022 | South America | 68980 | 4925 | 0.0713 | 0.069487 | 0.073344 | Covid-19   |
| 428 | Martinez EZ               | 2022 | South America | 1007  | 331  | 0.329  | 0.299726 | 0.358678 | Covid-19   |
| 429 | Gentile A                 | 2021 | South America | 600   | 69   | 0.115  | 0.090587 | 0.143276 | Mix        |
| 430 | Burghouts J               | 2017 | South America | 67    | 25   | 0.37   | 0.257974 | 0.499895 | Mix        |
| 431 | Brunelli L                | 2020 | South America | 2557  | 38   | 0.015  | 0.010538 | 0.020342 | Not stated |
| 432 | Brown AL                  | 2018 | South America | 952   | 256  | 0.269  | 0.240968 | 0.298285 | Not stated |
| 433 | Bono, SA                  | 2022 | South America | 6571  | 464  | 0.07   | 0.064    | 0.077    | Covid-19   |
| 434 | Neto J.O.                 | 2023 | South America | 1261  | 63   | 0.05   | 0.038    | 0.063    | Mix        |
