# Supplementary material for: Prevalence of caregiver hesitancy for vaccinations in children and its associated factors: A systematic review and meta-analysis
Source: PubMed Central journal article supplement (PMC11500859; doi:10.1371/journal.pone.0302379), 2024-10-24
Supplement: pone.0302379.s010.pdf [file pone.0302379.s010.pdf]

**S6 Table: Overall prevalence of the vaccine hesitancy across the regions**

| Vaccine                     | Overall prevalence | CI value    | I <sup>2</sup> | p-value | Egger test |
|-----------------------------|--------------------|-------------|----------------|---------|------------|
| <b>All vaccine (N= 434)</b> |                    |             |                |         |            |
| All regions                 | 0.25               | 0.22, 0.27  | 99.91          | 0.001   | 0.0001     |
| Asia                        | 0.31               | 0.27, 0.34  | 99.95          | 0.001   | 0.0243     |
| North America               | 0.25               | 0.23, 0.28  | 99.87          | 0.001   | 0.0014     |
| South America               | 0.18               | 0.08, 0.27  | 99.85          | 0.001   | 0.0146     |
| Africa                      | 0.26               | 0.16, 0.36  | 99.78          | 0.001   | 0.0988     |
| Europe                      | 0.27               | 0.22, 0.32  | 99.94          | 0.001   | 0.1759     |
| Oceania                     | 0.22               | 0.11, 0.33  | 99.00          | 0.001   | 0.6386     |
| Mix                         | 0.25               | 0.13, 0.37  | 99.85          | 0.001   | 0.9028     |
| <b>Covid – 19 (N = 189)</b> |                    |             |                |         |            |
| All regions                 | 0.29               | 0.26, 0.32  | 99.91          | 0.001   | 0.1609     |
| Africa                      | 0.41               | 0.13, 0.69  | 99.03          | 0.001   | NA         |
| Asia                        | 0.29               | 0.25, 0.34  | 99.91          | 0.001   | 0.3878     |
| North America               | 0.26               | 0.22, 0.30  | 99.56          | 0.001   | 0.1003     |
| South America               | 0.16               | 0.01, 0.32  | 99.95          | 0.001   | 0.0001     |
| Europe                      | 0.35               | 0.27, 0.43  | 99.71          | 0.001   | 0.4733     |
| Oceania                     | 0.17               | 0.02, 0.31  | 98.31          | 0.001   | 0.6410     |
| Mix                         | 0.33               | 0.18, 0.48  | 99.79          | 0.001   | 0.2575     |
| <b>HPV (N = 53)</b>         |                    |             |                |         |            |
| All regions                 | 0.31               | 0.24, 0.37  | 99.93          | 0.001   | 0.7449     |
| Africa                      | 0.25               | -0.11, 0.60 | 99.75          | 0.001   | 0.0124     |
| Europe                      | 0.16               | 0.07, 0.25  | 97.94          | 0.001   | 0.7986     |
| North America               | 0.26               | 0.20, 0.33  | 99.92          | 0.001   | 0.2725     |
| Asia                        | 0.43               | 0.30, 0.56  | 99.82          | 0.001   | 0.5152     |
| <b>Influenza (N = 28)</b>   |                    |             |                |         |            |
| All                         | 0.36               | 0.26, 0.46  | 99.92          | 0.001   | 0.4424     |
| Asia                        | 0.34               | 0.19, 0.48  | 99.92          | 0.001   | 0.0856     |
| Europe                      | 0.48               | 0.19, 0.78  | 99.54          | 0.001   | 0.6573     |
| North America               | 0.34               | 0.20, 0.48  | 99.85          | 0.001   | 0.8714     |
| <b>Mix (N = 76)</b>         |                    |             |                |         |            |
| All                         | 0.20               | 0.16, 0.24  | 99.93          | 0.001   | 0.0014     |
| Africa                      | 0.15               | 0.04, 0.26  | 98.36          | 0.001   | 0.0001     |
| Asia                        | 0.31               | 0.20, 0.41  | 99.97          | 0.001   | 0.0029     |
| Europe                      | 0.15               | 0.07, 0.22  | 99.81          | 0.001   | 0.6776     |
| Mix                         | 0.09               | 0.03, 0.16  | 95.95          | 0.001   | 0.2189     |
| Oceania                     | 0.15               | 0.10, 0.20  | 0.00           | 0.40    | NA         |
| South America               | 0.17               | -0.01, 0.35 | 99.16          | 0.001   | 0.0001     |
| North America               | 0.15               | 0.11, 0.19  | 99.37          | 0.001   | 0.5112     |
| <b>MMR (N = 23)</b>         |                    |             |                |         |            |
| All                         | 0.29               | 0.18, 0.40  | 99.99          | 0.001   | 0.0164     |
| Africa                      | 0.15               | 0.12, 0.17  | 69.65          | 0.05    | 0.0212     |
| Europe                      | 0.26               | 0.01, 0.51  | 99.97          | 0.001   | 0.1613     |
| North America               | 0.35               | 0.19, 0.50  | 99.76          | 0.001   | 0.2790     |
| <b>Not stated (N = 39)</b>  |                    |             |                |         |            |
| All                         | 0.23               | 0.17, 0.28  | 99.84          | 0.001   | 0.0044     |

|                        |      |            |       |       |        |
|------------------------|------|------------|-------|-------|--------|
| Asia                   | 0.18 | 0.10, 0.27 | 99.47 | 0.001 | 0.0001 |
| Europe                 | 0.18 | 0.06, 0.30 | 99.94 | 0.001 | 0.0843 |
| Oceania                | 0.30 | 0.05, 0.55 | 99.58 | 0.001 | 0.0002 |
| North America          | 0.24 | 0.15, 0.34 | 99.76 | 0.001 | 0.3188 |
| <b>Others (N = 26)</b> |      |            |       |       |        |
| All                    | 0.29 | 0.21, 0.36 | 99.60 | 0.001 | 0.2346 |
| Africa                 | 0.33 | 0.08, 0.58 | 99.87 | 0.001 | 0.0045 |
| Asia                   | 0.28 | 0.14, 0.41 | 99.65 | 0.001 | 0.7187 |
| Europe                 | 0.32 | 0.19, 0.45 | 99.18 | 0.001 | 0.5708 |
| North America          | 0.23 | 0.13, 0.32 | 96.47 | 0.001 | 0.5312 |

\*Overall prevalence was performed using random effect model; reported in percentage value; CI value in decimal value; I<sup>2</sup> heterogeneity value. NA: region have 2 or 3 publications.
